# Supplementary material for: Heritability of Gene Expression Measured from Peripheral Blood in Older Adults
Source: Genes (Basel). 2024 Apr 16;15(4):495. doi: 10.3390/genes15040495 (PMC11049887; doi:10.3390/genes15040495)
Supplement: Supplementary file 1 [file genes-15-00495-s001.zip › SI_2_Heritability_Blood Gene Expression_Older Adults_Revised_Version.xlsx]

## Sheet: Index
Supplementary tables:
Table S1: List of FDR significant heritable probes (n=5269) in OATS
Table S2: Chromosome-wise analysis of OATS FDR significant genes (n=4605)
Table S3 - Gene length & percentage GC content for the available FDR significant genes in OATS (n=4430)
Table S4a: List of Ageing associated (n=265) available for OATS analysis
Table S4b: List of Longevity related genes (n=225) available for OATS analysis
Table S4c: Ageing associated and Longevity overlapping list of genes
Table S4d: Chi-square table for Longevity related genes for OATS and Ouwens et al., 2020
Table S4e: Chi-square table for Ageing associated genes for OATS and Ouwens et al., 2020
Table S5: List of bottom most 460 (bottom 10%) genes with FDR>0.05 and that did not have any heritable transcripts
Table S6a: Mean, Standard deviation, Maximum and Minimum Heritability values for the 9479 overlapping genes across the three studies
Table S6b: The Pearson Correlations for the heritability of 9479 overlpping genes across the three studies
Table S7: List of FDR significant genes common across OATS, Wright et al., (2014) & Ouwens et al., (2020)
Table S8: FUMA gene set analysis results for 38 overlapping genes
Table S9: Gene heritability results for the full set of genes examined for OATS cohort

## Sheet: ST-1
Supplementary Table 1: List of FDR significant heritable probes (n=5269) in OATS
probes = 5269
unique genes= 4605
Probe ID	Gene symbol	Chr	Probe_position	h2	CI	CI_bootstrap	FDR
ILMN_1743145	ERAP2	5	9.62491e+07	0.87	0.81 - 0.91	0.84 - 0.90	2.91e-22
ILMN_1712918	NQO2	6	3.01717e+06	0.862	0.80 - 0.91	0.82 - 0.91	2.54e-21
ILMN_3236498	LOC253039	9	1.23616e+08	0.851	0.78 - 0.90	0.81 - 0.89	2.35e-19
ILMN_1805377	POMZP3	7	76239327	0.81	0.73 - 0.87	0.76 - 0.87	5.81e-18
ILMN_2201580	GSTM2	1	1.71964e+07	0.8	0.71 - 0.86	0.74 - 0.87	7.66e-18
ILMN_1830462	XYLT1	16	1.10218e+08	0.848	0.77 - 0.90	0.80 - 0.89	7.66e-18
ILMN_1713458	HBZ	16	204468	0.783	0.69 - 0.85	0.73 - 0.84	3.74e-17
ILMN_1730054	GSTT1	22	1.50502e+08	0.799	0.71 - 0.86	0.75 - 0.86	4.58e-17
ILMN_1791511	TMEM176A	7	2.43764e+07	0.81	0.72 - 0.87	0.76 - 0.86	4.58e-17
ILMN_1698243	C1orf85	1	1.56263e+08	0.799	0.71 - 0.86	0.75 - 0.84	5.45e-17
ILMN_1772627	D4S234E	4	4.42056e+06	0.806	0.71 - 0.87	0.74 - 0.86	1.58e-16
ILMN_2399463	VAV3	1	1.08114e+08	0.813	0.72 - 0.87	0.76 - 0.87	2.45e-16
ILMN_1716733	MYOM2	8	2.09321e+06	0.792	0.70 - 0.86	0.73 - 0.86	4.92e-16
ILMN_1753164	IPO8	12	1.2859e+08	0.789	0.69 - 0.85	0.73 - 0.85	1.3e-15
ILMN_2312606	IRF5	7	3.07823e+07	0.795	0.70 - 0.86	0.74 - 0.86	1.3e-15
ILMN_1683279	PEX6	6	4.29319e+07	0.828	0.74 - 0.88	0.78 - 0.88	1.96e-15
ILMN_2402805	TRPC4AP	20	6.52508e+07	0.781	0.68 - 0.85	0.70 - 0.85	2e-15
ILMN_1813139	ANKDD1A	15	3.35904e+07	0.799	0.70 - 0.86	0.73 - 0.87	2e-15
ILMN_1707137	C17orf97	17	264296	0.781	0.68 - 0.85	0.71 - 0.84	2.58e-15
ILMN_1783795	BTNL3	5	1.80433e+08	0.778	0.68 - 0.85	0.72 - 0.84	3.71e-15
ILMN_1671703	ACTA2	10	9.0695e+07	0.782	0.68 - 0.85	0.71 - 0.86	3.89e-15
ILMN_1670576	IRF5	7	5.48e+07	0.799	0.71 - 0.86	0.75 - 0.85	4.69e-15
ILMN_1661631	LILRA3	19	1.2859e+08	0.8	0.70 - 0.86	0.72 - 0.89	4.69e-15
ILMN_2313901	PAM	5	1.02365e+08	0.78	0.68 - 0.85	0.71 - 0.84	5.23e-15
ILMN_1734707	CHST13	3	1.26262e+08	0.822	0.73 - 0.88	0.75 - 0.89	6.28e-15
ILMN_1718936	LST1	6	838786	0.764	0.66 - 0.84	0.69 - 0.85	7.22e-15
ILMN_2326713	CD151	11	2.93518e+06	0.771	0.67 - 0.84	0.71 - 0.83	7.22e-15
ILMN_1688178	RRP7A	22	4.29086e+07	0.754	0.65 - 0.83	0.67 - 0.83	7.71e-15
ILMN_1709800	POMZP3	7	76254852	0.753	0.65 - 0.83	0.68 - 0.84	8.15e-15
ILMN_1738220	TLT3	6	4.11765e+07	0.762	0.66 - 0.83	0.69 - 0.84	1.21e-14
ILMN_1815895	HLA-DRB1	6	3.99944e+06	0.77	0.67 - 0.84	0.70 - 0.85	1.27e-14
ILMN_1777190	CFD	19	863296	0.796	0.70 - 0.86	0.74 - 0.87	1.36e-14
ILMN_2109416	NAPSB	19	5.08373e+07	0.777	0.67 - 0.85	0.71 - 0.84	1.74e-14
ILMN_1667330	LOC113386	19	5.88267e+07	0.762	0.66 - 0.84	0.68 - 0.84	3.4e-14
ILMN_1804735	CBS	21	4.44734e+07	0.779	0.67 - 0.85	0.71 - 0.83	3.63e-14
ILMN_3237878	LILRA3	19	5.48021e+07	0.806	0.71 - 0.87	0.74 - 0.88	3.87e-14
ILMN_1763455	VSTM1	19	54545039	0.76	0.65 - 0.83	0.69 - 0.84	5.37e-14
ILMN_1719064	KCTD10	12	1.09887e+08	0.737	0.63 - 0.81	0.68 - 0.81	6.18e-14
ILMN_1776519	RAP1GAP	1	2.19228e+07	0.737	0.63 - 0.82	0.67 - 0.80	6.7e-14
ILMN_1904238	ERICH1	8	564810	0.767	0.66 - 0.84	0.70 - 0.82	6.8e-14
ILMN_1798177	FNTB	14	6.54015e+07	0.773	0.67 - 0.84	0.70 - 0.87	7.42e-14
ILMN_1656938	SLC37A2	11	1.24959e+08	0.767	0.66 - 0.84	0.70 - 0.83	9.19e-14
ILMN_2050023	CCDC23	1	4.32731e+07	0.728	0.62 - 0.81	0.66 - 0.80	9.54e-14
ILMN_1667711	PLA2G16	11	6.33425e+07	0.742	0.63 - 0.82	0.67 - 0.81	1.09e-13
ILMN_2352023	DSTYK	1	2.05112e+08	0.782	0.68 - 0.85	0.71 - 0.85	1.26e-13
ILMN_2404850	RPL14	3	5.48021e+07	0.787	0.68 - 0.86	0.72 - 0.85	1.52e-13
ILMN_1786303	LILRA3	19	4.05038e+07	0.798	0.69 - 0.86	0.73 - 0.87	1.52e-13
ILMN_1730454	FOLR3	11	7.18509e+07	0.79	0.69 - 0.86	0.71 - 0.86	1.7e-13
ILMN_2377430	AGPAT2	9	1.39568e+08	0.734	0.62 - 0.81	0.66 - 0.81	1.84e-13
ILMN_1671423	AK125871	2	70017336	0.757	0.65 - 0.83	0.70 - 0.82	1.85e-13
ILMN_1674285	LOC401233	6	3.01953e+06	0.757	0.65 - 0.83	0.69 - 0.83	1.95e-13
ILMN_1796335	LPCAT2	16	1.00758e+08	0.73	0.62 - 0.81	0.66 - 0.81	5.01e-13
ILMN_1697544	SLC25A29	14	5.5617e+07	0.788	0.68 - 0.86	0.73 - 0.85	5.01e-13
ILMN_2326273	CHI3L2	1	952838	0.771	0.66 - 0.85	0.70 - 0.84	1.45e-12
ILMN_1793017	DGKQ	4	1.11785e+08	0.8	0.69 - 0.87	0.72 - 0.88	1.45e-12
ILMN_1652333	FN3KRP	17	8.06857e+07	0.697	0.58 - 0.78	0.61 - 0.78	4.74e-12
ILMN_1667162	NKX3-1	8	23536496	0.727	0.61 - 0.81	0.64 - 0.83	6.05e-12
ILMN_1660549	WLS	1	6.85643e+07	0.726	0.60 - 0.81	0.64 - 0.80	6.41e-12
ILMN_3309349	SNHG8	4	1.192e+08	0.719	0.60 - 0.80	0.63 - 0.82	7.65e-12
ILMN_1716218	RPS6KA2	6	1.67276e+08	0.738	0.62 - 0.82	0.65 - 0.83	8.4e-12
ILMN_2389590	PRKAR1A	17	6.65288e+07	0.708	0.58 - 0.80	0.62 - 0.80	8.7e-12
ILMN_1655990	CDK5RAP2	9	1.23151e+08	0.69	0.57 - 0.78	0.59 - 0.82	9.42e-12
ILMN_1687306	LGALS2	22	3.79666e+07	0.695	0.57 - 0.78	0.63 - 0.79	1.14e-11
ILMN_2116877	OLFM4	13	5.36261e+07	0.726	0.61 - 0.81	0.64 - 0.81	1.24e-11
ILMN_1663142	CLEC12A	12	1.0138e+07	0.745	0.62 - 0.83	0.68 - 0.82	1.27e-11
ILMN_1745103	CLEC1B	12	1.01478e+07	0.708	0.58 - 0.80	0.63 - 0.79	1.65e-11
ILMN_2223941	FBLN5	14	9.23361e+07	0.729	0.60 - 0.81	0.65 - 0.80	1.66e-11
ILMN_1696584	ORM1	9	117086367	0.7	0.58 - 0.79	0.63 - 0.78	2.15e-11
ILMN_1771482	KIAA1324	1	1.09746e+08	0.741	0.62 - 0.82	0.65 - 0.82	2.19e-11
ILMN_2144088	FDFT1	8	1.16964e+07	0.716	0.59 - 0.80	0.63 - 0.80	2.96e-11
ILMN_1688580	CAMP	3	4.82669e+07	0.691	0.56 - 0.78	0.59 - 0.81	3.63e-11
ILMN_2336133	SULT1A1	16	2.86175e+07	0.771	0.65 - 0.85	0.70 - 0.84	5.68e-11
ILMN_1749834	LOC388588	1	3.69244e+06	0.713	0.59 - 0.80	0.65 - 0.79	5.71e-11
ILMN_2196479	XRN2	20	2.13703e+07	0.708	0.58 - 0.80	0.64 - 0.78	5.95e-11
ILMN_1784040	NAPSA	19	50862272	0.686	0.56 - 0.78	0.61 - 0.76	6.44e-11
ILMN_1765332	TIMM10	11	5.7296e+07	0.683	0.55 - 0.78	0.58 - 0.79	7.19e-11
ILMN_2085012	TMEM176B	7	150489149	0.68	0.55 - 0.77	0.60 - 0.76	8e-11
ILMN_2200659	SNHG5	6	86388420	0.7	0.57 - 0.79	0.60 - 0.82	8.23e-11
ILMN_1697166	C9orf78	9	6.55141e+07	0.7	0.57 - 0.79	0.61 - 0.79	8.39e-11
ILMN_1839665	BQ186372	1	1.3259e+08	0.726	0.60 - 0.81	0.64 - 0.84	8.39e-11
ILMN_1810274	HOXB2	17	4.66204e+07	0.714	0.59 - 0.80	0.63 - 0.82	9.47e-11
ILMN_3272741	CD300H	17	7.25568e+07	0.753	0.62 - 0.84	0.67 - 0.83	1.01e-10
ILMN_1749070	HLA-DPB1	6	4.53528e+06	0.693	0.56 - 0.79	0.58 - 0.83	1.06e-10
ILMN_1742442	SIRPB1	20	1584460	0.666	0.54 - 0.76	0.58 - 0.75	1.08e-10
ILMN_3306672	PATL2	15	4.49593e+07	0.68	0.55 - 0.77	0.59 - 0.77	1.15e-10
ILMN_1739683	LRRC6	8	1.33585e+08	0.656	0.53 - 0.75	0.58 - 0.73	1.22e-10
ILMN_2113126	RNASE3	14	2.13602e+07	0.66	0.53 - 0.76	0.57 - 0.76	1.46e-10
ILMN_2283325	WLS	1	1.01379e+07	0.709	0.58 - 0.80	0.62 - 0.79	1.57e-10
ILMN_2403228	CLEC12A	12	6.85915e+07	0.732	0.60 - 0.82	0.66 - 0.82	1.57e-10
ILMN_1792356	DPYSL4	10	1.34019e+08	0.684	0.55 - 0.78	0.60 - 0.78	2.33e-10
ILMN_1781388	PGM5	9	7.11458e+07	0.672	0.54 - 0.77	0.59 - 0.75	2.4e-10
ILMN_1806056	CEACAM8	19	4.30846e+07	0.662	0.53 - 0.76	0.56 - 0.77	2.53e-10
ILMN_2399769	WLS	1	5.21155e+07	0.672	0.54 - 0.77	0.58 - 0.75	2.8e-10
ILMN_1740298	SIGLEC5	19	6.86103e+07	0.693	0.56 - 0.79	0.58 - 0.82	2.8e-10
ILMN_2089073	ATP9A	20	5.02134e+07	0.684	0.55 - 0.78	0.59 - 0.76	3.19e-10
ILMN_1669273	PPT1	1	4.05385e+07	0.701	0.57 - 0.79	0.61 - 0.79	3.34e-10
ILMN_1758529	P2RX1	17	3.80005e+06	0.685	0.55 - 0.78	0.60 - 0.76	3.35e-10
ILMN_3187680	ACCS	11	4.41055e+07	0.681	0.54 - 0.78	0.57 - 0.78	3.44e-10
ILMN_3194087	HSPC157	1	2.23572e+07	0.663	0.53 - 0.76	0.59 - 0.74	3.52e-10
ILMN_3240247	NOP10	15	3.4634e+07	0.661	0.53 - 0.76	0.57 - 0.79	3.96e-10
ILMN_1712026	NLRP3	1	2.47612e+08	0.679	0.55 - 0.78	0.59 - 0.77	3.98e-10
ILMN_1780533	RNASE6	14	2.12503e+07	0.696	0.56 - 0.79	0.61 - 0.78	4.04e-10
ILMN_1709590	PGM5	9	7.11458e+07	0.688	0.55 - 0.78	0.59 - 0.79	4.53e-10
ILMN_1747935	GOLGB1	3	1.21383e+08	0.705	0.57 - 0.80	0.61 - 0.79	5.02e-10
ILMN_1802557	HEBP1	12	1.3128e+07	0.696	0.56 - 0.79	0.60 - 0.78	5.65e-10
ILMN_2292178	CLEC12A	12	1.01316e+07	0.671	0.53 - 0.77	0.58 - 0.76	5.71e-10
ILMN_1680434	MAPK8IP1	11	4.59278e+07	0.703	0.57 - 0.80	0.61 - 0.81	5.87e-10
ILMN_1657446	NTPCR	1	1.83523e+08	0.652	0.52 - 0.75	0.57 - 0.75	5.88e-10
ILMN_2368597	SMG7	1	2.33114e+08	0.718	0.58 - 0.81	0.62 - 0.81	5.88e-10
ILMN_2391512	NAAA	4	9.98067e+07	0.647	0.51 - 0.75	0.54 - 0.75	6.31e-10
ILMN_1699631	GATS	7	7.68411e+07	0.656	0.52 - 0.76	0.56 - 0.75	6.31e-10
ILMN_3250243	METTL21A	2	2.08474e+08	0.671	0.53 - 0.77	0.59 - 0.75	6.35e-10
ILMN_2049642	RPA1	17	1.80116e+06	0.644	0.51 - 0.74	0.54 - 0.76	7.07e-10
ILMN_1762308	RUNDC2A	16	1.26679e+07	0.646	0.51 - 0.75	0.56 - 0.72	7.33e-10
ILMN_1898938	CN484989	2	1.92559e+08	0.638	0.50 - 0.74	0.56 - 0.74	7.51e-10
ILMN_1692223	LCN2	9	1.30915e+08	0.697	0.56 - 0.79	0.58 - 0.80	7.56e-10
ILMN_1695812	KRT72	12	5.29796e+07	0.665	0.53 - 0.77	0.56 - 0.77	7.63e-10
ILMN_1659411	POLR2C	16	5.75056e+07	0.679	0.54 - 0.78	0.57 - 0.79	7.98e-10
ILMN_1675483	ANKMY1	2	2.41419e+08	0.646	0.51 - 0.75	0.55 - 0.73	8.09e-10
ILMN_1690982	DDT	22	2.43138e+07	0.675	0.53 - 0.77	0.59 - 0.75	8.91e-10
ILMN_1697227	USP36	17	7.67837e+07	0.665	0.53 - 0.76	0.57 - 0.76	9.29e-10
ILMN_2061435	MEG3	14	1.01327e+08	0.702	0.56 - 0.80	0.61 - 0.78	1.02e-09
ILMN_1901198	HSPC157	1	1.23987e+08	0.652	0.51 - 0.75	0.55 - 0.75	1.16e-09
ILMN_2184966	ZHX2	8	22357409	0.748	0.61 - 0.84	0.65 - 0.84	1.16e-09
ILMN_2411127	YBEY	21	4.77113e+07	0.7	0.56 - 0.80	0.62 - 0.78	1.21e-09
ILMN_1703558	FHL3	1	3.84627e+07	0.658	0.52 - 0.76	0.56 - 0.76	1.5e-09
ILMN_1672120	KRT73	12	5.30014e+07	0.649	0.51 - 0.75	0.56 - 0.73	1.64e-09
ILMN_1743021	CAMKK2	12	1.21683e+08	0.685	0.54 - 0.78	0.59 - 0.79	2.03e-09
ILMN_1767377	SMA4	5	69423311	0.642	0.50 - 0.74	0.57 - 0.72	2.12e-09
ILMN_2069224	PVALB	22	3.72112e+07	0.683	0.54 - 0.78	0.58 - 0.80	2.2e-09
ILMN_1718063	LIPA	10	9.09737e+07	0.687	0.54 - 0.79	0.59 - 0.77	2.24e-09
ILMN_1723846	METTL21B	12	5.81762e+07	0.667	0.53 - 0.77	0.57 - 0.77	2.3e-09
ILMN_1766736	BPI	20	3.69657e+07	0.643	0.50 - 0.75	0.53 - 0.76	2.51e-09
ILMN_2302757	FCGBP	19	4.0354e+07	0.64	0.50 - 0.74	0.55 - 0.76	2.62e-09
ILMN_2090004	AQP10	1	4.66897e+07	0.643	0.50 - 0.75	0.53 - 0.75	2.64e-09
ILMN_2059886	TTC38	22	1.54298e+08	0.704	0.56 - 0.80	0.59 - 0.80	2.64e-09
ILMN_1795836	YBEY	21	4.77069e+07	0.633	0.49 - 0.74	0.53 - 0.74	2.75e-09
ILMN_2393693	LRRC37A4	17	4.35845e+07	0.646	0.51 - 0.75	0.54 - 0.76	3.08e-09
ILMN_3308808	MIR130A	11	1.44657e+08	0.652	0.51 - 0.75	0.56 - 0.75	3.15e-09
ILMN_1710752	NAPRT1	8	5.74087e+07	0.657	0.51 - 0.76	0.55 - 0.75	3.15e-09
ILMN_1753347	DEFA4	8	6794258	0.666	0.52 - 0.77	0.54 - 0.79	3.26e-09
ILMN_2358626	ADK	10	7.64682e+07	0.647	0.50 - 0.75	0.53 - 0.79	3.43e-09
ILMN_2349658	TSPO	22	4.35589e+07	0.636	0.49 - 0.74	0.53 - 0.75	3.81e-09
ILMN_1717793	C19orf33	19	2.13031e+08	0.651	0.50 - 0.76	0.55 - 0.76	4.23e-09
ILMN_3301042	LQK1	1	38795313	0.684	0.54 - 0.79	0.60 - 0.76	4.23e-09
ILMN_1706531	ABCC5	3	4.29121e+07	0.633	0.49 - 0.74	0.52 - 0.75	4.68e-09
ILMN_1656521	RRP7A	22	1.83638e+08	0.654	0.51 - 0.76	0.56 - 0.74	4.68e-09
ILMN_2342638	ASGR2	17	7.00544e+06	0.639	0.50 - 0.74	0.52 - 0.76	5.12e-09
ILMN_1745522	PF4V1	4	7.47191e+07	0.678	0.53 - 0.78	0.58 - 0.77	5.37e-09
ILMN_3298167	ZSWIM7	17	1.588e+07	0.671	0.52 - 0.77	0.57 - 0.76	5.65e-09
ILMN_1739001	TACSTD2	1	5.90413e+07	0.681	0.53 - 0.78	0.59 - 0.77	5.95e-09
ILMN_1665457	CLEC4C	12	7.89898e+06	0.605	0.46 - 0.71	0.51 - 0.72	5.99e-09
ILMN_1702229	CECR6	22	1.75974e+07	0.622	0.48 - 0.73	0.51 - 0.72	6.38e-09
ILMN_1730816	GPR162	12	6.93652e+06	0.659	0.51 - 0.76	0.55 - 0.76	6.96e-09
ILMN_1655595	SERPINE2	2	2.2484e+08	0.646	0.50 - 0.75	0.54 - 0.76	7.4e-09
ILMN_1676575	IKZF1	7	5.04702e+07	0.62	0.48 - 0.73	0.50 - 0.75	7.46e-09
ILMN_1767281	PPBP	4	7.48532e+07	0.612	0.47 - 0.72	0.52 - 0.70	8.03e-09
ILMN_1769575	JAM3	11	1.34022e+08	0.667	0.52 - 0.77	0.57 - 0.76	8.36e-09
ILMN_2358069	MAD1L1	7	1.93791e+06	0.643	0.50 - 0.75	0.52 - 0.78	8.42e-09
ILMN_1778360	PYGB	20	2.52783e+07	0.614	0.47 - 0.72	0.52 - 0.70	8.66e-09
ILMN_1733811	JUP	17	3.99112e+07	0.641	0.50 - 0.75	0.53 - 0.76	8.84e-09
ILMN_1671260	WLS	1	6.86117e+07	0.63	0.48 - 0.74	0.52 - 0.75	9.71e-09
ILMN_1666192	DCTN5	16	2.36809e+07	0.64	0.49 - 0.75	0.53 - 0.77	1.02e-08
ILMN_1768754	PILRB	7	9.99651e+07	0.642	0.50 - 0.75	0.55 - 0.75	1.07e-08
ILMN_1682259	CLEC4C	12	7883395	0.588	0.45 - 0.70	0.49 - 0.70	1.08e-08
ILMN_2120982	ALG11	13	5.26038e+07	0.635	0.49 - 0.74	0.54 - 0.73	1.09e-08
ILMN_1793476	PRKCDBP	11	3.4432e+07	0.659	0.51 - 0.77	0.56 - 0.74	1.1e-08
ILMN_1716276	CCL4	17	6.34039e+06	0.694	0.55 - 0.79	0.59 - 0.81	1.1e-08
ILMN_2038775	TUBB2A	6	3.1541e+06	0.688	0.54 - 0.79	0.60 - 0.78	1.18e-08
ILMN_1766157	MRVI1	11	219798	0.628	0.48 - 0.74	0.55 - 0.70	1.18e-08
ILMN_1747451	PLCXD1	X	1.05978e+07	0.639	0.49 - 0.75	0.52 - 0.76	1.18e-08
ILMN_2405190	VAPA	18	9.9595e+06	0.656	0.50 - 0.76	0.57 - 0.74	1.2e-08
ILMN_1775590	SCAND2	15	8.51845e+07	0.619	0.47 - 0.73	0.53 - 0.71	1.41e-08
ILMN_1741917	OSCAR	19	5.45983e+07	0.62	0.47 - 0.73	0.51 - 0.73	1.42e-08
ILMN_1768469	TCN1	11	59620689	0.663	0.51 - 0.77	0.52 - 0.79	1.43e-08
ILMN_1770030	C7orf43	7	9.97523e+07	0.626	0.48 - 0.74	0.53 - 0.71	1.55e-08
ILMN_1674985	TMEM51	1	1.55467e+07	0.658	0.51 - 0.76	0.54 - 0.76	1.55e-08
ILMN_1781819	PAPSS1	4	1.08535e+08	0.681	0.53 - 0.79	0.60 - 0.77	1.7e-08
ILMN_1682699	PBX2	6	3.21526e+07	0.607	0.46 - 0.72	0.49 - 0.73	1.71e-08
ILMN_1741371	TMEM8A	16	422176	0.63	0.48 - 0.74	0.52 - 0.74	1.77e-08
ILMN_1658247	OAS1	12	1.13356e+08	0.641	0.49 - 0.75	0.53 - 0.77	1.81e-08
ILMN_1765032	AK128346	3	1.95439e+08	0.64	0.49 - 0.75	0.53 - 0.77	2.07e-08
ILMN_1784641	NDUFA3	19	54606187	0.607	0.46 - 0.72	0.50 - 0.72	2.14e-08
ILMN_1796216	VASH1	14	7.72492e+07	0.657	0.51 - 0.76	0.55 - 0.76	2.16e-08
ILMN_1691693	FCRH3	1	1.57646e+08	0.659	0.51 - 0.77	0.55 - 0.78	2.22e-08
ILMN_1815205	LYZ	12	6.97461e+07	0.607	0.46 - 0.72	0.51 - 0.73	2.25e-08
ILMN_1701403	HIP1	7	7.51636e+07	0.653	0.50 - 0.76	0.55 - 0.76	2.25e-08
ILMN_1720059	HMBOX1	8	2.89091e+07	0.628	0.48 - 0.74	0.52 - 0.73	2.26e-08
ILMN_1712400	SERPINB6	6	2.94844e+06	0.679	0.52 - 0.78	0.58 - 0.77	2.35e-08
ILMN_3238785	SNHG9	16	2.12439e+07	0.572	0.43 - 0.69	0.47 - 0.69	2.39e-08
ILMN_1659857	SNAP29	22	2.01509e+06	0.635	0.48 - 0.74	0.52 - 0.75	2.39e-08
ILMN_1769782	LAX1	1	2.03745e+08	0.611	0.46 - 0.72	0.51 - 0.71	2.68e-08
ILMN_1708916	PDZD4	X	1.53068e+08	0.663	0.51 - 0.77	0.55 - 0.81	2.71e-08
ILMN_1757467	H1F0	22	3.82033e+07	0.653	0.50 - 0.76	0.55 - 0.76	3.17e-08
ILMN_1724437	GCAT	22	3.82127e+07	0.678	0.52 - 0.78	0.58 - 0.77	3.2e-08
ILMN_1714592	CDA	1	2.09452e+07	0.67	0.51 - 0.78	0.56 - 0.76	3.43e-08
ILMN_1790692	GNLY	2	8.59248e+07	0.625	0.47 - 0.74	0.51 - 0.75	3.79e-08
ILMN_2111739	MAN2C1	15	75648664	0.622	0.47 - 0.73	0.52 - 0.72	3.85e-08
ILMN_1763198	STAT6	12	5.74893e+07	0.641	0.49 - 0.75	0.54 - 0.74	3.87e-08
ILMN_3241657	TMEM204	16	1.60508e+06	0.647	0.49 - 0.76	0.54 - 0.75	3.93e-08
ILMN_2349124	OSBPL2	20	6.08708e+07	0.626	0.47 - 0.74	0.53 - 0.73	4.06e-08
ILMN_1770387	TMPRSS9	19	1.52183e+08	0.591	0.44 - 0.70	0.49 - 0.69	4.47e-08
ILMN_1682197	NFXL1	4	9.35515e+07	0.613	0.46 - 0.73	0.51 - 0.71	4.47e-08
ILMN_1782419	GNG11	7	4.78494e+07	0.614	0.46 - 0.73	0.51 - 0.71	4.47e-08
ILMN_2313158	MBNL1	3	2.42511e+06	0.628	0.47 - 0.74	0.52 - 0.74	4.47e-08
ILMN_1733932	SNUPN	15	7.58907e+07	0.606	0.46 - 0.72	0.52 - 0.71	4.59e-08
ILMN_1739297	POC1B	12	8.99155e+07	0.615	0.46 - 0.73	0.51 - 0.73	5.65e-08
ILMN_2376625	VHL	3	1.01937e+07	0.587	0.44 - 0.70	0.49 - 0.69	6.02e-08
ILMN_1735712	KRT1	12	2.94047e+06	0.59	0.44 - 0.71	0.50 - 0.68	6.08e-08
ILMN_1732830	RAP1GAP2	17	5.30689e+07	0.636	0.48 - 0.75	0.55 - 0.73	6.08e-08
ILMN_2355486	FAM3B	21	4.2719e+07	0.614	0.46 - 0.73	0.52 - 0.71	6.47e-08
ILMN_1719622	RABEP1	17	5.28866e+06	0.592	0.44 - 0.71	0.49 - 0.70	6.62e-08
ILMN_2229649	KCTD12	13	2.1968e+08	0.624	0.47 - 0.74	0.49 - 0.74	6.96e-08
ILMN_1704985	CYP27A1	2	7.74545e+07	0.67	0.51 - 0.78	0.56 - 0.77	6.96e-08
ILMN_3250614	EIF2AK1	7	6.06216e+06	0.651	0.49 - 0.76	0.55 - 0.75	7.08e-08
ILMN_2359945	CES1	16	5.5837e+07	0.606	0.45 - 0.72	0.48 - 0.78	7.4e-08
ILMN_1709820	AOAH	7	36552814	0.608	0.46 - 0.72	0.48 - 0.72	7.57e-08
ILMN_1664154	LINC00958	11	1.35267e+06	0.589	0.44 - 0.70	0.48 - 0.68	7.78e-08
ILMN_1702237	FKBP1A	20	1.29835e+07	0.59	0.44 - 0.70	0.49 - 0.71	7.78e-08
ILMN_2165993	ITLN1	1	160849124	0.598	0.44 - 0.71	0.49 - 0.71	8.25e-08
ILMN_1809147	FAM118A	22	4.57366e+07	0.65	0.49 - 0.76	0.54 - 0.75	8.34e-08
ILMN_1801216	S100P	4	6.69879e+06	0.591	0.44 - 0.71	0.46 - 0.74	8.96e-08
ILMN_2370872	GRINA	8	1.45067e+08	0.617	0.46 - 0.73	0.52 - 0.72	9.2e-08
ILMN_3188106	CYTH2	19	6.4948e+07	0.59	0.44 - 0.71	0.51 - 0.66	1e-07
ILMN_3230241	CR609936	11	4.89854e+07	0.629	0.47 - 0.75	0.51 - 0.71	1e-07
ILMN_1793724	C3orf31	3	11851009	0.658	0.49 - 0.77	0.54 - 0.75	1.09e-07
ILMN_2367418	OSCAR	19	5.45982e+07	0.607	0.45 - 0.72	0.50 - 0.71	1.1e-07
ILMN_1708779	GNLY	2	8.59215e+07	0.602	0.45 - 0.72	0.49 - 0.73	1.16e-07
ILMN_1680424	CTSG	14	2.50428e+07	0.585	0.43 - 0.70	0.46 - 0.71	1.16e-07
ILMN_2341626	MARCH8	10	4.59537e+07	0.635	0.47 - 0.75	0.52 - 0.74	1.18e-07
ILMN_1692464	TTC38	22	4.66897e+07	0.644	0.48 - 0.76	0.50 - 0.76	1.22e-07
ILMN_1758623	HIST1H2BD	6	2.61584e+07	0.658	0.49 - 0.77	0.54 - 0.75	1.22e-07
ILMN_1678238	ZNF683	1	2.66882e+07	0.592	0.44 - 0.71	0.49 - 0.70	1.26e-07
ILMN_1651496	HIST1H2BD	6	2.61713e+07	0.648	0.49 - 0.76	0.52 - 0.76	1.27e-07
ILMN_1752199	LHPP	10	1.26303e+08	0.601	0.44 - 0.72	0.50 - 0.70	1.38e-07
ILMN_2267787	HPS1	10	1.00189e+08	0.577	0.42 - 0.69	0.46 - 0.69	1.44e-07
ILMN_1762103	WDR48	3	3.91377e+07	0.595	0.44 - 0.71	0.50 - 0.68	1.45e-07
ILMN_2374692	WAC	10	28909316	0.603	0.45 - 0.72	0.49 - 0.70	1.46e-07
ILMN_1749875	BX647938	12	47716137	0.621	0.46 - 0.74	0.51 - 0.74	1.46e-07
ILMN_1656297	YBEY	21	9727512	0.628	0.47 - 0.74	0.52 - 0.74	1.46e-07
ILMN_1810191	PLA2G4C	19	4.85512e+07	0.58	0.43 - 0.70	0.45 - 0.69	1.55e-07
ILMN_2173294	THNSL2	2	8.84861e+07	0.606	0.45 - 0.72	0.51 - 0.71	1.74e-07
ILMN_2207328	C18orf10	18	3.43765e+07	0.589	0.43 - 0.71	0.45 - 0.70	1.85e-07
ILMN_1710124	CMTM8	3	32409474	0.613	0.45 - 0.73	0.51 - 0.72	1.91e-07
ILMN_1801254	NAIP	5	7.02661e+07	0.593	0.43 - 0.71	0.49 - 0.69	1.92e-07
ILMN_1788223	RSPH3	6	1.59399e+08	0.625	0.46 - 0.74	0.50 - 0.72	1.95e-07
ILMN_2086222	WDR11	10	1.22669e+08	0.612	0.45 - 0.73	0.50 - 0.71	2.1e-07
ILMN_1804822	SRXN1	20	627668	0.637	0.47 - 0.75	0.50 - 0.75	2.21e-07
ILMN_2353633	EMR2	19	5.07666e+07	0.628	0.47 - 0.74	0.51 - 0.75	2.31e-07
ILMN_1762594	NOD2	16	1.48438e+07	0.655	0.49 - 0.77	0.56 - 0.75	2.31e-07
ILMN_1695821	ACTR1B	2	9.82727e+07	0.563	0.41 - 0.68	0.46 - 0.66	2.36e-07
ILMN_1664464	PTGDS	9	1.39875e+08	0.653	0.49 - 0.77	0.55 - 0.75	2.46e-07
ILMN_1893633	LOC439949	10	6.62621e+06	0.636	0.47 - 0.75	0.51 - 0.76	2.46e-07
ILMN_1754114	FLJ20021	4	1.0227e+08	0.598	0.44 - 0.72	0.49 - 0.70	2.54e-07
ILMN_1751559	TMEM204	16	9.63948e+07	0.586	0.43 - 0.70	0.47 - 0.69	2.67e-07
ILMN_1690342	LTA4H	12	1.60526e+06	0.593	0.43 - 0.71	0.48 - 0.72	2.67e-07
ILMN_1766264	PI16	6	3.69325e+07	0.57	0.41 - 0.69	0.47 - 0.66	2.68e-07
ILMN_1708081	LCLAT1	2	3.08668e+07	0.601	0.44 - 0.72	0.49 - 0.73	2.74e-07
ILMN_2047511	ADAP1	7	1.37801e+08	0.573	0.42 - 0.69	0.47 - 0.69	2.9e-07
ILMN_1668063	FCN1	9	937570	0.632	0.47 - 0.75	0.52 - 0.74	2.9e-07
ILMN_1812433	HP	16	7.20945e+07	0.628	0.46 - 0.75	0.51 - 0.75	2.97e-07
ILMN_2178088	ZNF131	5	4.31754e+07	0.593	0.43 - 0.71	0.49 - 0.70	3.02e-07
ILMN_1691949	THOC3	5	1.75387e+08	0.615	0.45 - 0.73	0.50 - 0.72	3.52e-07
ILMN_1760727	ANG	14	2.11622e+07	0.603	0.44 - 0.72	0.47 - 0.72	3.6e-07
ILMN_2307025	CPNE1	20	3.42146e+07	0.597	0.43 - 0.72	0.47 - 0.71	3.67e-07
ILMN_1723116	AMFR	16	5.63958e+07	0.604	0.44 - 0.72	0.50 - 0.72	3.99e-07
ILMN_1679666	SCGB3A1	5	1.80018e+08	0.599	0.44 - 0.72	0.48 - 0.73	4.01e-07
ILMN_1807136	FLJ00313	1	1.6945e+07	0.622	0.46 - 0.74	0.52 - 0.73	4.22e-07
ILMN_1786426	IGFLR1	19	3.62304e+07	0.593	0.43 - 0.72	0.48 - 0.71	4.42e-07
ILMN_1790973	CDS2	20	5.17162e+06	0.58	0.42 - 0.70	0.48 - 0.68	4.46e-07
ILMN_3272768	HSPC157	1	2.23575e+07	0.58	0.42 - 0.70	0.46 - 0.70	4.57e-07
ILMN_1676042	ALOX15	17	7.00448e+07	0.571	0.41 - 0.69	0.45 - 0.69	4.6e-07
ILMN_1763823	AK127674	15	4.5336e+06	0.591	0.43 - 0.71	0.48 - 0.69	4.6e-07
ILMN_1791912	SIDT2	11	1.17068e+08	0.597	0.43 - 0.72	0.47 - 0.73	4.85e-07
ILMN_1668605	NAAA	4	76841911	0.561	0.40 - 0.68	0.45 - 0.71	5e-07
ILMN_1748034	KLHDC4	16	8.77415e+07	0.616	0.45 - 0.73	0.49 - 0.71	5.02e-07
ILMN_1733311	PIGB	15	5.5647e+07	0.55	0.40 - 0.67	0.44 - 0.66	5.28e-07
ILMN_1706635	ELANE	19	856204	0.603	0.44 - 0.72	0.46 - 0.74	5.28e-07
ILMN_2323944	FAM110A	20	826520	0.578	0.42 - 0.70	0.46 - 0.71	5.42e-07
ILMN_2150196	LRRC25	19	1.8502e+07	0.6	0.44 - 0.72	0.50 - 0.71	5.49e-07
ILMN_3243061	SIGLEC14	19	5.21459e+07	0.595	0.43 - 0.72	0.47 - 0.74	5.51e-07
ILMN_2242937	ARSB	5	1.97761e+07	0.575	0.41 - 0.70	0.46 - 0.68	5.76e-07
ILMN_1761044	GNB1L	22	7.80733e+07	0.606	0.44 - 0.73	0.50 - 0.71	5.76e-07
ILMN_2256295	GNLY	2	85922091	0.596	0.43 - 0.72	0.47 - 0.72	5.8e-07
ILMN_1665107	ITGB1BP1	2	165621271	0.573	0.41 - 0.70	0.43 - 0.71	5.82e-07
ILMN_1751956	MGST3	1	9.54611e+06	0.596	0.43 - 0.72	0.48 - 0.69	5.82e-07
ILMN_1767422	POLR1D	13	2.81975e+07	0.601	0.43 - 0.72	0.47 - 0.71	6.38e-07
ILMN_2104696	ERICH1	8	1.674e+08	0.561	0.40 - 0.68	0.43 - 0.66	6.44e-07
ILMN_2377669	CD247	1	614464	0.611	0.44 - 0.73	0.49 - 0.74	6.44e-07
ILMN_3226181	NUDT7	16	7.7776e+07	0.614	0.45 - 0.73	0.51 - 0.72	6.5e-07
ILMN_1712522	CEACAM6	19	4.22758e+07	0.584	0.42 - 0.71	0.47 - 0.69	6.94e-07
ILMN_2395981	PYHIN1	1	1.58915e+08	0.597	0.43 - 0.72	0.49 - 0.71	6.95e-07
ILMN_2376289	DBNL	7	4.41009e+07	0.583	0.42 - 0.70	0.47 - 0.69	7.11e-07
ILMN_1651385	MFN2	1	1.20731e+07	0.583	0.42 - 0.71	0.49 - 0.69	7.6e-07
ILMN_1723412	ASCL2	11	2.28995e+06	0.661	0.49 - 0.78	0.56 - 0.77	7.81e-07
ILMN_1722981	TLR5	1	1.60223e+06	0.569	0.41 - 0.69	0.46 - 0.67	8.38e-07
ILMN_2342068	ELKS	12	2.23284e+08	0.6	0.43 - 0.72	0.49 - 0.70	8.38e-07
ILMN_1809944	TRMT12	8	4.3571e+07	0.566	0.40 - 0.69	0.44 - 0.73	8.42e-07
ILMN_1721128	TOMM34	20	1.25465e+08	0.568	0.41 - 0.69	0.47 - 0.68	8.42e-07
ILMN_2209115	MAK	6	1.07633e+07	0.6	0.43 - 0.72	0.47 - 0.72	8.45e-07
ILMN_1701998	AFAP1	4	7.76049e+06	0.558	0.40 - 0.68	0.46 - 0.69	8.54e-07
ILMN_1769734	NT5C3	7	8.89038e+07	0.561	0.40 - 0.68	0.45 - 0.67	8.68e-07
ILMN_2410909	AKT1	14	1.05236e+08	0.577	0.41 - 0.70	0.46 - 0.69	8.68e-07
ILMN_1651354	SPP1	4	3.30553e+07	0.596	0.43 - 0.72	0.50 - 0.71	8.68e-07
ILMN_2242463	CTSC	11	8.80272e+07	0.595	0.43 - 0.72	0.47 - 0.70	8.82e-07
ILMN_1711994	TCIRG1	11	6.78181e+07	0.592	0.43 - 0.71	0.48 - 0.69	9.35e-07
ILMN_1664176	FBLN5	14	5.03675e+07	0.558	0.40 - 0.68	0.45 - 0.66	9.45e-07
ILMN_1734205	RASSF1	3	9.23365e+07	0.592	0.42 - 0.72	0.46 - 0.73	9.45e-07
ILMN_1666546	DUSP14	17	3.58733e+07	0.571	0.41 - 0.70	0.47 - 0.67	9.46e-07
ILMN_2382505	SLC22A18	11	2.94379e+06	0.616	0.44 - 0.74	0.49 - 0.73	9.49e-07
ILMN_1701512	KIAA0391	14	3.57431e+07	0.582	0.42 - 0.70	0.48 - 0.68	9.97e-07
ILMN_1692168	UBE2Z	17	4.70061e+07	0.545	0.39 - 0.67	0.42 - 0.71	1.06e-06
ILMN_1794364	CTSW	11	6.56512e+07	0.623	0.45 - 0.74	0.51 - 0.76	1.1e-06
ILMN_1723043	NAPSB	19	50840811	0.592	0.42 - 0.72	0.47 - 0.76	1.1e-06
ILMN_1734830	MTHFR	1	1.1847e+07	0.572	0.41 - 0.70	0.47 - 0.67	1.11e-06
ILMN_1775008	NCAPD2	12	6.6406e+06	0.569	0.40 - 0.69	0.45 - 0.68	1.15e-06
ILMN_3251269	SRP14	15	4.03281e+07	0.619	0.44 - 0.74	0.52 - 0.72	1.16e-06
ILMN_1663422	RGL4	22	2.40412e+07	0.591	0.42 - 0.72	0.45 - 0.75	1.18e-06
ILMN_2158336	SH3GLB2	9	1.3177e+08	0.578	0.41 - 0.70	0.46 - 0.70	1.22e-06
ILMN_3203189	MAP2K3	17	2.12043e+07	0.647	0.47 - 0.76	0.54 - 0.74	1.29e-06
ILMN_1659761	RUNDC2A	16	1.26679e+07	0.579	0.41 - 0.70	0.47 - 0.69	1.29e-06
ILMN_2285568	NAAA	4	76839914	0.541	0.38 - 0.67	0.41 - 0.71	1.32e-06
ILMN_2392189	CTDSPL	3	3.80258e+07	0.583	0.41 - 0.71	0.47 - 0.69	1.32e-06
ILMN_1673370	FBXL5	4	1.56064e+07	0.544	0.38 - 0.67	0.44 - 0.66	1.33e-06
ILMN_2372639	TRAPPC5	19	7.74747e+06	0.565	0.40 - 0.69	0.43 - 0.68	1.39e-06
ILMN_3241692	MICA	6	2.06678e+08	0.556	0.39 - 0.68	0.44 - 0.68	1.46e-06
ILMN_1773395	BLOC1S1-RDH5	12	5.61184e+07	0.575	0.41 - 0.70	0.46 - 0.70	1.46e-06
ILMN_1818577	AF088044	1	2.89283e+06	0.584	0.41 - 0.71	0.47 - 0.71	1.46e-06
ILMN_2053415	LDLR	19	1.12444e+07	0.561	0.40 - 0.69	0.44 - 0.68	1.47e-06
ILMN_1716913	TRAPPC1	17	7.83377e+06	0.543	0.38 - 0.67	0.42 - 0.68	1.5e-06
ILMN_1657996	C6orf214	6	2.11472e+06	0.557	0.39 - 0.68	0.43 - 0.67	1.52e-06
ILMN_1911677	AK056689	13	7.4834e+07	0.586	0.41 - 0.71	0.46 - 0.72	1.56e-06
ILMN_3236970	LOC339290	18	5.24635e+06	0.528	0.37 - 0.65	0.42 - 0.65	1.61e-06
ILMN_1655195	SMA4	5	69517766	0.56	0.39 - 0.69	0.45 - 0.69	1.61e-06
ILMN_2323385	TRIM4	7	9.94887e+07	0.583	0.41 - 0.71	0.47 - 0.68	1.62e-06
ILMN_1784863	CD36	7	8.03059e+07	0.618	0.44 - 0.74	0.48 - 0.73	1.63e-06
ILMN_1723235	DUS3L	19	5785637	0.548	0.39 - 0.67	0.43 - 0.66	1.65e-06
ILMN_2098947	AK095700	12	8.6337e+06	0.521	0.36 - 0.65	0.39 - 0.66	1.77e-06
ILMN_3235584	TRIM66	11	1.22234e+08	0.572	0.40 - 0.70	0.45 - 0.68	1.77e-06
ILMN_1724406	INO80E	16	3.67009e+07	0.542	0.38 - 0.67	0.42 - 0.66	1.77e-06
ILMN_2123450	AK125083	6	3.00167e+07	0.543	0.38 - 0.67	0.44 - 0.65	1.77e-06
ILMN_1756920	ADAM15	1	1.55035e+08	0.596	0.42 - 0.72	0.47 - 0.71	1.82e-06
ILMN_1657145	MEOX1	17	4.1718e+07	0.548	0.39 - 0.67	0.43 - 0.66	1.85e-06
ILMN_1695851	PARVG	22	1.25158e+08	0.59	0.42 - 0.72	0.47 - 0.71	1.91e-06
ILMN_2339835	PTGS1	9	4.46024e+07	0.611	0.43 - 0.74	0.46 - 0.72	1.91e-06
ILMN_2390310	MIR22HG	17	1.61509e+06	0.552	0.39 - 0.68	0.43 - 0.71	1.94e-06
ILMN_1682368	LRWD1	7	1.02113e+08	0.548	0.39 - 0.67	0.43 - 0.65	1.94e-06
ILMN_1716547	NAGK	2	7.13056e+07	0.571	0.40 - 0.70	0.46 - 0.67	1.97e-06
ILMN_1674650	C9orf95	9	7.76762e+07	0.562	0.39 - 0.69	0.45 - 0.66	1.98e-06
ILMN_1658016	ZNF831	20	5.78309e+07	0.556	0.39 - 0.68	0.44 - 0.65	2.02e-06
ILMN_2090802	TMEM79	1	1.56262e+08	0.545	0.38 - 0.67	0.44 - 0.64	2.03e-06
ILMN_3307868	CHI3L1	1	2.03148e+08	0.572	0.40 - 0.70	0.43 - 0.69	2.11e-06
ILMN_1729281	SPHK2	19	4.91336e+07	0.556	0.39 - 0.68	0.44 - 0.65	2.21e-06
ILMN_1752340	ARF5	7	1.27231e+08	0.531	0.37 - 0.66	0.39 - 0.68	2.26e-06
ILMN_1690139	KIAA0748	12	5.53437e+07	0.605	0.43 - 0.73	0.47 - 0.73	2.3e-06
ILMN_1657317	POLR2J	7	1.02114e+08	0.544	0.38 - 0.67	0.43 - 0.65	2.31e-06
ILMN_1693192	PI3	20	4.38047e+07	0.543	0.38 - 0.67	0.42 - 0.65	2.41e-06
ILMN_1811102	LRSAM1	9	1.30266e+08	0.537	0.37 - 0.66	0.42 - 0.65	2.46e-06
ILMN_2368530	IL32	16	3.11821e+06	0.551	0.38 - 0.68	0.43 - 0.65	2.5e-06
ILMN_1778734	FAN1	15	3.12352e+07	0.551	0.39 - 0.68	0.43 - 0.66	2.5e-06
ILMN_1748915	S100A12	1	3.32463e+07	0.53	0.37 - 0.66	0.40 - 0.65	2.53e-06
ILMN_1690682	B3GALT4	6	1.53346e+08	0.547	0.38 - 0.68	0.42 - 0.66	2.53e-06
ILMN_2154287	ACCS	11	4.41053e+07	0.564	0.39 - 0.69	0.40 - 0.70	2.56e-06
ILMN_3247633	BPI	20	36953230	0.566	0.40 - 0.69	0.43 - 0.68	2.76e-06
ILMN_1670398	BCR	22	2.36578e+07	0.591	0.42 - 0.72	0.47 - 0.69	2.8e-06
ILMN_1672504	PDXK	21	4.51821e+07	0.579	0.41 - 0.71	0.47 - 0.70	2.88e-06
ILMN_1769412	RAPGEF1	9	1.34452e+08	0.542	0.38 - 0.67	0.45 - 0.66	2.9e-06
ILMN_1743205	ABCA7	19	1.06515e+06	0.562	0.39 - 0.69	0.46 - 0.66	2.94e-06
ILMN_1700477	MRPL43	10	1.02747e+08	0.571	0.40 - 0.70	0.42 - 0.78	2.96e-06
ILMN_1803686	ADA	20	43248941	0.591	0.42 - 0.72	0.46 - 0.73	2.98e-06
ILMN_2294976	ANG	14	2.11617e+07	0.528	0.36 - 0.66	0.42 - 0.64	3.06e-06
ILMN_2364535	SNUPN	15	7.58907e+07	0.558	0.39 - 0.68	0.46 - 0.66	3.12e-06
ILMN_1686626	DDX39B	6	2.82901e+06	0.53	0.36 - 0.66	0.43 - 0.64	3.22e-06
ILMN_1658399	KLRG1	12	9.16242e+06	0.54	0.38 - 0.67	0.44 - 0.65	3.25e-06
ILMN_1675038	PRMT2	21	4.80845e+07	0.56	0.39 - 0.69	0.44 - 0.69	3.26e-06
ILMN_1762764	SH3BGRL2	6	8.04133e+07	0.552	0.38 - 0.68	0.43 - 0.67	3.36e-06
ILMN_1662427	PTP4A3	8	1.42441e+08	0.543	0.38 - 0.67	0.41 - 0.71	3.38e-06
ILMN_2402806	TRPC4AP	20	3.35906e+07	0.543	0.38 - 0.67	0.43 - 0.65	3.45e-06
ILMN_1655525	FLCN	17	1.71248e+07	0.551	0.38 - 0.68	0.45 - 0.65	3.62e-06
ILMN_1655684	SARS2	19	3.9406e+07	0.545	0.38 - 0.67	0.44 - 0.66	3.75e-06
ILMN_1656900	SULT1A1	16	2.86174e+07	0.603	0.42 - 0.73	0.48 - 0.72	3.79e-06
ILMN_2255579	RAB37	17	7.27433e+07	0.584	0.41 - 0.72	0.48 - 0.68	3.92e-06
ILMN_2336335	MARCH8	10	4.59531e+07	0.554	0.38 - 0.69	0.40 - 0.67	3.96e-06
ILMN_1666206	GSDMB	17	3.8061e+07	0.562	0.39 - 0.69	0.43 - 0.70	3.99e-06
ILMN_1718621	TSPAN32	11	2.3393e+06	0.538	0.37 - 0.67	0.43 - 0.67	4.07e-06
ILMN_1792455	TMEM158	3	4.5266e+07	0.556	0.39 - 0.69	0.46 - 0.65	4.14e-06
ILMN_2358560	TIAM2	6	1.55578e+08	0.569	0.40 - 0.70	0.43 - 0.68	4.17e-06
ILMN_2148944	ADCY4	14	2.47877e+07	0.568	0.40 - 0.69	0.45 - 0.67	4.24e-06
ILMN_1792538	CD7	17	8.02728e+07	0.542	0.37 - 0.67	0.43 - 0.64	4.32e-06
ILMN_2208495	LASS5	12	5.05239e+07	0.518	0.36 - 0.65	0.42 - 0.63	4.34e-06
ILMN_2315694	STRADA	17	6.17803e+07	0.539	0.37 - 0.67	0.40 - 0.64	4.65e-06
ILMN_1798620	PQLC1	18	7.76626e+07	0.548	0.38 - 0.68	0.41 - 0.66	4.65e-06
ILMN_2322806	CAST	5	9.61101e+07	0.542	0.37 - 0.68	0.41 - 0.66	4.67e-06
ILMN_1664828	APOBEC3H	22	3.94998e+07	0.56	0.39 - 0.69	0.44 - 0.68	4.71e-06
ILMN_1805737	PFKP	10	3.17874e+06	0.544	0.37 - 0.67	0.42 - 0.68	4.76e-06
ILMN_1715013	ERMAP	1	4.33103e+07	0.543	0.37 - 0.67	0.42 - 0.68	4.77e-06
ILMN_3251317	RER1	1	2.33619e+06	0.494	0.34 - 0.62	0.37 - 0.65	4.8e-06
ILMN_2309848	FXYD5	19	3.56607e+07	0.561	0.39 - 0.69	0.43 - 0.67	4.96e-06
ILMN_2409384	SIGLEC7	19	5.16565e+07	0.553	0.38 - 0.68	0.43 - 0.67	4.98e-06
ILMN_1752755	VWF	12	6.0581e+06	0.591	0.41 - 0.72	0.45 - 0.70	5.16e-06
ILMN_1781010	ARHGEF3	3	5.67616e+07	0.553	0.38 - 0.68	0.45 - 0.67	5.24e-06
ILMN_2323979	WARS2	1	1.19574e+08	0.519	0.36 - 0.65	0.42 - 0.61	5.42e-06
ILMN_2112049	DNLZ	9	1.39256e+08	0.58	0.40 - 0.71	0.45 - 0.70	5.46e-06
ILMN_1668825	DKFZp686I15217	6	2.99078e+06	0.559	0.38 - 0.70	0.39 - 0.72	5.48e-06
ILMN_1806408	ACADVL	17	7.12846e+06	0.6	0.42 - 0.73	0.47 - 0.74	5.66e-06
ILMN_2110908	MYC	8	1.28753e+08	0.569	0.39 - 0.70	0.44 - 0.68	5.86e-06
ILMN_1663866	TGFBI	5	1.35399e+08	0.611	0.43 - 0.74	0.49 - 0.72	6.02e-06
ILMN_2109708	TYMP	22	5.09642e+07	0.523	0.36 - 0.65	0.41 - 0.63	6.28e-06
ILMN_1761138	C9orf142	9	1.39888e+08	0.57	0.39 - 0.70	0.42 - 0.74	6.28e-06
ILMN_2216157	GNA12	7	2.76791e+06	0.542	0.37 - 0.67	0.43 - 0.67	6.31e-06
ILMN_1713266	FAM46C	1	1.18171e+08	0.549	0.37 - 0.68	0.41 - 0.65	6.47e-06
ILMN_1731503	MARCO	2	1.19752e+08	0.547	0.37 - 0.68	0.41 - 0.66	6.55e-06
ILMN_1704870	PGLYRP1	19	4.65225e+07	0.567	0.39 - 0.70	0.42 - 0.68	6.62e-06
ILMN_1670841	CPNE1	20	3.42141e+07	0.578	0.40 - 0.71	0.41 - 0.74	6.65e-06
ILMN_3241091	TMEM164	X	1.09421e+08	0.534	0.36 - 0.67	0.42 - 0.68	6.71e-06
ILMN_1728799	FBP1	9	9.73657e+07	0.571	0.39 - 0.70	0.44 - 0.66	6.92e-06
ILMN_1793894	ANAPC13	3	2.1303e+08	0.549	0.37 - 0.68	0.42 - 0.67	6.97e-06
ILMN_1652825	IL10RA	11	378034	0.566	0.39 - 0.70	0.46 - 0.68	6.97e-06
ILMN_2370091	NGFRAP1	X	2.42048e+08	0.576	0.39 - 0.71	0.45 - 0.71	6.97e-06
ILMN_1754858	PASK	2	1.02633e+08	0.577	0.40 - 0.71	0.45 - 0.76	6.97e-06
ILMN_1787815	TRIB3	20	1.17872e+08	0.59	0.40 - 0.72	0.46 - 0.70	6.97e-06
ILMN_1782178	LQK1	1	1.34197e+08	0.601	0.42 - 0.73	0.50 - 0.71	6.97e-06
ILMN_1776188	MAP1LC3A	20	3.31481e+07	0.603	0.42 - 0.73	0.47 - 0.74	7.12e-06
ILMN_1705066	BTBD11	12	1.48564e+08	0.52	0.35 - 0.65	0.41 - 0.65	7.19e-06
ILMN_1758626	IDS	X	1.08053e+08	0.563	0.38 - 0.70	0.42 - 0.70	7.19e-06
ILMN_2310896	NLRP3	1	2.47612e+08	0.575	0.40 - 0.71	0.44 - 0.71	7.21e-06
ILMN_1805449	TAPBPL	12	4.65819e+07	0.533	0.36 - 0.66	0.43 - 0.63	7.21e-06
ILMN_1769911	SLC38A1	12	6.57137e+06	0.569	0.39 - 0.70	0.47 - 0.67	7.21e-06
ILMN_1811426	TMTC1	12	2.96544e+07	0.532	0.36 - 0.66	0.42 - 0.65	7.22e-06
ILMN_2157075	LRCH4	7	1.00172e+08	0.521	0.35 - 0.65	0.40 - 0.63	7.25e-06
ILMN_1729112	CHPT1	12	102114025	0.574	0.39 - 0.71	0.42 - 0.71	7.28e-06
ILMN_1721762	IL18RAP	2	1.03069e+08	0.517	0.35 - 0.65	0.39 - 0.67	7.3e-06
ILMN_1704063	KCNH3	12	4.9952e+07	0.549	0.38 - 0.68	0.45 - 0.64	7.38e-06
ILMN_1737818	C12orf43	12	3.14334e+07	0.525	0.36 - 0.66	0.39 - 0.67	7.44e-06
ILMN_1803945	HCP5	6	1.21441e+08	0.529	0.36 - 0.66	0.41 - 0.65	7.44e-06
ILMN_1704305	NIP7	16	6.93768e+07	0.541	0.37 - 0.67	0.43 - 0.65	7.52e-06
ILMN_1697377	ANKRD36B	2	9.81659e+07	0.513	0.35 - 0.65	0.39 - 0.65	7.54e-06
ILMN_2079803	LSM14A	19	3.47201e+07	0.522	0.35 - 0.66	0.37 - 0.69	7.62e-06
ILMN_1651254	LPP	3	1.88596e+08	0.536	0.36 - 0.67	0.41 - 0.66	7.86e-06
ILMN_1758806	C21orf2	21	1.82017e+06	0.524	0.36 - 0.65	0.41 - 0.63	7.93e-06
ILMN_1811574	MAPK8IP3	16	4.57489e+07	0.525	0.35 - 0.66	0.40 - 0.66	7.93e-06
ILMN_1682993	NKG7	19	5.18751e+07	0.559	0.38 - 0.69	0.41 - 0.71	8.05e-06
ILMN_1791754	CPT1B	22	5.10078e+07	0.517	0.35 - 0.65	0.41 - 0.64	8.1e-06
ILMN_2337655	WARS	14	1.008e+08	0.56	0.38 - 0.69	0.45 - 0.67	8.11e-06
ILMN_3245066	DENND4B	1	1.53902e+08	0.543	0.37 - 0.67	0.44 - 0.64	8.12e-06
ILMN_2055156	PAG1	8	8.18803e+07	0.57	0.39 - 0.70	0.45 - 0.69	8.22e-06
ILMN_1726030	GPX7	1	5.30743e+07	0.506	0.34 - 0.64	0.41 - 0.61	8.37e-06
ILMN_2230902	CTNNA1	5	1.38271e+08	0.517	0.34 - 0.65	0.37 - 0.66	8.4e-06
ILMN_1797530	CHCHD5	2	1.13344e+08	0.522	0.35 - 0.66	0.41 - 0.65	8.48e-06
ILMN_1799856	NOMO3	16	1.85115e+07	0.568	0.39 - 0.70	0.45 - 0.69	8.53e-06
ILMN_3244521	LOC283267	11	3.31007e+07	0.536	0.37 - 0.67	0.41 - 0.67	8.55e-06
ILMN_2091920	PTCRA	6	4.28935e+07	0.546	0.37 - 0.68	0.41 - 0.68	8.85e-06
ILMN_2042595	PCM1	8	17883164	0.522	0.35 - 0.66	0.41 - 0.66	8.89e-06
ILMN_1755737	TRABD	22	5.00468e+07	0.494	0.33 - 0.63	0.40 - 0.58	9.03e-06
ILMN_1809850	RCN3	19	5.0638e+07	0.526	0.36 - 0.66	0.42 - 0.63	9.03e-06
ILMN_1780861	METRNL	17	8.10528e+07	0.575	0.39 - 0.71	0.45 - 0.71	9.06e-06
ILMN_1741404	MSC	8	7.27542e+07	0.579	0.40 - 0.71	0.45 - 0.69	9.1e-06
ILMN_1676924	CD247	1	1.674e+08	0.565	0.39 - 0.70	0.44 - 0.69	9.21e-06
ILMN_2307032	OSBPL5	11	3.10846e+06	0.57	0.39 - 0.70	0.44 - 0.70	9.28e-06
ILMN_1675062	MYL9	20	3.51781e+07	0.559	0.38 - 0.69	0.42 - 0.68	9.33e-06
ILMN_1897741	CR610863	5	1.04378e+07	0.57	0.39 - 0.70	0.43 - 0.71	9.46e-06
ILMN_1787529	C3AR1	12	8.2111e+06	0.528	0.35 - 0.66	0.40 - 0.65	9.5e-06
ILMN_1764970	JMJD1C	10	6.49274e+07	0.549	0.37 - 0.68	0.42 - 0.67	9.61e-06
ILMN_1807372	ADORA2A	22	2.4838e+07	0.549	0.37 - 0.68	0.42 - 0.69	9.65e-06
ILMN_1795949	CORO7	16	4.40478e+06	0.535	0.36 - 0.67	0.42 - 0.64	9.69e-06
ILMN_1783158	LY6G6F	6	31678177	0.519	0.35 - 0.65	0.40 - 0.64	9.72e-06
ILMN_3246247	PKD1P1	16	16427607	0.544	0.37 - 0.68	0.42 - 0.69	9.88e-06
ILMN_2379599	CD163	12	7635248	0.536	0.36 - 0.67	0.41 - 0.66	1.01e-05
ILMN_1666089	OLIG1	21	3.44444e+07	0.56	0.38 - 0.70	0.42 - 0.69	1.02e-05
ILMN_1844611		20	3.07043e+07	0.547	0.37 - 0.68	0.42 - 0.66	1.03e-05
ILMN_1763322	CCR3	3	4.63078e+07	0.547	0.37 - 0.68	0.41 - 0.72	1.04e-05
ILMN_2410783	GAA	17	7.80933e+07	0.573	0.39 - 0.71	0.45 - 0.67	1.08e-05
ILMN_1739749	B3GALT6	1	3.29207e+06	0.533	0.36 - 0.67	0.40 - 0.68	1.1e-05
ILMN_2115752	MEFV	16	1.17015e+06	0.547	0.37 - 0.68	0.42 - 0.70	1.1e-05
ILMN_1682818	ARPC4	3	9.87684e+06	0.53	0.36 - 0.66	0.42 - 0.63	1.1e-05
ILMN_1776640	MPL	1	4.38201e+07	0.541	0.36 - 0.68	0.42 - 0.65	1.11e-05
ILMN_1675391	SLC24A4	14	9.29623e+07	0.537	0.36 - 0.67	0.41 - 0.67	1.12e-05
ILMN_1748291	C1orf55	1	2.26171e+08	0.519	0.35 - 0.65	0.41 - 0.63	1.12e-05
ILMN_2210729	STYXL1	7	7.56303e+07	0.562	0.38 - 0.70	0.43 - 0.69	1.13e-05
ILMN_3293681	LOC390940	19	4.40858e+07	0.53	0.36 - 0.66	0.41 - 0.65	1.15e-05
ILMN_2373982	PICK1	22	3.84717e+07	0.516	0.34 - 0.65	0.39 - 0.63	1.17e-05
ILMN_3239965	IDO1	8	3.97855e+07	0.529	0.35 - 0.67	0.40 - 0.68	1.18e-05
ILMN_3266186	HDAC7	12	8.04008e+07	0.507	0.34 - 0.64	0.38 - 0.62	1.19e-05
ILMN_1750401	C17orf62	17	4.81771e+07	0.53	0.35 - 0.66	0.41 - 0.65	1.19e-05
ILMN_1715991	SDPR	2	2.15593e+08	0.501	0.33 - 0.63	0.37 - 0.65	1.19e-05
ILMN_1675617	NT5M	17	1.72507e+07	0.527	0.35 - 0.66	0.40 - 0.65	1.19e-05
ILMN_2074258	BARD1	2	1.92699e+08	0.563	0.38 - 0.70	0.42 - 0.68	1.19e-05
ILMN_1731233	GZMH	14	1.25316e+08	0.53	0.36 - 0.66	0.40 - 0.66	1.21e-05
ILMN_1779071	FEZ1	11	2.50758e+07	0.58	0.40 - 0.71	0.46 - 0.70	1.21e-05
ILMN_1705183	MPO	17	5.63477e+07	0.536	0.36 - 0.67	0.40 - 0.66	1.21e-05
ILMN_1776602	ANG	14	2.11684e+07	0.531	0.35 - 0.67	0.42 - 0.65	1.21e-05
ILMN_1714602	CD86	3	1.2184e+08	0.516	0.35 - 0.65	0.42 - 0.62	1.21e-05
ILMN_1796423	CLIC3	9	1.39889e+08	0.54	0.36 - 0.68	0.41 - 0.67	1.24e-05
ILMN_1766637	GLA	X	1.00653e+08	0.568	0.38 - 0.70	0.40 - 0.72	1.24e-05
ILMN_1664956	SSU72	1	1.47717e+06	0.549	0.37 - 0.68	0.42 - 0.65	1.26e-05
ILMN_1747160	SYT15	10	4.69555e+07	0.549	0.37 - 0.68	0.41 - 0.70	1.26e-05
ILMN_1777565	TAP2	6	4.02569e+06	0.539	0.36 - 0.67	0.42 - 0.67	1.27e-05
ILMN_1755582	PCSK1N	X	4.86903e+07	0.512	0.34 - 0.65	0.35 - 0.64	1.29e-05
ILMN_1774596	BSCL2	11	6.24578e+07	0.517	0.34 - 0.65	0.39 - 0.66	1.35e-05
ILMN_1741165	SLC11A1	2	2.1926e+08	0.553	0.37 - 0.69	0.43 - 0.68	1.37e-05
ILMN_1749403	TSPAN33	7	1.28809e+08	0.556	0.37 - 0.69	0.42 - 0.69	1.37e-05
ILMN_1716382	C12orf75	12	7.80934e+07	0.576	0.39 - 0.71	0.43 - 0.71	1.38e-05
ILMN_1765801	GAA	17	1.05765e+08	0.578	0.39 - 0.71	0.45 - 0.70	1.38e-05
ILMN_1797341	ARID1A	1	2.71083e+07	0.536	0.35 - 0.68	0.40 - 0.65	1.4e-05
ILMN_1670899	FBN2	5	1.28449e+08	0.525	0.35 - 0.66	0.39 - 0.67	1.41e-05
ILMN_1764861	ISOC1	5	1.27594e+08	0.559	0.37 - 0.70	0.43 - 0.68	1.41e-05
ILMN_1847047	BX106738	7	1.50488e+08	0.512	0.34 - 0.65	0.41 - 0.64	1.45e-05
ILMN_1795639	MGMT	10	1.31565e+08	0.549	0.37 - 0.69	0.41 - 0.67	1.47e-05
ILMN_1694966	ASGR2	17	7.00487e+06	0.52	0.34 - 0.66	0.39 - 0.65	1.47e-05
ILMN_1717207	MMP25	16	3.11055e+06	0.53	0.35 - 0.67	0.38 - 0.65	1.48e-05
ILMN_1798654	MCM6	2	1.36598e+08	0.512	0.34 - 0.65	0.39 - 0.63	1.51e-05
ILMN_2352097	GPR56	16	5.76987e+07	0.571	0.39 - 0.71	0.44 - 0.70	1.53e-05
ILMN_1731433	ABP1	7	1.50558e+08	0.499	0.33 - 0.63	0.36 - 0.63	1.54e-05
ILMN_1734353	GPX4	19	1105792	0.523	0.35 - 0.66	0.40 - 0.65	1.55e-05
ILMN_1681016	SPNS1	16	2.89958e+07	0.499	0.33 - 0.63	0.39 - 0.61	1.57e-05
ILMN_2140700	CRIPAK	4	1.38949e+06	0.518	0.34 - 0.65	0.39 - 0.63	1.6e-05
ILMN_1738347	RNPEP	1	5.20976e+07	0.534	0.36 - 0.67	0.41 - 0.67	1.66e-05
ILMN_1770811	PELO	5	2.01975e+08	0.538	0.35 - 0.68	0.40 - 0.68	1.66e-05
ILMN_1782257	METTL17	14	6.88558e+07	0.51	0.34 - 0.65	0.39 - 0.62	1.68e-05
ILMN_1726873	TPCN2	11	2.14648e+07	0.544	0.36 - 0.68	0.42 - 0.67	1.68e-05
ILMN_1651964	ABCC5	3	1.83702e+08	0.483	0.32 - 0.62	0.36 - 0.61	1.69e-05
ILMN_1807737	SFRS17A	X	1.7209e+06	0.49	0.32 - 0.63	0.39 - 0.58	1.73e-05
ILMN_1779228	CDH2	18	2.5531e+07	0.518	0.34 - 0.66	0.38 - 0.66	1.74e-05
ILMN_1683390	FLCN	17	17140231	0.526	0.35 - 0.66	0.40 - 0.63	1.75e-05
ILMN_1728517	FNTB	14	6.55292e+07	0.503	0.33 - 0.64	0.37 - 0.60	1.76e-05
ILMN_1729987	SRC	20	3.60335e+07	0.551	0.37 - 0.69	0.42 - 0.67	1.79e-05
ILMN_1656670	HLA-G	6	1.31457e+06	0.572	0.38 - 0.71	0.44 - 0.71	1.8e-05
ILMN_1806733	COL18A1	21	4.69335e+07	0.549	0.37 - 0.69	0.41 - 0.71	1.81e-05
ILMN_1870041	AJ227862	5	5.47407e+07	0.541	0.36 - 0.68	0.41 - 0.70	1.83e-05
ILMN_3251658	LILRA6	19	1.02119e+08	0.554	0.37 - 0.69	0.40 - 0.72	1.83e-05
ILMN_1677814	ABCC3	17	48768815	0.576	0.39 - 0.71	0.41 - 0.69	1.84e-05
ILMN_1685580	CBLB	3	1.05377e+08	0.503	0.33 - 0.64	0.38 - 0.64	1.86e-05
ILMN_1659703	WWP2	16	6.9944e+07	0.516	0.34 - 0.65	0.41 - 0.63	1.87e-05
ILMN_1787541	SPSB2	12	1.48118e+08	0.492	0.33 - 0.62	0.38 - 0.61	1.88e-05
ILMN_2400759	CPVL	7	2.90702e+07	0.508	0.33 - 0.65	0.39 - 0.63	1.88e-05
ILMN_1690223	CNTNAP2	7	6.98037e+06	0.523	0.35 - 0.66	0.39 - 0.66	1.88e-05
ILMN_2184064	ARRDC4	15	9.85166e+07	0.539	0.36 - 0.68	0.39 - 0.67	1.9e-05
ILMN_1782273	N4BP2	4	467130	0.513	0.34 - 0.65	0.38 - 0.63	1.95e-05
ILMN_1789419	EXOC3	5	4.01562e+07	0.526	0.35 - 0.66	0.39 - 0.64	1.95e-05
ILMN_1725417	NELL2	12	4.49024e+07	0.544	0.36 - 0.69	0.40 - 0.67	1.95e-05
ILMN_1801428	KRT77	12	5.3084e+07	0.49	0.32 - 0.63	0.37 - 0.62	2e-05
ILMN_1802027	MGST2	4	140624690	0.513	0.34 - 0.65	0.39 - 0.62	2.01e-05
ILMN_1784948	SPOCD1	1	3.22561e+07	0.507	0.33 - 0.64	0.39 - 0.64	2.01e-05
ILMN_1784203	ACRBP	12	1.06238e+07	0.528	0.35 - 0.67	0.40 - 0.71	2.01e-05
ILMN_1775235	AFF3	2	4.4226e+07	0.533	0.35 - 0.67	0.37 - 0.70	2.01e-05
ILMN_1717313	NFKBIE	6	1.00164e+08	0.558	0.37 - 0.69	0.41 - 0.70	2.01e-05
ILMN_2073184	S1PR5	19	6.74751e+06	0.562	0.37 - 0.70	0.44 - 0.68	2.01e-05
ILMN_3248649	MYO15B	17	7.36226e+07	0.512	0.34 - 0.65	0.38 - 0.64	2.04e-05
ILMN_1737949	GALNS	16	1.28064e+08	0.481	0.31 - 0.62	0.35 - 0.61	2.07e-05
ILMN_1765122	MAP3K2	2	8.88803e+07	0.528	0.35 - 0.66	0.38 - 0.68	2.07e-05
ILMN_1714809	RPIA	2	8.90502e+07	0.554	0.37 - 0.69	0.43 - 0.67	2.09e-05
ILMN_2102693	NUFIP2	17	1.62092e+08	0.499	0.33 - 0.63	0.37 - 0.62	2.14e-05
ILMN_1794726	RNF167	17	4.84842e+06	0.508	0.33 - 0.65	0.36 - 0.68	2.14e-05
ILMN_2292387	TANK	2	2.75888e+07	0.511	0.33 - 0.65	0.40 - 0.63	2.14e-05
ILMN_2077680	CLDND2	19	5.18704e+07	0.563	0.37 - 0.70	0.41 - 0.74	2.15e-05
ILMN_1743836	MXRA7	17	7.46721e+07	0.554	0.37 - 0.69	0.43 - 0.67	2.19e-05
ILMN_2345142	SULF2	20	4.62864e+07	0.567	0.37 - 0.71	0.45 - 0.70	2.25e-05
ILMN_1674574	VNN1	6	1.33003e+08	0.527	0.34 - 0.67	0.41 - 0.64	2.25e-05
ILMN_1716973	POLM	7	4.20447e+07	0.529	0.35 - 0.67	0.38 - 0.65	2.32e-05
ILMN_1658494	C13orf15	13	4.41121e+07	0.546	0.36 - 0.69	0.39 - 0.66	2.32e-05
ILMN_1675190	RETN	19	7.73473e+06	0.503	0.33 - 0.64	0.37 - 0.64	2.36e-05
ILMN_1713731	ALOX12	17	6.91369e+06	0.519	0.34 - 0.66	0.39 - 0.63	2.39e-05
ILMN_1737631	PAQR6	1	1.56214e+08	0.487	0.32 - 0.63	0.36 - 0.62	2.42e-05
ILMN_1772644	EML3	11	6.23697e+07	0.531	0.35 - 0.67	0.40 - 0.64	2.43e-05
ILMN_1731001	ERICH1	8	618610	0.494	0.32 - 0.63	0.38 - 0.60	2.43e-05
ILMN_1780774	NPCR	3	5.99567e+07	0.488	0.32 - 0.63	0.38 - 0.61	2.44e-05
ILMN_2074762	FCRL6	1	1.59785e+08	0.543	0.36 - 0.68	0.41 - 0.67	2.44e-05
ILMN_1719158	CTBP1	4	1.20544e+06	0.518	0.34 - 0.65	0.36 - 0.68	2.45e-05
ILMN_1690963	ASAP1	8	1.31065e+08	0.523	0.34 - 0.66	0.40 - 0.64	2.5e-05
ILMN_1778488	WDR41	5	7.67282e+07	0.495	0.32 - 0.64	0.36 - 0.61	2.52e-05
ILMN_1685631	MAU2	19	1.94692e+07	0.549	0.36 - 0.69	0.41 - 0.67	2.55e-05
ILMN_2154052	KDSR	18	6.09984e+07	0.53	0.35 - 0.67	0.41 - 0.69	2.55e-05
ILMN_1663437	NECAB2	16	4.06936e+07	0.539	0.36 - 0.68	0.41 - 0.65	2.59e-05
ILMN_1795930	PTGER4	5	8.40363e+07	0.551	0.36 - 0.69	0.44 - 0.67	2.59e-05
ILMN_1680624	CREG1	1	1.43833e+08	0.549	0.36 - 0.69	0.42 - 0.67	2.6e-05
ILMN_1724266	LYPD2	8	1.67511e+08	0.581	0.38 - 0.72	0.43 - 0.71	2.6e-05
ILMN_1671568	ECHDC2	1	5.3362e+07	0.49	0.32 - 0.63	0.36 - 0.61	2.6e-05
ILMN_3244323	hCG_20425	1	1.50872e+08	0.502	0.33 - 0.64	0.36 - 0.64	2.62e-05
ILMN_2124471	SLC36A1	5	1.33725e+06	0.529	0.34 - 0.67	0.40 - 0.67	2.62e-05
ILMN_1731275	DPEP3	16	6.80096e+07	0.511	0.34 - 0.65	0.38 - 0.63	2.66e-05
ILMN_1657892	TLR8	X	1.29409e+07	0.509	0.33 - 0.65	0.37 - 0.64	2.68e-05
ILMN_2125010	SKAP2	7	2.67071e+07	0.496	0.32 - 0.64	0.35 - 0.63	2.69e-05
ILMN_1700428	HLA-DOB	6	4.2118e+06	0.491	0.32 - 0.62	0.36 - 0.64	2.77e-05
ILMN_1709634	CMBL	5	1.02796e+07	0.506	0.33 - 0.65	0.37 - 0.63	2.81e-05
ILMN_1726989	C1orf86	1	1.16857e+07	0.497	0.32 - 0.63	0.35 - 0.62	2.83e-05
ILMN_2078599	ACP5	19	2.11598e+06	0.518	0.34 - 0.66	0.37 - 0.65	2.83e-05
ILMN_2388507	AKT1	14	1.05236e+08	0.49	0.32 - 0.63	0.36 - 0.61	2.85e-05
ILMN_1654518	SAP25	7	2.94693e+07	0.49	0.32 - 0.63	0.38 - 0.59	2.86e-05
ILMN_1684628	ZFP90	16	6.86009e+07	0.556	0.36 - 0.70	0.43 - 0.69	2.86e-05
ILMN_2368575	SLX1B-SULT1A4	16	1.0017e+08	0.576	0.39 - 0.71	0.42 - 0.70	2.86e-05
ILMN_1673509	RPL28	19	5.59032e+07	0.518	0.34 - 0.66	0.38 - 0.66	2.89e-05
ILMN_1741483	HPS1	10	1.00189e+08	0.49	0.32 - 0.63	0.38 - 0.60	2.92e-05
ILMN_1775182	GSR	8	3.0537e+07	0.49	0.32 - 0.63	0.37 - 0.61	2.95e-05
ILMN_3238221	FLJ42627	16	2.69583e+06	0.519	0.34 - 0.65	0.37 - 0.65	2.97e-05
ILMN_1662587	PNPLA7	9	1.40354e+08	0.511	0.33 - 0.65	0.39 - 0.63	2.99e-05
ILMN_1813275	DUSP22	6	351292	0.511	0.33 - 0.65	0.38 - 0.63	3.06e-05
ILMN_1796762	CCDC102A	16	5.75463e+07	0.519	0.34 - 0.66	0.40 - 0.63	3.07e-05
ILMN_1690546	PPP3CC	8	2.23982e+07	0.524	0.34 - 0.66	0.40 - 0.66	3.13e-05
ILMN_1773313	MIR1307	10	1.05154e+08	0.565	0.37 - 0.71	0.47 - 0.66	3.14e-05
ILMN_1651373	RHD	1	2.56332e+07	0.51	0.33 - 0.65	0.39 - 0.62	3.14e-05
ILMN_1768099	SCGB1C1	11	194510	0.529	0.35 - 0.67	0.41 - 0.66	3.15e-05
ILMN_1750273	RPL23AP7	2	114384627	0.51	0.33 - 0.65	0.39 - 0.63	3.22e-05
ILMN_1795963	OSGIN1	16	8.39999e+07	0.508	0.33 - 0.65	0.37 - 0.64	3.27e-05
ILMN_2343618	SAMD3	6	1.30648e+08	0.507	0.33 - 0.65	0.38 - 0.64	3.29e-05
ILMN_1691736	ST6GALNAC6	9	1.30506e+08	0.51	0.33 - 0.65	0.40 - 0.61	3.29e-05
ILMN_1703335	LACTB	15	6.34338e+07	0.524	0.34 - 0.66	0.41 - 0.64	3.36e-05
ILMN_1790555	CCDC146	7	7.69241e+07	0.529	0.34 - 0.67	0.40 - 0.65	3.36e-05
ILMN_1657993	ADNP	20	2.08768e+07	0.497	0.32 - 0.64	0.37 - 0.60	3.39e-05
ILMN_1690442	C18orf45	18	4.95073e+07	0.52	0.34 - 0.66	0.40 - 0.65	3.39e-05
ILMN_3247848	UNQ2487	19	52207719	0.487	0.31 - 0.63	0.35 - 0.67	3.41e-05
ILMN_1745994	GAS7	17	9.81435e+06	0.527	0.34 - 0.67	0.38 - 0.65	3.47e-05
ILMN_1695423	CD9	12	6.34445e+06	0.502	0.32 - 0.64	0.39 - 0.62	3.49e-05
ILMN_1691508	PLAUR	19	4.41506e+07	0.544	0.36 - 0.68	0.42 - 0.66	3.56e-05
ILMN_2247664	SON	21	3.49494e+07	0.5	0.32 - 0.64	0.35 - 0.64	3.56e-05
ILMN_3238814	SMA4	5	1.02118e+08	0.49	0.32 - 0.63	0.37 - 0.65	3.6e-05
ILMN_1702738	KLC3	19	8.63933e+07	0.511	0.33 - 0.65	0.38 - 0.64	3.6e-05
ILMN_2199439	CA2	8	4.58542e+07	0.518	0.33 - 0.66	0.38 - 0.67	3.6e-05
ILMN_2202940	CHPT1	12	69423485	0.531	0.34 - 0.67	0.39 - 0.65	3.6e-05
ILMN_1724609	SLC2A8	9	1.3017e+08	0.515	0.33 - 0.66	0.38 - 0.67	3.71e-05
ILMN_1728845	SMARCD1	12	5.04943e+07	0.499	0.32 - 0.64	0.39 - 0.60	3.74e-05
ILMN_1723115	CLEC4F	2	7.1036e+07	0.506	0.33 - 0.65	0.36 - 0.67	3.85e-05
ILMN_1761945	FGFBP2	4	1.59641e+07	0.527	0.34 - 0.67	0.40 - 0.65	3.87e-05
ILMN_1746148	LRRC33	3	1.79275e+07	0.496	0.32 - 0.64	0.35 - 0.64	3.87e-05
ILMN_1671486	HOMER2	15	8.35179e+07	0.516	0.33 - 0.66	0.36 - 0.66	3.87e-05
ILMN_2226271	INSL3	19	1.96389e+08	0.533	0.35 - 0.67	0.41 - 0.65	3.87e-05
ILMN_1766803	TUBGCP6	22	5.06564e+07	0.487	0.31 - 0.63	0.35 - 0.61	3.89e-05
ILMN_1679826	CST7	20	2.49404e+07	0.505	0.32 - 0.65	0.38 - 0.64	4e-05
ILMN_1656676	ZYG11B	1	5.32913e+07	0.537	0.35 - 0.68	0.42 - 0.66	4e-05
ILMN_1761259	EXT2	11	4.42668e+07	0.485	0.31 - 0.63	0.37 - 0.60	4.01e-05
ILMN_1750785	SYTL1	1	8.53915e+07	0.5	0.32 - 0.64	0.35 - 0.64	4.01e-05
ILMN_1699226	UBR4	1	1.94033e+07	0.517	0.33 - 0.66	0.38 - 0.65	4.01e-05
ILMN_1660462	MCOLN2	1	27678031	0.534	0.34 - 0.68	0.40 - 0.65	4.01e-05
ILMN_1776515	MPPE1	18	1.18841e+07	0.524	0.34 - 0.67	0.39 - 0.68	4.15e-05
ILMN_1662741	LPAR2	19	1.97346e+07	0.521	0.34 - 0.66	0.40 - 0.63	4.18e-05
ILMN_1660544	ARRDC4	15	9.85164e+07	0.495	0.32 - 0.64	0.38 - 0.62	4.19e-05
ILMN_2221046	GM2A	5	1.50648e+08	0.53	0.35 - 0.67	0.40 - 0.64	4.24e-05
ILMN_1669592	MARCH2	19	8.50333e+06	0.521	0.34 - 0.66	0.38 - 0.66	4.24e-05
ILMN_2249018	LRRC26	9	8.96039e+07	0.503	0.33 - 0.64	0.37 - 0.69	4.26e-05
ILMN_1675583	SPG7	16	1.40063e+08	0.531	0.34 - 0.67	0.39 - 0.65	4.26e-05
ILMN_1699636	ACIN1	14	2.35281e+07	0.501	0.32 - 0.64	0.37 - 0.62	4.3e-05
ILMN_1708485	BIN3	8	2.24782e+07	0.481	0.31 - 0.62	0.36 - 0.58	4.32e-05
ILMN_1769433	IQGAP2	5	7.60038e+07	0.494	0.31 - 0.64	0.35 - 0.66	4.32e-05
ILMN_1728197	CLDN5	22	1.95107e+07	0.572	0.37 - 0.71	0.42 - 0.70	4.36e-05
ILMN_2271149	PGM5	9	7.11457e+07	0.542	0.35 - 0.69	0.41 - 0.67	4.38e-05
ILMN_1712088	CLYBL	13	1.00544e+08	0.503	0.32 - 0.65	0.35 - 0.64	4.44e-05
ILMN_1655572	C6orf59	6	1.61582e+08	0.536	0.35 - 0.68	0.39 - 0.67	4.47e-05
ILMN_2041236	RAP1GAP2	17	2.94072e+06	0.49	0.31 - 0.63	0.35 - 0.64	4.49e-05
ILMN_1755843	SLC26A8	6	3.59115e+07	0.521	0.33 - 0.67	0.38 - 0.66	4.52e-05
ILMN_3251137	METTL21A	2	2.08474e+08	0.486	0.31 - 0.63	0.36 - 0.60	4.58e-05
ILMN_1743290	GP9	3	1.28781e+08	0.518	0.33 - 0.66	0.37 - 0.67	4.62e-05
ILMN_3239060	KRBA1	7	1.49432e+08	0.507	0.33 - 0.65	0.39 - 0.63	4.63e-05
ILMN_1721842	RYBP	3	7.24262e+07	0.515	0.33 - 0.66	0.40 - 0.64	4.65e-05
ILMN_2282077	MIB2	1	1.56578e+06	0.493	0.32 - 0.63	0.37 - 0.61	4.65e-05
ILMN_1800626	SESN1	6	1.09308e+08	0.493	0.32 - 0.63	0.36 - 0.63	4.76e-05
ILMN_1783996	DEM1	1	9.06476e+07	0.5	0.32 - 0.64	0.41 - 0.60	4.78e-05
ILMN_2285817	FAM89A	1	3.36985e+07	0.524	0.34 - 0.67	0.38 - 0.65	4.78e-05
ILMN_2127605	LRP3	19	2.31155e+08	0.524	0.33 - 0.67	0.35 - 0.67	4.78e-05
ILMN_1701933	SNCA	4	4.09815e+07	0.527	0.34 - 0.67	0.39 - 0.65	4.78e-05
ILMN_1654612	ZNF589	3	4.83123e+07	0.492	0.32 - 0.63	0.37 - 0.62	4.8e-05
ILMN_1784428	MGC57346	17	4.37151e+07	0.499	0.32 - 0.64	0.38 - 0.62	4.83e-05
ILMN_2192281	CARD8	19	4.87116e+07	0.501	0.32 - 0.65	0.37 - 0.71	4.83e-05
ILMN_2186877	EBLN2	3	7.31123e+07	0.488	0.31 - 0.63	0.37 - 0.60	4.97e-05
ILMN_2403906	ARFIP1	4	1.53833e+08	0.476	0.30 - 0.62	0.35 - 0.62	5.01e-05
ILMN_1663068	C1orf228	1	1.02973e+08	0.481	0.31 - 0.62	0.35 - 0.62	5.02e-05
ILMN_2306540	PDE9A	21	264042	0.501	0.32 - 0.65	0.39 - 0.64	5.02e-05
ILMN_1713803	C17orf97	17	4.41955e+07	0.502	0.32 - 0.64	0.38 - 0.61	5.02e-05
ILMN_2048607	ANKRD9	14	4.5191e+07	0.53	0.34 - 0.68	0.40 - 0.64	5.02e-05
ILMN_1718766	MT1F	16	5.66931e+07	0.491	0.31 - 0.63	0.38 - 0.60	5.05e-05
ILMN_1812552	ACER3	11	7.67337e+07	0.502	0.32 - 0.64	0.38 - 0.62	5.06e-05
ILMN_1708934	ADM	11	1.03288e+07	0.508	0.32 - 0.65	0.36 - 0.62	5.08e-05
ILMN_1767612	BBS2	16	5.65195e+07	0.503	0.32 - 0.65	0.39 - 0.61	5.13e-05
ILMN_1727271	WARS	14	64088528	0.513	0.33 - 0.66	0.40 - 0.61	5.14e-05
ILMN_1874689	AB074162	9	1.28329e+08	0.515	0.33 - 0.66	0.38 - 0.67	5.14e-05
ILMN_2122103	ETS1	11	1.27423e+08	0.518	0.33 - 0.67	0.38 - 0.65	5.14e-05
ILMN_2383975	PRDX5	11	1.008e+08	0.529	0.34 - 0.67	0.40 - 0.67	5.14e-05
ILMN_1730487	CALD1	7	2.03136e+08	0.474	0.30 - 0.61	0.34 - 0.60	5.16e-05
ILMN_1747227	ADORA1	1	1.34655e+08	0.48	0.30 - 0.62	0.36 - 0.60	5.16e-05
ILMN_1713384	TSHZ2	20	5.2106e+07	0.533	0.34 - 0.68	0.40 - 0.66	5.17e-05
ILMN_1688231	TREM1	6	4.12438e+07	0.523	0.34 - 0.67	0.38 - 0.66	5.19e-05
ILMN_2093775	ZNF831	20	5.7834e+07	0.513	0.33 - 0.66	0.38 - 0.64	5.24e-05
ILMN_1773865	HSPA5	9	1.27997e+08	0.476	0.30 - 0.62	0.33 - 0.65	5.25e-05
ILMN_1804396	IRF2BPL	14	7.74914e+07	0.532	0.34 - 0.68	0.40 - 0.70	5.26e-05
ILMN_1730568	ZDHHC7	16	85008323	0.514	0.33 - 0.66	0.37 - 0.63	5.3e-05
ILMN_1779043	CACNG6	19	5.45158e+07	0.459	0.29 - 0.60	0.31 - 0.62	5.36e-05
ILMN_1719649	TMEM63A	1	6.52093e+06	0.479	0.31 - 0.62	0.36 - 0.61	5.37e-05
ILMN_1806710	ESPN	1	2.26034e+08	0.481	0.31 - 0.62	0.36 - 0.61	5.37e-05
ILMN_1697268	EMILIN2	18	2.91395e+06	0.501	0.32 - 0.64	0.37 - 0.62	5.37e-05
ILMN_1709237	EPHX2	8	2.74021e+07	0.518	0.33 - 0.66	0.35 - 0.67	5.37e-05
ILMN_3182422	C1orf86	1	2.11597e+06	0.506	0.33 - 0.65	0.39 - 0.62	5.38e-05
ILMN_1695978	LINGO2	9	2.79487e+07	0.506	0.32 - 0.65	0.39 - 0.64	5.41e-05
ILMN_1701441	LPAR1	9	1.13636e+08	0.515	0.33 - 0.66	0.38 - 0.63	5.41e-05
ILMN_1811927	OR2W3	1	2.4806e+08	0.483	0.31 - 0.62	0.35 - 0.60	5.42e-05
ILMN_2378952	GPX4	19	1.10642e+06	0.527	0.34 - 0.67	0.38 - 0.69	5.42e-05
ILMN_1715969	SLC25A37	8	2.34295e+07	0.485	0.31 - 0.63	0.35 - 0.60	5.49e-05
ILMN_1720857	SMA4	5	69517770	0.497	0.32 - 0.64	0.37 - 0.62	5.5e-05
ILMN_1721626	ARID5B	10	6.38563e+07	0.509	0.32 - 0.65	0.37 - 0.72	5.68e-05
ILMN_3215715	LAP3	4	1.76002e+07	0.473	0.30 - 0.62	0.35 - 0.59	5.81e-05
ILMN_2062468	IGFBP7	4	5.78994e+07	0.524	0.33 - 0.67	0.38 - 0.67	5.85e-05
ILMN_3245057	ASAP1	8	1.31065e+08	0.503	0.32 - 0.65	0.37 - 0.63	5.91e-05
ILMN_1720270	CDR2	16	2.23575e+07	0.495	0.31 - 0.64	0.37 - 0.59	5.97e-05
ILMN_1802151	OSBPL5	11	3.10858e+06	0.539	0.34 - 0.68	0.38 - 0.71	5.98e-05
ILMN_1784287	TGFBR3	1	9.21482e+07	0.518	0.33 - 0.66	0.39 - 0.65	6.11e-05
ILMN_1694223	DGCR8	22	1.04661e+07	0.496	0.32 - 0.64	0.36 - 0.62	6.13e-05
ILMN_1656477	ARSA	22	5.10644e+07	0.501	0.32 - 0.64	0.35 - 0.67	6.13e-05
ILMN_1799134	KLRD1	12	2.00992e+07	0.531	0.34 - 0.67	0.40 - 0.67	6.13e-05
ILMN_2319000	MATK	19	3.43435e+07	0.524	0.33 - 0.67	0.37 - 0.70	6.14e-05
ILMN_1778347	NUDT2	9	3.778e+06	0.535	0.34 - 0.68	0.41 - 0.68	6.14e-05
ILMN_2076463	SLC15A4	12	1.29278e+08	0.508	0.32 - 0.65	0.38 - 0.64	6.17e-05
ILMN_1786328	DCAF12	9	3.40867e+07	0.519	0.33 - 0.66	0.38 - 0.64	6.19e-05
ILMN_1784608	CLEC2B	12	1.00052e+07	0.496	0.31 - 0.64	0.39 - 0.60	6.3e-05
ILMN_1719185	BC063630	19	867900	0.518	0.33 - 0.66	0.41 - 0.63	6.35e-05
ILMN_1764709	MAFB	20	3.93148e+07	0.517	0.33 - 0.66	0.39 - 0.68	6.42e-05
ILMN_1767481	XRCC6BP1	12	58347468	0.507	0.32 - 0.65	0.39 - 0.62	6.43e-05
ILMN_3251565	RNASEH2C	11	6.54856e+07	0.527	0.33 - 0.67	0.38 - 0.68	6.44e-05
ILMN_2109489	GZMB	14	2.51002e+07	0.534	0.34 - 0.68	0.41 - 0.68	6.53e-05
ILMN_2145280	DEF6	6	1.18767e+08	0.483	0.31 - 0.62	0.35 - 0.63	6.54e-05
ILMN_2337928	CXCR5	11	35289471	0.53	0.34 - 0.67	0.39 - 0.65	6.54e-05
ILMN_1845157	TTC15	2	8.63932e+07	0.464	0.29 - 0.60	0.35 - 0.60	6.56e-05
ILMN_2206272	D2HGDH	2	1.01948e+07	0.494	0.31 - 0.64	0.39 - 0.60	6.56e-05
ILMN_1751656	KLF11	2	2.42708e+08	0.498	0.32 - 0.64	0.36 - 0.63	6.56e-05
ILMN_1662795	CA2	8	3.48868e+06	0.522	0.33 - 0.67	0.37 - 0.67	6.56e-05
ILMN_1747460	TMEM184B	22	3.86157e+07	0.503	0.32 - 0.65	0.38 - 0.62	6.56e-05
ILMN_1709348	ALDH1A1	9	7.90099e+06	0.491	0.31 - 0.63	0.34 - 0.63	6.66e-05
ILMN_1718932	MTRR	5	7.55245e+07	0.503	0.32 - 0.65	0.36 - 0.63	6.66e-05
ILMN_1753002	RAB2B	14	2.19273e+07	0.511	0.32 - 0.66	0.36 - 0.65	6.68e-05
ILMN_3262348	IP6K2	3	4.87312e+07	0.488	0.31 - 0.63	0.37 - 0.60	6.69e-05
ILMN_2193325	MMP23B	1	1570008	0.526	0.33 - 0.68	0.37 - 0.70	6.71e-05
ILMN_1748591	ODC1	2	1.05809e+07	0.498	0.31 - 0.64	0.36 - 0.62	6.82e-05
ILMN_1659766	BAG3	10	1.21437e+08	0.516	0.32 - 0.66	0.37 - 0.69	6.86e-05
ILMN_1758293	UBR7	14	9.36867e+07	0.478	0.30 - 0.62	0.36 - 0.61	6.89e-05
ILMN_1723768	NLRX1	11	1.19055e+08	0.49	0.31 - 0.63	0.35 - 0.65	6.91e-05
ILMN_2331163	CUL4A	13	2.19211e+08	0.49	0.31 - 0.63	0.37 - 0.61	7.06e-05
ILMN_3181347	LOC100129827	11	1.06157e+07	0.512	0.33 - 0.65	0.37 - 0.65	7.06e-05
ILMN_1774604	PNKD	2	1.13919e+08	0.52	0.33 - 0.67	0.38 - 0.67	7.06e-05
ILMN_3251737	EEF1A1	6	7.42255e+07	0.51	0.32 - 0.66	0.37 - 0.67	7.09e-05
ILMN_1687268	SEC14L5	16	5.06912e+06	0.491	0.30 - 0.64	0.35 - 0.60	7.09e-05
ILMN_2384122	GPR56	16	5.76986e+07	0.538	0.34 - 0.68	0.39 - 0.69	7.15e-05
ILMN_1756086	INTS3	1	1.53746e+08	0.503	0.32 - 0.65	0.38 - 0.62	7.29e-05
ILMN_1712305	CYBRD1	2	121231777	0.49	0.31 - 0.63	0.36 - 0.66	7.33e-05
ILMN_1844464	IL23A	7	1.72414e+08	0.501	0.32 - 0.65	0.38 - 0.62	7.33e-05
ILMN_2127722	FAM174A	5	9.99221e+07	0.54	0.34 - 0.69	0.38 - 0.70	7.5e-05
ILMN_1803197	RAB3IP	12	7.02092e+07	0.478	0.30 - 0.62	0.35 - 0.62	7.53e-05
ILMN_1717163	F13A1	6	6.14491e+06	0.495	0.31 - 0.64	0.35 - 0.63	7.55e-05
ILMN_1737252	NRG1	8	3.25855e+07	0.5	0.31 - 0.64	0.37 - 0.65	7.72e-05
ILMN_1732885	SLX4	16	3.63131e+06	0.483	0.30 - 0.62	0.35 - 0.61	7.73e-05
ILMN_1706261	SLCO3A1	15	8.87632e+07	0.495	0.31 - 0.64	0.37 - 0.64	7.83e-05
ILMN_1695356	RNF166	16	9.27153e+07	0.505	0.32 - 0.65	0.36 - 0.64	7.83e-05
ILMN_1803609	XKR3	22	1.72647e+07	0.482	0.30 - 0.63	0.34 - 0.60	7.83e-05
ILMN_1803819	IQGAP1	15	9.10451e+07	0.45	0.28 - 0.59	0.29 - 0.59	7.83e-05
ILMN_1794968	LRRC28	15	1.42292e+06	0.513	0.33 - 0.66	0.38 - 0.62	7.89e-05
ILMN_2366719	NSFL1C	20	9.99264e+07	0.525	0.34 - 0.67	0.39 - 0.66	7.89e-05
ILMN_1813641	C9orf167	9	1.40177e+08	0.461	0.29 - 0.60	0.34 - 0.58	8.07e-05
ILMN_1800787	RFTN1	3	1.63574e+07	0.511	0.32 - 0.65	0.39 - 0.62	8.15e-05
ILMN_1834842	BX093900	6	1.97034e+07	0.488	0.31 - 0.63	0.35 - 0.65	8.16e-05
ILMN_1663519	SLC24A3	20	3.65789e+07	0.506	0.32 - 0.65	0.38 - 0.63	8.16e-05
ILMN_1696463	SPI1	11	4.73765e+07	0.515	0.32 - 0.66	0.39 - 0.65	8.3e-05
ILMN_2290628	IL16	15	8.16008e+07	0.51	0.32 - 0.66	0.39 - 0.62	8.33e-05
ILMN_1669635	NUP85	17	7.32308e+07	0.472	0.29 - 0.61	0.32 - 0.63	8.4e-05
ILMN_1779147	ENC1	5	1.69473e+06	0.471	0.29 - 0.61	0.34 - 0.59	8.5e-05
ILMN_2055700	SLBP	4	7.39235e+07	0.477	0.29 - 0.62	0.34 - 0.60	8.5e-05
ILMN_1810836	PDE5A	4	1.20416e+08	0.47	0.29 - 0.61	0.32 - 0.63	8.53e-05
ILMN_2183938	LEMD3	12	6.5642e+07	0.513	0.32 - 0.66	0.39 - 0.64	8.73e-05
ILMN_1796409	C1QB	1	2.29878e+07	0.479	0.30 - 0.63	0.34 - 0.63	8.85e-05
ILMN_2158003	KIAA1683	19	1.8368e+07	0.447	0.28 - 0.59	0.32 - 0.58	9.01e-05
ILMN_1776080	GTPBP6	X	1.03183e+08	0.46	0.29 - 0.60	0.29 - 0.61	9.02e-05
ILMN_2233539	SLC39A8	4	221480	0.515	0.32 - 0.66	0.36 - 0.69	9.02e-05
ILMN_1731785	ORM2	9	1.17094e+08	0.49	0.30 - 0.64	0.36 - 0.60	9.1e-05
ILMN_1811443	AVP	20	1.36664e+08	0.468	0.29 - 0.61	0.34 - 0.60	9.17e-05
ILMN_1712719	MAP7	6	3.0653e+06	0.474	0.29 - 0.62	0.36 - 0.58	9.17e-05
ILMN_1809495	COX8A	11	6.37423e+07	0.457	0.28 - 0.60	0.30 - 0.61	9.43e-05
ILMN_1729179	SPATA5L1	15	4.57108e+07	0.478	0.30 - 0.62	0.35 - 0.59	9.61e-05
ILMN_1731666	ZNF641	12	4.87361e+07	0.493	0.31 - 0.64	0.36 - 0.61	9.62e-05
ILMN_2258774	MRPL43	10	1.02746e+08	0.491	0.30 - 0.64	0.37 - 0.62	9.67e-05
ILMN_2175020	RPL32P3	3	1.29102e+08	0.485	0.30 - 0.63	0.35 - 0.64	9.68e-05
ILMN_1768867	AP3B1	5	7.72985e+07	0.472	0.29 - 0.62	0.34 - 0.60	9.68e-05
ILMN_1723004	CD72	9	3.56106e+07	0.451	0.28 - 0.59	0.34 - 0.57	9.77e-05
ILMN_1754179	AP1G2	14	2.40292e+07	0.477	0.30 - 0.62	0.35 - 0.61	9.78e-05
ILMN_1731064	ADCK3	1	2.27175e+08	0.488	0.30 - 0.63	0.35 - 0.62	9.81e-05
ILMN_1896455	BX096301	11	6.55387e+07	0.482	0.30 - 0.63	0.36 - 0.60	9.91e-05
ILMN_2338921	C4orf41	4	1.84635e+08	0.507	0.31 - 0.66	0.38 - 0.63	9.95e-05
ILMN_1720344	NIPA2	15	2.30056e+07	0.448	0.28 - 0.59	0.34 - 0.57	0.000100822
ILMN_2367638	CAMKK2	12	1.21693e+08	0.481	0.30 - 0.63	0.35 - 0.62	0.000101106
ILMN_1675386	CES1	16	3.76457e+06	0.449	0.28 - 0.59	0.33 - 0.57	0.000101253
ILMN_1664028	CENPB	20	5.58601e+07	0.473	0.29 - 0.62	0.34 - 0.61	0.000101253
ILMN_1695246	KLHDC8B	3	4.92137e+07	0.48	0.30 - 0.63	0.35 - 0.61	0.000101744
ILMN_2345353	LST1	6	1.2259e+08	0.479	0.30 - 0.62	0.37 - 0.59	0.000102064
ILMN_1741003	ANXA5	4	2.93615e+06	0.483	0.30 - 0.63	0.34 - 0.63	0.000102064
ILMN_1766797	CCS	11	3.43402e+07	0.468	0.29 - 0.61	0.34 - 0.58	0.00010294
ILMN_1676973	CABP5	19	4.85334e+07	0.502	0.31 - 0.65	0.35 - 0.67	0.00010294
ILMN_1686109	CCL23	17	6.63734e+07	0.505	0.32 - 0.65	0.35 - 0.63	0.00010294
ILMN_1811387	TFF3	21	4.37322e+07	0.544	0.34 - 0.69	0.38 - 0.67	0.000103635
ILMN_1722158	CASP5	11	1.04867e+08	0.464	0.29 - 0.61	0.35 - 0.59	0.000103962
ILMN_1690487	PCM1	8	1.78723e+07	0.467	0.29 - 0.61	0.33 - 0.61	0.000104041
ILMN_1680344	MYOM1	18	3.06689e+06	0.499	0.31 - 0.64	0.36 - 0.64	0.000104305
ILMN_1766185	AXIN1	16	337652	0.492	0.31 - 0.64	0.36 - 0.64	0.00010441
ILMN_1694084	CYTH1	17	6.0999e+07	0.453	0.28 - 0.60	0.33 - 0.58	0.00010545
ILMN_1727539	PGA4	11	7.66704e+07	0.461	0.28 - 0.60	0.32 - 0.62	0.00010545
ILMN_1704537	PHGDH	1	1.20287e+08	0.469	0.29 - 0.61	0.35 - 0.61	0.000106427
ILMN_1672443	QDPR	4	1.51078e+08	0.468	0.29 - 0.61	0.36 - 0.59	0.00010662
ILMN_2285618	DIP2A	21	6.26465e+07	0.47	0.29 - 0.61	0.33 - 0.61	0.00010662
ILMN_3246900	LOC92249	X	4.79885e+07	0.477	0.30 - 0.62	0.34 - 0.65	0.00010662
ILMN_1700248	WDR86	7	17488459	0.495	0.31 - 0.64	0.37 - 0.61	0.00010662
ILMN_1764228	DAB2	5	3.93732e+07	0.519	0.32 - 0.67	0.37 - 0.65	0.000106713
ILMN_2289093	RNF213	17	7.82952e+07	0.468	0.29 - 0.61	0.33 - 0.60	0.00010742
ILMN_1740772	APBB3	5	1.39938e+08	0.483	0.30 - 0.63	0.38 - 0.59	0.000107729
ILMN_1774091	FECH	18	5.52156e+07	0.488	0.30 - 0.64	0.37 - 0.60	0.000107843
ILMN_1669447	PYHIN1	1	7.25568e+07	0.486	0.30 - 0.63	0.36 - 0.62	0.000108085
ILMN_3182768	CD300H	17	1.58947e+08	0.494	0.30 - 0.64	0.35 - 0.61	0.000108085
ILMN_1684349	IL2RB	22	3.75222e+07	0.491	0.30 - 0.64	0.35 - 0.63	0.000108463
ILMN_1687301	VCAN	5	8.28769e+07	0.485	0.30 - 0.63	0.37 - 0.60	0.000110209
ILMN_2195236	PGRMC2	4	1.29191e+08	0.474	0.29 - 0.62	0.36 - 0.58	0.000110376
ILMN_2061565	PLCH2	1	2.43688e+06	0.517	0.32 - 0.67	0.37 - 0.70	0.000110421
ILMN_1795419	CNPPD1	2	2.20037e+08	0.478	0.29 - 0.63	0.33 - 0.60	0.0001106
ILMN_3246910	LOC100190986	16	2.14437e+07	0.469	0.29 - 0.61	0.36 - 0.58	0.000111187
ILMN_1787885	NUDT18	8	2.19645e+07	0.488	0.30 - 0.63	0.35 - 0.67	0.000111405
ILMN_1868851	BM716742	20	4.75883e+06	0.475	0.30 - 0.62	0.35 - 0.60	0.000111531
ILMN_1672389	CRYZ	1	7.51714e+07	0.488	0.30 - 0.64	0.34 - 0.61	0.000112045
ILMN_1773125	ENTPD1	10	3.18281e+07	0.503	0.31 - 0.65	0.38 - 0.60	0.00011319
ILMN_1909770	AK024852	19	9.76262e+07	0.533	0.34 - 0.68	0.38 - 0.68	0.00011319
ILMN_1691276	CXXC1	18	4.78088e+07	0.459	0.28 - 0.60	0.34 - 0.59	0.000113269
ILMN_1676010	SP1	12	5.381e+07	0.497	0.31 - 0.64	0.35 - 0.63	0.000113605
ILMN_1738047	FAM170B	10	5.03395e+07	0.452	0.28 - 0.59	0.34 - 0.57	0.000113655
ILMN_1664826	FBXO33	14	169132	0.472	0.29 - 0.62	0.35 - 0.59	0.000114191
ILMN_2273447	C16orf35	16	3.98672e+07	0.493	0.31 - 0.64	0.36 - 0.65	0.000114191
ILMN_1753712	STX10	19	1.32553e+07	0.47	0.29 - 0.62	0.36 - 0.58	0.000114414
ILMN_2330861	SMC4	3	1.60152e+08	0.509	0.32 - 0.66	0.39 - 0.63	0.00011467
ILMN_1766123	FHIT	3	5.97352e+07	0.47	0.29 - 0.62	0.36 - 0.59	0.000117225
ILMN_1815057	PDGFRB	5	1.49494e+08	0.528	0.33 - 0.68	0.36 - 0.66	0.000120237
ILMN_1780141	TMEM66	8	2.99209e+07	0.466	0.29 - 0.61	0.34 - 0.59	0.000120574
ILMN_1761260	COBLL1	2	1.65541e+08	0.483	0.30 - 0.63	0.34 - 0.63	0.000120674
ILMN_1705746	LSG1	3	1.94362e+08	0.498	0.31 - 0.64	0.36 - 0.66	0.000120684
ILMN_2226324	BRP44L	6	1.66779e+08	0.476	0.29 - 0.62	0.35 - 0.64	0.000121547
ILMN_1691111	SPATA2L	16	8.97628e+07	0.47	0.29 - 0.62	0.34 - 0.60	0.000121707
ILMN_1769895	CCR2	3	4.6402e+07	0.467	0.28 - 0.61	0.32 - 0.62	0.000123759
ILMN_2053829	CBLN3	14	2.48958e+07	0.509	0.32 - 0.66	0.39 - 0.65	0.00012505
ILMN_2124082	PPP2R5B	11	6.47017e+07	0.473	0.29 - 0.62	0.33 - 0.60	0.000126744
ILMN_1811104	MDSRP	3	1.19212e+08	0.486	0.30 - 0.63	0.36 - 0.59	0.000127306
ILMN_1812070	ABCB1	7	1.00758e+08	0.46	0.28 - 0.60	0.34 - 0.58	0.000130954
ILMN_2350801	SLC25A29	14	8.71336e+07	0.498	0.31 - 0.64	0.35 - 0.68	0.000130954
ILMN_2393573	RASSF1	3	5.03677e+07	0.52	0.32 - 0.67	0.36 - 0.67	0.000133347
ILMN_1737611	VAMP1	12	6.57158e+06	0.438	0.27 - 0.58	0.31 - 0.56	0.000133766
ILMN_2112256	TNFRSF4	1	1.14675e+06	0.477	0.29 - 0.62	0.35 - 0.60	0.000133831
ILMN_3307827	DNAJC4	11	6.40003e+07	0.466	0.28 - 0.61	0.34 - 0.61	0.000134208
ILMN_1737738	NDUFA12	12	9.53974e+07	0.477	0.29 - 0.62	0.34 - 0.63	0.000134625
ILMN_1671554	LPIN1	2	1.19672e+07	0.492	0.30 - 0.64	0.37 - 0.61	0.000135157
ILMN_1805395	LTBP3	11	6.53069e+07	0.46	0.28 - 0.60	0.33 - 0.60	0.000135671
ILMN_1699772	RRAGD	6	9.00778e+07	0.473	0.29 - 0.62	0.36 - 0.60	0.000135995
ILMN_1736976	HPCAL4	1	4.01447e+07	0.52	0.32 - 0.67	0.40 - 0.64	0.000136362
ILMN_1652906	GBGT1	9	1.36028e+08	0.47	0.29 - 0.62	0.35 - 0.59	0.000136444
ILMN_1773650	LRRN3	7	1.10765e+08	0.494	0.30 - 0.64	0.33 - 0.65	0.000137667
ILMN_2400219	SRI	7	8.78347e+07	0.465	0.28 - 0.61	0.33 - 0.63	0.000137751
ILMN_1762316	CPSF3L	1	1.24717e+06	0.5	0.31 - 0.65	0.35 - 0.62	0.000138032
ILMN_1778032	SURF6	9	1.36198e+08	0.486	0.30 - 0.64	0.35 - 0.62	0.000138783
ILMN_2143795	NCRNA00152	2	8.78209e+07	0.511	0.32 - 0.66	0.36 - 0.67	0.000139824
ILMN_1805643	RILPL1	12	1.23957e+08	0.456	0.28 - 0.60	0.33 - 0.57	0.000141754
ILMN_1798233	PSMB9	6	3.28274e+07	0.456	0.27 - 0.60	0.33 - 0.57	0.00014331
ILMN_1663407	SURF1	9	1.36219e+08	0.47	0.29 - 0.62	0.34 - 0.62	0.000143423
ILMN_2336781	SOD2	6	160105886	0.501	0.31 - 0.65	0.35 - 0.66	0.000143578
ILMN_1717029	AX746675	2	2.42816e+08	0.488	0.30 - 0.64	0.36 - 0.64	0.000146655
ILMN_1805922	EBPL	13	5.02353e+07	0.474	0.29 - 0.62	0.35 - 0.61	0.000147122
ILMN_1742230	BAZ1A	14	3.52222e+07	0.461	0.28 - 0.61	0.31 - 0.61	0.000149186
ILMN_1762713	C19orf59	19	7.74456e+06	0.47	0.29 - 0.62	0.35 - 0.61	0.000149248
ILMN_1681304	PAN3	13	6.48589e+07	0.468	0.28 - 0.62	0.35 - 0.60	0.00014972
ILMN_1651347	SERTAD2	2	2.8869e+07	0.502	0.30 - 0.66	0.38 - 0.62	0.00014972
ILMN_1768271	SMAP1	6	7.15713e+07	0.501	0.31 - 0.65	0.34 - 0.63	0.000149749
ILMN_1669881	TSPAN13	7	1.83906e+07	0.45	0.27 - 0.59	0.31 - 0.61	0.000149876
ILMN_2406439	SPTBN4	19	5.28473e+07	0.46	0.28 - 0.61	0.32 - 0.57	0.000149876
ILMN_1812297	CYP26B1	2	4.2579e+07	0.471	0.29 - 0.62	0.33 - 0.62	0.000149876
ILMN_2199389	VIPR1	3	7.23568e+07	0.472	0.29 - 0.62	0.35 - 0.59	0.000149876
ILMN_1718525	ITIH4	3	4.10662e+07	0.491	0.30 - 0.64	0.34 - 0.63	0.000149876
ILMN_1810214	JUND	19	1.68234e+07	0.503	0.31 - 0.66	0.36 - 0.62	0.000149876
ILMN_1668374	ITGB5	3	1.24482e+08	0.504	0.31 - 0.66	0.35 - 0.66	0.000150979
ILMN_2339202	KTN1	14	5.61464e+07	0.489	0.30 - 0.64	0.33 - 0.62	0.000151042
ILMN_1661589	CD151	11	5.62071e+07	0.449	0.27 - 0.59	0.31 - 0.57	0.000151637
ILMN_1772981	EPN1	19	834558	0.515	0.31 - 0.67	0.36 - 0.65	0.000151637
ILMN_1686884	IL1RAP	3	1.90369e+08	0.482	0.29 - 0.63	0.36 - 0.60	0.000152549
ILMN_1805561	SLC14A1	18	4.33305e+07	0.518	0.31 - 0.68	0.36 - 0.64	0.000153768
ILMN_1700147	VPREB3	22	2.40951e+07	0.472	0.29 - 0.62	0.36 - 0.58	0.000155617
ILMN_1750130	GSPT1	16	411524	0.477	0.29 - 0.63	0.34 - 0.60	0.000156313
ILMN_1684391	PLOD1	1	1.20355e+07	0.488	0.30 - 0.64	0.34 - 0.64	0.000156313
ILMN_1751330	RBCK1	20	1.19666e+07	0.497	0.30 - 0.65	0.35 - 0.63	0.000156313
ILMN_1777740	C8orf55	8	1.43818e+08	0.442	0.27 - 0.58	0.31 - 0.58	0.000156357
ILMN_2057566	PGP	16	2.26216e+06	0.497	0.30 - 0.65	0.36 - 0.63	0.0001567
ILMN_1653319	MC1R	16	8.99873e+07	0.459	0.28 - 0.61	0.31 - 0.63	0.000156715
ILMN_1720542	POLR2I	19	8.08973e+07	0.478	0.29 - 0.63	0.33 - 0.62	0.00015778
ILMN_1795400	TBCD	17	3.66052e+07	0.484	0.29 - 0.63	0.35 - 0.59	0.00015778
ILMN_1745282	RAGE	14	1.02695e+08	0.477	0.29 - 0.63	0.34 - 0.63	0.000158597
ILMN_1740633	PRF1	10	7.23574e+07	0.504	0.31 - 0.65	0.38 - 0.63	0.000158706
ILMN_1727389	CDC16	13	3.58471e+07	0.455	0.27 - 0.60	0.32 - 0.59	0.000159635
ILMN_1685625	UCP2	11	7.3686e+07	0.474	0.29 - 0.62	0.34 - 0.61	0.000159635
ILMN_1708029	TMEM8B	9	1.15038e+08	0.508	0.31 - 0.66	0.38 - 0.63	0.000159635
ILMN_1733998	DHRS9	2	1.69953e+08	0.49	0.30 - 0.64	0.36 - 0.62	0.000162557
ILMN_1657129	SKAP2	7	2.67073e+07	0.453	0.27 - 0.60	0.31 - 0.59	0.000163342
ILMN_3235326	LOC388796	20	3.70495e+07	0.524	0.32 - 0.68	0.38 - 0.71	0.000167115
ILMN_1758658	FADD	11	1.50238e+08	0.431	0.26 - 0.57	0.28 - 0.58	0.000168479
ILMN_1658472	APH1A	1	7.00532e+07	0.455	0.27 - 0.60	0.31 - 0.68	0.000168479
ILMN_2176251	C20orf72	20	1.24482e+08	0.473	0.29 - 0.62	0.36 - 0.59	0.000169271
ILMN_2311166	ITGB5	3	1.79714e+07	0.514	0.31 - 0.67	0.35 - 0.67	0.000169271
ILMN_1747016	CEP55	10	9.00713e+07	0.461	0.28 - 0.61	0.32 - 0.58	0.00016955
ILMN_2374352	DBNDD1	16	9.52885e+07	0.505	0.31 - 0.65	0.34 - 0.64	0.00016955
ILMN_3243945	MZT1	13	7.32841e+07	0.473	0.29 - 0.62	0.34 - 0.58	0.000169832
ILMN_1803279	TMED5	1	9.36178e+07	0.479	0.29 - 0.63	0.35 - 0.61	0.000171461
ILMN_1719695	NFKBIZ	3	1.0158e+08	0.504	0.31 - 0.66	0.35 - 0.64	0.000171644
ILMN_1787691	CITED4	1	4.1327e+07	0.496	0.30 - 0.65	0.35 - 0.63	0.000172818
ILMN_1690454	C3orf54	3	4.98423e+07	0.452	0.27 - 0.60	0.33 - 0.58	0.000172855
ILMN_1654001	SMC6	2	1.78453e+07	0.486	0.29 - 0.64	0.33 - 0.64	0.000174803
ILMN_1797764	RPL22L1	3	1.70583e+08	0.466	0.28 - 0.61	0.32 - 0.60	0.000174832
ILMN_2384544	ADAM15	1	1.55035e+08	0.479	0.29 - 0.63	0.35 - 0.59	0.00017563
ILMN_1680774	LOC728392	17	5.91715e+07	0.446	0.27 - 0.59	0.33 - 0.57	0.000176274
ILMN_1742224	SLTM	15	5.40305e+06	0.471	0.28 - 0.62	0.33 - 0.61	0.000176274
ILMN_1718607	TSPAN4	11	867070	0.455	0.27 - 0.60	0.33 - 0.61	0.000176654
ILMN_1782741	CD300LB	17	7.25175e+07	0.499	0.30 - 0.65	0.35 - 0.64	0.000177102
ILMN_1694731	CLCN7	16	1.49538e+06	0.473	0.29 - 0.62	0.33 - 0.62	0.000178756
ILMN_1790978	ATG7	3	1.15965e+07	0.505	0.31 - 0.66	0.36 - 0.63	0.000179191
ILMN_1790689	CRISPLD2	16	8.49428e+07	0.546	0.33 - 0.70	0.38 - 0.71	0.000179387
ILMN_1750511	NT5C3L	17	3.99816e+07	0.488	0.29 - 0.64	0.32 - 0.69	0.000180192
ILMN_1864900	MIAT	22	2.7072e+07	0.474	0.28 - 0.62	0.33 - 0.66	0.00018518
ILMN_1729868	SPRYD4	12	1.02442e+07	0.445	0.27 - 0.59	0.31 - 0.57	0.000186076
ILMN_1760201	DNMT1	19	5.68636e+07	0.484	0.29 - 0.63	0.35 - 0.59	0.000186076
ILMN_1738767	PLP2	X	4.90311e+07	0.467	0.28 - 0.62	0.31 - 0.61	0.000186891
ILMN_1756204	RPS6KA4	11	6.41395e+07	0.462	0.28 - 0.61	0.35 - 0.61	0.000187717
ILMN_1741096	FDFT1	8	1.16963e+07	0.45	0.27 - 0.60	0.33 - 0.57	0.000188948
ILMN_2393544	PRMT2	21	4.80843e+07	0.466	0.28 - 0.62	0.32 - 0.64	0.000189254
ILMN_1791840	RALBP1	18	9.538e+06	0.465	0.28 - 0.61	0.34 - 0.58	0.000190242
ILMN_3244457	EHBP1L1	11	1.25597e+08	0.458	0.28 - 0.60	0.34 - 0.55	0.000191045
ILMN_2379788	HIF1A	14	6.22147e+07	0.481	0.28 - 0.64	0.33 - 0.63	0.000191045
ILMN_1753745	HDDC2	6	6.536e+07	0.487	0.29 - 0.64	0.35 - 0.62	0.000191045
ILMN_2373632	IDH3B	20	2.64038e+06	0.467	0.28 - 0.62	0.32 - 0.67	0.000191711
ILMN_1749081	AUTS2	7	7.02578e+07	0.449	0.27 - 0.60	0.30 - 0.60	0.000192379
ILMN_2352131	ERBB2	17	3.78847e+07	0.464	0.28 - 0.61	0.32 - 0.60	0.000192409
ILMN_1803194	GALK1	17	7.37541e+07	0.456	0.28 - 0.60	0.32 - 0.61	0.000193605
ILMN_2148459	B2M	15	4.50101e+07	0.452	0.27 - 0.60	0.31 - 0.59	0.000195784
ILMN_2383489	CDK5RAP3	17	4.60589e+07	0.474	0.29 - 0.62	0.36 - 0.58	0.000198949
ILMN_1660732	PPP2R2B	5	1.45969e+08	0.494	0.30 - 0.64	0.36 - 0.64	0.000199145
ILMN_3274596	EIF4A2	3	1.86508e+08	0.467	0.28 - 0.62	0.31 - 0.63	0.000200074
ILMN_1767253	RRP12	10	9.91167e+07	0.484	0.29 - 0.64	0.34 - 0.60	0.000206062
ILMN_3307926	ADRBK1	11	6.70539e+07	0.469	0.28 - 0.62	0.32 - 0.61	0.000206319
ILMN_1791530	CPA5	7	130007819	0.46	0.27 - 0.61	0.28 - 0.60	0.000207118
ILMN_1718808	AKAP10	17	1.98091e+07	0.47	0.28 - 0.62	0.33 - 0.62	0.000207126
ILMN_1794707	ATHL1	11	295302	0.478	0.29 - 0.63	0.33 - 0.63	0.00020845
ILMN_1676611	PHPT1	9	1.39745e+08	0.47	0.28 - 0.62	0.34 - 0.60	0.000209799
ILMN_3244065	C9orf69	9	2.04966e+06	0.449	0.27 - 0.60	0.30 - 0.64	0.000210693
ILMN_1814122	MDC1	6	1.39007e+08	0.453	0.27 - 0.60	0.31 - 0.59	0.000210693
ILMN_2411658	HPS1	10	100190351	0.45	0.27 - 0.60	0.33 - 0.58	0.000210862
ILMN_1762312	FOXRED1	11	1.26148e+08	0.466	0.28 - 0.61	0.35 - 0.59	0.000211721
ILMN_1666364	COQ10A	12	541710	0.441	0.26 - 0.59	0.34 - 0.55	0.000212961
ILMN_1713006	CDC34	19	5.66645e+07	0.476	0.28 - 0.63	0.34 - 0.59	0.000212961
ILMN_1756928	RTN1	14	6.00631e+07	0.471	0.28 - 0.62	0.31 - 0.61	0.000213966
ILMN_1739942	FAM117B	2	2.03634e+08	0.498	0.30 - 0.65	0.36 - 0.64	0.000214721
ILMN_1690939	TYMP	22	5.0965e+07	0.452	0.27 - 0.60	0.33 - 0.60	0.000215071
ILMN_1780057	RENBP	X	1.9441e+08	0.484	0.29 - 0.63	0.33 - 0.61	0.000217622
ILMN_1706015	FAM43A	3	1.53201e+08	0.486	0.29 - 0.64	0.37 - 0.64	0.000217622
ILMN_1716056	LMF2	22	5.09416e+07	0.444	0.27 - 0.59	0.33 - 0.55	0.000217931
ILMN_1762284	ASPRV1	2	7.01874e+07	0.471	0.28 - 0.62	0.32 - 0.60	0.000217992
ILMN_1787526	C2orf88	2	1.91065e+08	0.487	0.29 - 0.64	0.35 - 0.61	0.000218558
ILMN_1784661	TMEM2	9	7.42987e+07	0.433	0.26 - 0.58	0.31 - 0.56	0.000218878
ILMN_1697448	TXNIP	1	1.45442e+08	0.426	0.25 - 0.57	0.30 - 0.56	0.000219532
ILMN_1698605	TMEM43	3	1.41848e+07	0.467	0.28 - 0.62	0.34 - 0.60	0.000219856
ILMN_2395375	GABBR1	6	873892	0.44	0.26 - 0.59	0.33 - 0.56	0.000220414
ILMN_1694810	PANX2	22	5.06187e+07	0.509	0.31 - 0.66	0.34 - 0.67	0.000221143
ILMN_1762281	DCTN3	9	8.36722e+06	0.436	0.26 - 0.58	0.30 - 0.56	0.00022153
ILMN_2368576	UBA52	19	1.45649e+08	0.46	0.27 - 0.61	0.32 - 0.60	0.00022153
ILMN_1790797	VPS28	8	1.86882e+07	0.464	0.28 - 0.61	0.32 - 0.59	0.00022153
ILMN_2115633	CD320	19	3.46138e+07	0.502	0.30 - 0.65	0.34 - 0.64	0.00022153
ILMN_1697491	PRR5L	11	3.64866e+07	0.49	0.30 - 0.64	0.36 - 0.62	0.000221664
ILMN_1801118	SNRNP25	16	107198	0.453	0.27 - 0.60	0.34 - 0.57	0.000221833
ILMN_1735275	WDSUB1	2	1.60093e+08	0.446	0.27 - 0.59	0.31 - 0.57	0.000223106
ILMN_1832208	TMEM33	4	1.33639e+07	0.479	0.29 - 0.63	0.35 - 0.60	0.000224017
ILMN_2384181	DHRS9	2	1.69952e+08	0.481	0.29 - 0.63	0.35 - 0.62	0.000224017
ILMN_1778240	GFOD1	6	4.19623e+07	0.504	0.30 - 0.66	0.34 - 0.65	0.000224017
ILMN_1777982	USF1	1	1.61009e+08	0.484	0.29 - 0.64	0.33 - 0.65	0.000224353
ILMN_1813455	SP110	2	2.31036e+08	0.464	0.28 - 0.61	0.32 - 0.63	0.000224679
ILMN_1810953	FLJ39739	1	1.43744e+08	0.445	0.26 - 0.60	0.30 - 0.58	0.000226369
ILMN_1690420	GFI1	1	9.29407e+07	0.462	0.28 - 0.61	0.34 - 0.57	0.00022665
ILMN_1685978	ATPIF1	1	2.85642e+07	0.459	0.27 - 0.61	0.33 - 0.58	0.000226984
ILMN_1753782	ZNF266	19	9.52338e+06	0.452	0.27 - 0.60	0.32 - 0.63	0.000227086
ILMN_2154671	COX6B1	19	3.61393e+07	0.445	0.26 - 0.59	0.32 - 0.58	0.000228035
ILMN_2227011	ACSBG1	15	1.36208e+08	0.438	0.26 - 0.58	0.31 - 0.55	0.000229244
ILMN_1697218	MED22	9	7.84634e+07	0.451	0.27 - 0.60	0.29 - 0.60	0.000229244
ILMN_1684306	S100A4	1	1.53517e+08	0.441	0.26 - 0.59	0.30 - 0.57	0.000230925
ILMN_1711223	LOC100505702	4	7.96025e+07	0.439	0.26 - 0.58	0.31 - 0.56	0.000231253
ILMN_1678781	ARHGAP33	19	3.62797e+07	0.461	0.27 - 0.61	0.30 - 0.59	0.000231504
ILMN_2222074	PTPN12	7	7.72691e+07	0.477	0.28 - 0.63	0.34 - 0.63	0.000235334
ILMN_2346460	NARG2	15	6.07139e+07	0.434	0.26 - 0.58	0.30 - 0.56	0.000235713
ILMN_1758311	NET1	10	5.50005e+06	0.501	0.30 - 0.65	0.38 - 0.64	0.000236619
ILMN_1711606	PRDX5	11	64088524	0.459	0.27 - 0.61	0.35 - 0.59	0.000236691
ILMN_1773117	BCOR	X	6.65124e+06	0.433	0.25 - 0.58	0.31 - 0.57	0.000239036
ILMN_1692785	KLHL21	1	3.9911e+07	0.48	0.29 - 0.63	0.32 - 0.62	0.000239036
ILMN_1735552	KIF1B	1	1.04416e+07	0.436	0.26 - 0.58	0.29 - 0.65	0.000241492
ILMN_2403664	POMC	2	2.53841e+07	0.475	0.28 - 0.63	0.32 - 0.63	0.000242607
ILMN_1902658	LOC92249	X	6.26468e+07	0.458	0.27 - 0.61	0.29 - 0.60	0.000244459
ILMN_1791896	EBAG9	8	1.10577e+08	0.467	0.28 - 0.62	0.34 - 0.59	0.000244668
ILMN_1694432	CRIP2	14	1.05946e+08	0.49	0.29 - 0.64	0.34 - 0.62	0.000245124
ILMN_1731736	RIN3	14	9.3155e+07	0.475	0.28 - 0.63	0.33 - 0.60	0.000245453
ILMN_1692539	SH3BP1	22	3.80518e+07	0.448	0.27 - 0.60	0.31 - 0.60	0.000247391
ILMN_1800354	CST3	20	2.36146e+07	0.486	0.29 - 0.64	0.35 - 0.61	0.000247812
ILMN_1713505	NPC1	18	2.11119e+07	0.468	0.28 - 0.62	0.34 - 0.59	0.00024808
ILMN_1807044	UBAC1	9	1.38825e+08	0.466	0.28 - 0.62	0.30 - 0.63	0.00025188
ILMN_1705464	MRPL41	9	1.40447e+08	0.466	0.27 - 0.62	0.33 - 0.60	0.000254006
ILMN_1752728	FUCA1	1	2.41718e+07	0.468	0.28 - 0.62	0.33 - 0.59	0.000254109
ILMN_2327860	MAL	2	9.57197e+07	0.453	0.27 - 0.60	0.32 - 0.60	0.000254617
ILMN_1764871	PIGP	21	3.84396e+07	0.476	0.28 - 0.63	0.34 - 0.60	0.000254977
ILMN_1697220	NT5E	6	8.6205e+07	0.462	0.27 - 0.61	0.30 - 0.59	0.000255012
ILMN_1730867	AZU1	19	8.24253e+06	0.457	0.27 - 0.61	0.32 - 0.58	0.000255891
ILMN_1756595	SH3TC1	4	830882	0.468	0.28 - 0.62	0.31 - 0.60	0.000255891
ILMN_1668526	GVIN1	11	6.73491e+06	0.422	0.25 - 0.57	0.28 - 0.54	0.000256619
ILMN_1652787	PIK3AP1	10	9.83533e+07	0.434	0.25 - 0.58	0.32 - 0.53	0.000257456
ILMN_1733377	UBOX5	20	3.12752e+06	0.463	0.27 - 0.61	0.35 - 0.60	0.000261448
ILMN_1658486	MRPL54	19	1.08682e+08	0.45	0.26 - 0.60	0.31 - 0.62	0.000262139
ILMN_1913060	CMKLR1	12	3.76531e+06	0.494	0.29 - 0.65	0.35 - 0.64	0.000262139
ILMN_1657790	SRSF11	1	7.07174e+07	0.454	0.27 - 0.61	0.31 - 0.58	0.000262662
ILMN_1856480	AK055323	3	1.60797e+08	0.476	0.28 - 0.63	0.32 - 0.66	0.000262898
ILMN_1682717	IER3	6	7.67488e+06	0.458	0.27 - 0.61	0.33 - 0.58	0.00026375
ILMN_1675656	PPFIBP2	11	3.07112e+07	0.491	0.29 - 0.65	0.30 - 0.67	0.00026375
ILMN_1723467	ITGB1	10	3.10006e+07	0.456	0.27 - 0.61	0.31 - 0.61	0.0002652
ILMN_3234081	STX1B	16	3.31895e+07	0.475	0.28 - 0.63	0.34 - 0.59	0.0002652
ILMN_1761281	MT2A	4	69241984	0.506	0.30 - 0.66	0.33 - 0.66	0.000265854
ILMN_1759117	XK	X	3.75909e+07	0.484	0.29 - 0.64	0.33 - 0.61	0.000266128
ILMN_2406335	ANKRD17	4	7.3941e+07	0.443	0.26 - 0.59	0.31 - 0.56	0.000266501
ILMN_1741613	SERINC1	6	3.97856e+07	0.446	0.26 - 0.60	0.31 - 0.59	0.00026963
ILMN_1656310	IDO1	8	1.22765e+08	0.452	0.27 - 0.60	0.33 - 0.57	0.00026963
ILMN_1677318	MARCH8	10	1.71089e+07	0.449	0.26 - 0.60	0.29 - 0.60	0.000271175
ILMN_1670302	HK3	5	4.77881e+07	0.461	0.27 - 0.61	0.32 - 0.60	0.000271175
ILMN_1745533	FAM117A	17	1.76308e+08	0.468	0.28 - 0.62	0.34 - 0.58	0.000271175
ILMN_3251440	PIK3C2A	11	4.59534e+07	0.488	0.29 - 0.64	0.33 - 0.62	0.000271175
ILMN_2382500	MS4A14	11	6.01843e+07	0.446	0.26 - 0.60	0.30 - 0.60	0.000271245
ILMN_1784467	NUP210	3	1.33581e+07	0.473	0.28 - 0.62	0.33 - 0.62	0.000272115
ILMN_1821127	CK905457	15	8.10526e+07	0.429	0.25 - 0.57	0.31 - 0.55	0.000272785
ILMN_1688775	METRNL	17	5.93924e+07	0.514	0.31 - 0.67	0.35 - 0.66	0.000272785
ILMN_2310909	ATP2A3	17	3.82768e+06	0.476	0.28 - 0.63	0.33 - 0.62	0.000273192
ILMN_2339863	VPS28	8	1.45696e+08	0.456	0.27 - 0.61	0.30 - 0.60	0.000273971
ILMN_1757361	NCF4	22	3.7272e+07	0.478	0.29 - 0.63	0.35 - 0.60	0.000273971
ILMN_1742001	CD160	1	1.4565e+08	0.495	0.29 - 0.65	0.34 - 0.69	0.000273971
ILMN_2168217	GPR183	13	9.99472e+07	0.5	0.29 - 0.66	0.35 - 0.66	0.000276673
ILMN_1722622	CD163	12	7635567	0.466	0.28 - 0.62	0.35 - 0.57	0.00027794
ILMN_1813950	SCGB1C1	11	193888	0.486	0.29 - 0.64	0.32 - 0.65	0.000279932
ILMN_1721657	RSU1	10	1.66328e+07	0.422	0.25 - 0.57	0.28 - 0.59	0.000281123
ILMN_1797776	PRSS23	11	8.65222e+07	0.461	0.27 - 0.61	0.34 - 0.58	0.000282321
ILMN_2386891	GLT8D1	3	997408	0.44	0.26 - 0.59	0.30 - 0.57	0.000283221
ILMN_1703041	IDUA	4	5.27289e+07	0.455	0.27 - 0.61	0.32 - 0.61	0.000283221
ILMN_1816244	LOC151162	2	3.80745e+07	0.466	0.27 - 0.62	0.33 - 0.59	0.000285797
ILMN_1723978	LGALS1	22	1.35212e+08	0.475	0.28 - 0.63	0.32 - 0.62	0.000285797
ILMN_2101025	ZNF75D	X	450502	0.435	0.25 - 0.58	0.30 - 0.59	0.000286357
ILMN_2415536	SIPA1	11	7.05148e+07	0.447	0.26 - 0.60	0.33 - 0.57	0.000286357
ILMN_1657810	PPM1M	3	5.22846e+07	0.456	0.27 - 0.61	0.31 - 0.60	0.000286357
ILMN_1703683	COG4	16	65417929	0.472	0.28 - 0.62	0.33 - 0.63	0.000286357
ILMN_1800634	NME4	16	1.3442e+08	0.485	0.29 - 0.64	0.35 - 0.60	0.000286357
ILMN_1729208	NGFRAP1	X	1.02633e+08	0.495	0.29 - 0.65	0.33 - 0.65	0.00028656
ILMN_1778523	KLF9	9	2.38486e+07	0.463	0.27 - 0.62	0.32 - 0.63	0.000286784
ILMN_3240586	PLD6	17	1.71044e+07	0.464	0.28 - 0.61	0.31 - 0.59	0.000286784
ILMN_1775373	CMTM5	14	7.29999e+07	0.487	0.29 - 0.64	0.33 - 0.63	0.000286784
ILMN_1746968	PHF1	6	3.33839e+07	0.445	0.26 - 0.60	0.30 - 0.57	0.000287124
ILMN_1726565	PIK3R2	19	1.82812e+07	0.465	0.27 - 0.62	0.32 - 0.62	0.000287841
ILMN_1724700	RIOK3	18	2.10626e+07	0.482	0.29 - 0.64	0.34 - 0.61	0.000288216
ILMN_1705297	MYBPH	1	2.03137e+08	0.489	0.29 - 0.64	0.32 - 0.65	0.000289516
ILMN_2149935	CC2D1B	1	5.28164e+07	0.463	0.27 - 0.62	0.34 - 0.62	0.000291902
ILMN_1665761	BCL11B	14	9.96361e+07	0.48	0.28 - 0.63	0.34 - 0.63	0.000291972
ILMN_1769250	ARFGAP2	11	1.9546e+08	0.436	0.25 - 0.59	0.32 - 0.56	0.000292951
ILMN_1653278	MUC20	3	4.7186e+07	0.461	0.27 - 0.61	0.35 - 0.57	0.000292951
ILMN_1710734	GZMK	5	5.43296e+07	0.471	0.27 - 0.63	0.33 - 0.61	0.000293687
ILMN_3243112	RNF182	6	1.61578e+08	0.466	0.27 - 0.62	0.32 - 0.62	0.00029424
ILMN_1806165	HSPA7	1	1.39797e+07	0.473	0.28 - 0.63	0.30 - 0.61	0.00029424
ILMN_1666632	VPS52	6	4.66216e+06	0.462	0.27 - 0.61	0.32 - 0.61	0.00029557
ILMN_1731048	TLR1	4	3.8798e+07	0.442	0.26 - 0.59	0.33 - 0.57	0.00029727
ILMN_3235718	LOC91316	22	2.40021e+07	0.459	0.27 - 0.61	0.31 - 0.61	0.000298541
ILMN_1701434	RAP1B	12	6.90543e+07	0.459	0.27 - 0.61	0.32 - 0.60	0.00029874
ILMN_1669788	NUDT14	14	1.05639e+08	0.46	0.27 - 0.61	0.31 - 0.59	0.000299032
ILMN_1672605	C7orf41	7	3.02023e+07	0.492	0.29 - 0.65	0.33 - 0.63	0.000300562
ILMN_1657797	FIBP	11	1.50449e+08	0.415	0.24 - 0.56	0.29 - 0.57	0.000300638
ILMN_3299520	PRKCB	16	2.42315e+07	0.456	0.27 - 0.61	0.33 - 0.59	0.000300638
ILMN_3238889	RPRD2	1	6.56514e+07	0.463	0.27 - 0.62	0.30 - 0.61	0.000300638
ILMN_2357419	LILRA5	19	5.48227e+07	0.455	0.27 - 0.61	0.34 - 0.56	0.000302521
ILMN_1762990	KIAA0141	5	1.41319e+08	0.463	0.27 - 0.61	0.32 - 0.61	0.000303552
ILMN_1746579	UBE2O	17	7.43861e+07	0.441	0.26 - 0.59	0.29 - 0.60	0.000304031
ILMN_2410742	JMJD1C	10	6.49361e+07	0.452	0.27 - 0.60	0.32 - 0.58	0.000304926
ILMN_1867361	AI610323	1	2.25961e+08	0.448	0.26 - 0.60	0.34 - 0.56	0.000304969
ILMN_1694711	MAD2L1BP	6	1.06558e+08	0.445	0.26 - 0.59	0.32 - 0.56	0.000305767
ILMN_1655077	PRDM1	6	4.36083e+07	0.475	0.28 - 0.63	0.32 - 0.62	0.000305767
ILMN_1808202	C19orf22	19	896636	0.425	0.25 - 0.57	0.29 - 0.54	0.000305785
ILMN_1783156	MAP2K3	17	8.16048e+07	0.45	0.26 - 0.60	0.32 - 0.57	0.000308551
ILMN_1813572	IL16	15	2.12185e+07	0.484	0.29 - 0.64	0.33 - 0.62	0.000308551
ILMN_1794677	TMC6	17	7.61091e+07	0.45	0.27 - 0.60	0.33 - 0.60	0.000309493
ILMN_1729453	TSPAN9	12	3.39564e+06	0.493	0.29 - 0.65	0.32 - 0.64	0.000310043
ILMN_1780058	DEGS1	1	1.56682e+08	0.467	0.27 - 0.62	0.33 - 0.62	0.000311852
ILMN_2076640	KHDRBS1	1	3.87806e+07	0.469	0.28 - 0.62	0.35 - 0.59	0.000311852
ILMN_1714393	RAB24	5	1.76728e+08	0.475	0.28 - 0.63	0.34 - 0.60	0.000311852
ILMN_1768958	RASGRP1	15	3.25092e+07	0.486	0.28 - 0.64	0.35 - 0.62	0.000311852
ILMN_1699160	ITK	5	2.24381e+08	0.489	0.29 - 0.65	0.36 - 0.63	0.000311852
ILMN_1654566	HSPA1L	6	4.07988e+06	0.462	0.27 - 0.61	0.30 - 0.63	0.000313182
ILMN_1759250	TAP2	6	3.28726e+06	0.474	0.28 - 0.63	0.34 - 0.64	0.000313182
ILMN_1804798	BEX4	X	1.02472e+08	0.474	0.28 - 0.63	0.34 - 0.62	0.000314606
ILMN_1747251	LTB4R	14	2.47859e+07	0.505	0.30 - 0.66	0.38 - 0.62	0.000316057
ILMN_1807972	MICAL1	6	1.09765e+08	0.462	0.27 - 0.61	0.33 - 0.60	0.000317516
ILMN_1812666	DNAJC15	13	4.36833e+07	0.466	0.28 - 0.62	0.33 - 0.62	0.000318762
ILMN_1760509	EOMES	3	2.7758e+07	0.449	0.26 - 0.60	0.32 - 0.60	0.000318813
ILMN_1788203	HEY1	8	1.11442e+08	0.446	0.26 - 0.60	0.30 - 0.59	0.000319027
ILMN_1747627	ABCA2	9	1.39902e+08	0.462	0.27 - 0.62	0.33 - 0.59	0.000319027
ILMN_1662843	CD53	1	8.06764e+07	0.502	0.29 - 0.66	0.36 - 0.63	0.000319027
ILMN_1761797	CSTB	21	4.51946e+07	0.435	0.25 - 0.58	0.29 - 0.61	0.000322856
ILMN_1786021	PRKAB2	1	1.46627e+08	0.433	0.25 - 0.58	0.32 - 0.56	0.000324307
ILMN_2077504	LTN1	21	3.03009e+07	0.434	0.25 - 0.58	0.31 - 0.56	0.000327594
ILMN_1721888	ITGA2B	17	4.24521e+07	0.488	0.28 - 0.65	0.33 - 0.61	0.000329673
ILMN_1823231	CR603183	8	6.00333e+07	0.445	0.26 - 0.59	0.34 - 0.54	0.000329958
ILMN_1733270	CD163	12	1.05354e+08	0.426	0.25 - 0.57	0.30 - 0.54	0.000331508
ILMN_1666512	SKIV2L	6	45480677	0.445	0.26 - 0.59	0.33 - 0.57	0.000331508
ILMN_1740742	UROD	1	3.44718e+06	0.454	0.27 - 0.60	0.34 - 0.58	0.000331508
ILMN_1743103	SH3PXD2A	10	7.63256e+06	0.479	0.28 - 0.64	0.34 - 0.61	0.000331508
ILMN_1764764	MUM1	19	1.37828e+06	0.467	0.27 - 0.62	0.34 - 0.59	0.000332427
ILMN_1766165	SNCA	4	9.06504e+07	0.469	0.27 - 0.62	0.33 - 0.59	0.000332652
ILMN_1798947	ANKRD55	5	3.07684e+07	0.441	0.26 - 0.59	0.32 - 0.57	0.00033362
ILMN_1669607	PHKG2	16	5.53961e+07	0.444	0.26 - 0.59	0.31 - 0.56	0.00033362
ILMN_3231638	FAM160B1	10	1.16624e+08	0.456	0.27 - 0.61	0.31 - 0.61	0.000334087
ILMN_1788213	FRAT2	10	9.90925e+07	0.461	0.27 - 0.61	0.33 - 0.61	0.000334933
ILMN_1801101	ZBTB48	1	6.64931e+06	0.449	0.26 - 0.60	0.30 - 0.58	0.000334988
ILMN_1669878	GUSB	7	6.54259e+07	0.459	0.27 - 0.61	0.35 - 0.58	0.000336952
ILMN_2066756	NCAPG2	7	1.58444e+08	0.438	0.25 - 0.59	0.28 - 0.58	0.000337074
ILMN_1672503	DPYSL2	8	1.01707e+08	0.435	0.25 - 0.58	0.30 - 0.59	0.000341201
ILMN_3235853	S1PR1	1	2.65153e+07	0.487	0.28 - 0.64	0.35 - 0.61	0.000341201
ILMN_1674926	C19orf35	19	2.27499e+06	0.442	0.26 - 0.59	0.31 - 0.59	0.000344119
ILMN_1783149	CDH23	10	7.35755e+07	0.459	0.27 - 0.61	0.33 - 0.59	0.000349121
ILMN_1779214	ATM	11	1.08239e+08	0.455	0.26 - 0.61	0.33 - 0.57	0.000350696
ILMN_1698777	ADCK1	14	7.5476e+07	0.432	0.25 - 0.58	0.28 - 0.55	0.000352105
ILMN_2415529	CDK5RAP2	9	3.96735e+07	0.446	0.26 - 0.60	0.33 - 0.56	0.000352105
ILMN_1675756	KCNJ15	21	1.23165e+08	0.478	0.28 - 0.63	0.32 - 0.61	0.000352105
ILMN_1713380	EIF2B2	14	7.84e+07	0.5	0.30 - 0.66	0.36 - 0.63	0.000352105
ILMN_1854765	AK130706	5	15141302	0.437	0.25 - 0.59	0.27 - 0.57	0.000352559
ILMN_1801864	NTAN1	16	1.47031e+07	0.481	0.28 - 0.64	0.31 - 0.64	0.000352559
ILMN_1730620	ARRB1	11	4.11395e+06	0.448	0.26 - 0.60	0.32 - 0.59	0.000354328
ILMN_2064694	STIM1	11	7.49767e+07	0.452	0.26 - 0.60	0.31 - 0.60	0.000354328
ILMN_1747347	C17orf60	X	71034928	0.459	0.27 - 0.61	0.31 - 0.64	0.000354415
ILMN_1789535	DHDDS	1	2.67975e+07	0.433	0.25 - 0.58	0.28 - 0.58	0.000355008
ILMN_1683660	EIF3H	8	1.17659e+08	0.452	0.26 - 0.60	0.32 - 0.59	0.000357233
ILMN_2131523	SACS	13	2.39033e+07	0.473	0.27 - 0.63	0.32 - 0.63	0.000358078
ILMN_1717052	STARD10	11	7.24668e+07	0.471	0.27 - 0.63	0.33 - 0.59	0.000359298
ILMN_1780334	KCNJ2	17	6.8176e+07	0.435	0.25 - 0.59	0.27 - 0.58	0.000360665
ILMN_1803772	POLD4	11	6.71193e+07	0.452	0.26 - 0.61	0.32 - 0.58	0.000361205
ILMN_1738449	STIM2	4	2.70267e+07	0.471	0.27 - 0.63	0.34 - 0.58	0.000361693
ILMN_1738251	DRD3	3	1.1385e+08	0.413	0.24 - 0.56	0.28 - 0.57	0.000366464
ILMN_2049536	TRPV2	17	1.63401e+07	0.473	0.28 - 0.63	0.32 - 0.60	0.000368896
ILMN_1699989	BNIPL	1	6.65319e+07	0.431	0.25 - 0.58	0.29 - 0.60	0.000369061
ILMN_1664750	TMBIM4	12	1.5102e+08	0.436	0.25 - 0.59	0.30 - 0.60	0.000369061
ILMN_1703754	CEP192	18	1.31247e+07	0.424	0.24 - 0.57	0.32 - 0.54	0.00037001
ILMN_1737992	CRAT	9	4.68517e+07	0.438	0.25 - 0.59	0.33 - 0.56	0.000370694
ILMN_1813256	CRIPT	2	1.31857e+08	0.456	0.27 - 0.61	0.32 - 0.58	0.000370694
ILMN_1810628	PRUNE2	9	7.92266e+07	0.426	0.24 - 0.58	0.31 - 0.54	0.000371833
ILMN_2334587	HNRNPC	14	5.52161e+07	0.443	0.25 - 0.60	0.29 - 0.59	0.000376283
ILMN_1846922	BC042566	10	1.34144e+08	0.443	0.26 - 0.60	0.32 - 0.58	0.000376283
ILMN_2364305	FECH	18	2.16774e+07	0.472	0.27 - 0.63	0.32 - 0.59	0.000376283
ILMN_1769779	PTP4A3	8	1.42441e+08	0.439	0.25 - 0.59	0.28 - 0.60	0.00037705
ILMN_1657398	LOC284757	20	5.88995e+07	0.455	0.26 - 0.61	0.28 - 0.61	0.000378023
ILMN_3178302	FNDC3B	3	1.72118e+08	0.429	0.25 - 0.58	0.30 - 0.55	0.000380372
ILMN_1694479	WDR18	19	994480	0.438	0.25 - 0.59	0.28 - 0.59	0.000381228
ILMN_2386982	PRKCZ	1	2.11677e+06	0.459	0.27 - 0.61	0.32 - 0.60	0.000384461
ILMN_1683950	SNX11	17	4.62e+07	0.471	0.27 - 0.63	0.32 - 0.60	0.000386022
ILMN_1696974	ANG	14	2.11617e+07	0.443	0.25 - 0.60	0.29 - 0.59	0.000386592
ILMN_1718771	CCDC24	1	4.44621e+07	0.449	0.26 - 0.60	0.32 - 0.56	0.000389106
ILMN_1693494	CMTM1	16	6.6613e+07	0.45	0.26 - 0.60	0.29 - 0.61	0.000391882
ILMN_1671337	SLC2A5	1	9.09738e+06	0.46	0.27 - 0.62	0.31 - 0.58	0.000396304
ILMN_1746012	MBD6	12	9.49064e+07	0.451	0.26 - 0.60	0.33 - 0.57	0.000397382
ILMN_1694027	SESN3	11	5.79237e+07	0.464	0.27 - 0.62	0.31 - 0.60	0.000397382
ILMN_1731699	RAB15	14	6.54129e+07	0.434	0.25 - 0.58	0.28 - 0.57	0.000398641
ILMN_1742025	OLFM1	9	1.38013e+08	0.471	0.27 - 0.63	0.31 - 0.63	0.00040159
ILMN_3181538	C10orf105	10	7.34716e+07	0.447	0.26 - 0.60	0.33 - 0.56	0.000402477
ILMN_1767992	SLC12A6	15	3.45259e+07	0.441	0.25 - 0.59	0.29 - 0.61	0.000403019
ILMN_1882112	BX101252	14	2.12185e+07	0.423	0.24 - 0.57	0.30 - 0.54	0.00040363
ILMN_2390853	CTSH	15	2.77074e+06	0.441	0.25 - 0.60	0.29 - 0.56	0.00040363
ILMN_1692191	GNA12	7	7.92143e+07	0.443	0.25 - 0.60	0.29 - 0.59	0.00040363
ILMN_1790534	MAP2K3	17	7.13736e+07	0.452	0.26 - 0.61	0.32 - 0.58	0.00040363
ILMN_1798706	GPR183	13	9.99474e+07	0.46	0.27 - 0.62	0.34 - 0.59	0.000404151
ILMN_1736796	RB1CC1	8	5.35357e+07	0.443	0.25 - 0.60	0.29 - 0.62	0.000407052
ILMN_1724480	AXIN2	17	6.35249e+07	0.449	0.26 - 0.60	0.31 - 0.60	0.000410313
ILMN_1701195	PLA2G7	6	46677065	0.495	0.29 - 0.65	0.34 - 0.62	0.000414879
ILMN_1730928	CDK5R1	17	2.33041e+07	0.441	0.25 - 0.60	0.32 - 0.56	0.000415759
ILMN_1682120	THEM4	1	1.58585e+08	0.45	0.26 - 0.60	0.34 - 0.56	0.000415759
ILMN_1710906	RNF145	5	1.51846e+08	0.45	0.26 - 0.60	0.30 - 0.58	0.000415759
ILMN_2311041	MRPL52	14	3.08176e+07	0.482	0.28 - 0.64	0.35 - 0.62	0.000415759
ILMN_1763609	SLC22A16	6	1.10746e+08	0.495	0.29 - 0.65	0.30 - 0.68	0.000416974
ILMN_1760708	CRYBB2P1	22	2.58533e+07	0.472	0.27 - 0.63	0.31 - 0.63	0.000419631
ILMN_1746846	TTLL4	2	2.19619e+08	0.467	0.27 - 0.62	0.33 - 0.58	0.000420842
ILMN_1733802	KAT2B	3	1.33091e+08	0.45	0.26 - 0.61	0.32 - 0.59	0.000424092
ILMN_1669831	C6orf192	6	2.01954e+07	0.469	0.27 - 0.63	0.34 - 0.60	0.000424092
ILMN_1763688	RNASEK-C17ORF49	17	4.04256e+07	0.442	0.25 - 0.60	0.32 - 0.56	0.000424316
ILMN_1668743	RILPL2	12	1.239e+08	0.456	0.26 - 0.61	0.31 - 0.61	0.000424316
ILMN_3224926	RBM47	4	6.92066e+06	0.477	0.27 - 0.64	0.34 - 0.61	0.000424316
ILMN_2339748	RNF13	3	1.49679e+08	0.464	0.27 - 0.62	0.35 - 0.60	0.000424915
ILMN_1896967	AK055485	5	1.00241e+08	0.465	0.27 - 0.62	0.33 - 0.60	0.000425604
ILMN_1716979	GSTM4	1	40214753	0.44	0.25 - 0.59	0.29 - 0.58	0.000426419
ILMN_2348503	PPIE	1	1.10199e+08	0.479	0.28 - 0.64	0.31 - 0.62	0.000426419
ILMN_1698406	ORMDL1	2	1.90636e+08	0.45	0.26 - 0.60	0.30 - 0.61	0.000432997
ILMN_1785107	NXT2	X	3.49671e+07	0.435	0.25 - 0.59	0.30 - 0.57	0.000435206
ILMN_1654915	MLLT4	6	168271169	0.442	0.25 - 0.60	0.31 - 0.60	0.000435206
ILMN_1719290	AK057604	21	1.08788e+08	0.443	0.26 - 0.59	0.31 - 0.58	0.000435206
ILMN_1757604	TPM2	9	6.08951e+07	0.434	0.25 - 0.58	0.31 - 0.56	0.000435267
ILMN_1753112	CD5	11	3.56845e+07	0.468	0.27 - 0.62	0.33 - 0.60	0.000435267
ILMN_2159322	SLK	10	1.05787e+08	0.428	0.24 - 0.58	0.29 - 0.57	0.000435555
ILMN_1814074	PHKA2	X	1.2135e+08	0.46	0.27 - 0.61	0.33 - 0.58	0.000436788
ILMN_1727402	HCLS1	3	1.8911e+07	0.469	0.27 - 0.62	0.32 - 0.62	0.000436788
ILMN_1695025	CD2	1	1.17312e+08	0.45	0.26 - 0.60	0.31 - 0.61	0.00043687
ILMN_1695530	MS4A3	11	5.98383e+07	0.447	0.26 - 0.60	0.30 - 0.59	0.000438295
ILMN_2153787	ARRDC5	19	1.44263e+08	0.44	0.25 - 0.60	0.30 - 0.57	0.000439072
ILMN_1815121	PLAGL1	6	4.89107e+06	0.449	0.26 - 0.60	0.31 - 0.58	0.000439072
ILMN_1770824	ARHGAP4	X	3.57439e+07	0.419	0.24 - 0.57	0.30 - 0.54	0.000443214
ILMN_2101034	CAPN12	19	3.92212e+07	0.45	0.26 - 0.61	0.30 - 0.59	0.000443214
ILMN_2082314	TOM1	22	1.53173e+08	0.492	0.29 - 0.65	0.35 - 0.63	0.000443214
ILMN_1657624	NSFL1C	20	1.42308e+06	0.494	0.29 - 0.65	0.33 - 0.66	0.000444352
ILMN_2215119	SYNJ2	6	1.58519e+08	0.448	0.26 - 0.60	0.30 - 0.59	0.000446219
ILMN_1674941	ANO6	12	1.9855e+06	0.432	0.25 - 0.59	0.29 - 0.56	0.000446938
ILMN_3238274	BTBD2	19	4.58256e+07	0.433	0.25 - 0.59	0.31 - 0.56	0.000446938
ILMN_1714444	KLF12	13	7.42608e+07	0.469	0.27 - 0.63	0.32 - 0.61	0.000446945
ILMN_1708340	DAPK1	9	9.03228e+07	0.438	0.25 - 0.59	0.29 - 0.58	0.000447581
ILMN_2186061	PFKFB3	10	6.27713e+06	0.45	0.25 - 0.61	0.29 - 0.59	0.000451295
ILMN_1658639	SLC46A3	13	2.92746e+07	0.434	0.25 - 0.58	0.31 - 0.56	0.000451478
ILMN_1765880	C16orf57	16	1.12021e+08	0.437	0.25 - 0.59	0.29 - 0.60	0.000451665
ILMN_1729487	GMPR	6	2.78706e+07	0.44	0.25 - 0.60	0.32 - 0.56	0.000451665
ILMN_1682727	JAZF1	7	1.62954e+07	0.461	0.27 - 0.61	0.32 - 0.61	0.000451665
ILMN_2249920	FYN	6	5.80554e+07	0.462	0.26 - 0.62	0.32 - 0.58	0.000451665
ILMN_1669122	MGC39372	6	2.85522e+06	0.448	0.26 - 0.60	0.32 - 0.57	0.000452199
ILMN_1712705	RAB40C	16	6.58981e+07	0.419	0.24 - 0.57	0.27 - 0.55	0.000452511
ILMN_1661537	LEPROT	1	679210	0.431	0.25 - 0.58	0.29 - 0.57	0.000452511
ILMN_1746917	INO80B-WBP1	2	7.46878e+07	0.43	0.24 - 0.58	0.30 - 0.55	0.000454566
ILMN_1751120	HIST1H4H	6	2.62854e+07	0.479	0.28 - 0.64	0.32 - 0.63	0.000459467
ILMN_1691432	PRDM4	12	5.03852e+07	0.427	0.24 - 0.58	0.28 - 0.57	0.000460926
ILMN_2081988	LANCL1	2	5.09622e+07	0.454	0.26 - 0.61	0.32 - 0.60	0.000460926
ILMN_1701621	TYMP	22	2.11296e+08	0.46	0.26 - 0.62	0.33 - 0.60	0.000460926
ILMN_2191568	NPRL2	3	1.08127e+08	0.472	0.27 - 0.63	0.33 - 0.68	0.000460926
ILMN_1767837	GOLT1B	12	151942	0.456	0.26 - 0.61	0.31 - 0.59	0.000461208
ILMN_1779572	PLEKHM1P	17	2.16706e+07	0.473	0.27 - 0.63	0.34 - 0.61	0.000461208
ILMN_1677827	TLR7	X	1.29083e+07	0.493	0.29 - 0.65	0.35 - 0.63	0.000461278
ILMN_2231189	HIAT1	1	1.00549e+08	0.418	0.24 - 0.57	0.28 - 0.54	0.000465964
ILMN_1732831	CHST7	X	4.64577e+07	0.459	0.26 - 0.61	0.31 - 0.57	0.000468427
ILMN_1778143	GRAP2	22	8.75724e+07	0.436	0.25 - 0.59	0.30 - 0.59	0.000468936
ILMN_1659627	BP418551	2	4.03671e+07	0.451	0.26 - 0.60	0.31 - 0.60	0.000468936
ILMN_3236220	LPAR2	19	1.97347e+07	0.469	0.27 - 0.62	0.34 - 0.60	0.000470857
ILMN_1705686	NRGN	11	1.24617e+08	0.46	0.26 - 0.62	0.30 - 0.59	0.000474085
ILMN_1752591	LEPROTL1	8	2.99654e+07	0.473	0.27 - 0.63	0.34 - 0.60	0.000475131
ILMN_1776998	DNAJA4	15	7.85742e+07	0.463	0.26 - 0.62	0.32 - 0.60	0.000477293
ILMN_1693401	KLHL28	14	4.53983e+07	0.422	0.24 - 0.57	0.30 - 0.56	0.000477443
ILMN_1654118	BCL2L1	20	3.02525e+07	0.433	0.25 - 0.59	0.29 - 0.55	0.000479734
ILMN_1916256	TCRA	14	22971266	0.45	0.25 - 0.61	0.30 - 0.59	0.000483548
ILMN_2415157	ARID5A	2	9.7218e+07	0.433	0.25 - 0.59	0.30 - 0.56	0.000484314
ILMN_1698307	DBNL	7	4.41013e+07	0.449	0.26 - 0.60	0.31 - 0.58	0.000485473
ILMN_2343097	NCALD	8	1.02699e+08	0.447	0.26 - 0.60	0.31 - 0.60	0.000486053
ILMN_1683093	GYPB	4	1.44922e+08	0.465	0.27 - 0.62	0.33 - 0.59	0.000490554
ILMN_2198239	HGD	3	1.20347e+08	0.46	0.26 - 0.62	0.33 - 0.59	0.000492091
ILMN_1695991	COLQ	3	1.54917e+07	0.439	0.25 - 0.59	0.32 - 0.59	0.00049214
ILMN_1737184	CDCA7	2	1.74233e+08	0.441	0.25 - 0.60	0.32 - 0.55	0.000493354
ILMN_1758938	SLC31A2	9	1.15926e+08	0.458	0.26 - 0.62	0.31 - 0.62	0.000496388
ILMN_2225144	EIF4E3	3	7.17323e+07	0.431	0.24 - 0.58	0.30 - 0.56	0.000500624
ILMN_1718303	PVRL2	19	4.53819e+07	0.475	0.27 - 0.63	0.29 - 0.63	0.000501564
ILMN_1687351	ANKRA2	5	7.28534e+07	0.421	0.24 - 0.57	0.27 - 0.57	0.000504497
ILMN_1654692	RALGPS2	1	9.03461e+07	0.44	0.25 - 0.59	0.32 - 0.56	0.000505052
ILMN_1689371	GIMAP2	7	1.5039e+08	0.44	0.25 - 0.60	0.32 - 0.56	0.000505052
ILMN_1812995	CTSL1	9	1.78849e+08	0.448	0.25 - 0.60	0.31 - 0.58	0.000505052
ILMN_1660723	RDH13	19	7.01945e+07	0.454	0.26 - 0.61	0.33 - 0.57	0.000505933
ILMN_1778013	PDPR	16	5.55559e+07	0.466	0.27 - 0.62	0.33 - 0.59	0.000505933
ILMN_2332105	WRNIP1	6	2.78573e+06	0.456	0.26 - 0.61	0.32 - 0.59	0.00050801
ILMN_1696003	GNAI3	1	7.63696e+07	0.416	0.24 - 0.57	0.31 - 0.54	0.000508762
ILMN_1915076	AK097900	5	1.10137e+08	0.46	0.26 - 0.61	0.31 - 0.60	0.000508762
ILMN_1685052	DNAH1	3	5.24344e+07	0.422	0.24 - 0.57	0.28 - 0.56	0.000511025
ILMN_1684402	STXBP5	6	1.8703e+07	0.44	0.25 - 0.60	0.30 - 0.57	0.000511541
ILMN_1655611	TSHZ2	20	1.24623e+08	0.458	0.26 - 0.62	0.31 - 0.59	0.000511541
ILMN_1668092	ESAM	11	5.18729e+07	0.46	0.26 - 0.62	0.30 - 0.62	0.000511541
ILMN_3188110	C19orf60	19	1.47707e+08	0.473	0.27 - 0.63	0.33 - 0.60	0.000511541
ILMN_1749009	REXO2	11	1.14321e+08	0.465	0.26 - 0.62	0.31 - 0.60	0.000513518
ILMN_1725705	CLPP	19	6.36866e+06	0.446	0.25 - 0.60	0.28 - 0.59	0.000516265
ILMN_2383516	WDR7	18	5.46966e+07	0.446	0.25 - 0.60	0.30 - 0.60	0.000517677
ILMN_1695711	FAM105A	5	1.46104e+07	0.454	0.26 - 0.61	0.33 - 0.59	0.000525009
ILMN_1787186	NOV	8	1.20436e+08	0.458	0.26 - 0.61	0.31 - 0.59	0.000525066
ILMN_2083833	CNOT6L	4	7.86384e+07	0.488	0.28 - 0.65	0.33 - 0.64	0.00052745
ILMN_1747775	STX2	12	1.31275e+08	0.462	0.26 - 0.62	0.30 - 0.60	0.000527789
ILMN_1680781	C14orf135	14	6.0601e+07	0.425	0.24 - 0.58	0.28 - 0.57	0.000527795
ILMN_2348487	EMR3	19	1.47301e+07	0.523	0.30 - 0.69	0.35 - 0.69	0.000529423
ILMN_1691341	IL7R	5	3.58793e+07	0.451	0.25 - 0.61	0.31 - 0.64	0.000529868
ILMN_2177832	TOR2A	9	7.17135e+07	0.417	0.23 - 0.57	0.27 - 0.55	0.000533935
ILMN_2334296	IL18BP	11	1.30495e+08	0.474	0.27 - 0.63	0.31 - 0.61	0.000533935
ILMN_3235922	C11orf21	11	2.31758e+06	0.42	0.24 - 0.57	0.28 - 0.61	0.000535218
ILMN_1716816	TMEM87A	15	4.25029e+07	0.422	0.24 - 0.58	0.27 - 0.59	0.0005364
ILMN_1667460	SULF2	20	4.62866e+07	0.513	0.29 - 0.68	0.37 - 0.68	0.000537648
ILMN_1771233	CHMP4B	20	3.24419e+07	0.437	0.25 - 0.59	0.31 - 0.56	0.000537898
ILMN_1802646	EPHB6	7	1.42569e+08	0.441	0.25 - 0.59	0.30 - 0.59	0.000539841
ILMN_2047240	ARSA	22	5.10635e+07	0.423	0.24 - 0.57	0.31 - 0.53	0.000541471
ILMN_1696512	AHSP	16	3.15401e+07	0.452	0.26 - 0.61	0.31 - 0.58	0.000546323
ILMN_2255133	BCL11A	2	6.06844e+07	0.473	0.27 - 0.64	0.31 - 0.66	0.000547945
ILMN_1745343	ZMAT2	5	1.40086e+08	0.436	0.25 - 0.59	0.26 - 0.59	0.000551916
ILMN_1733103	NCRNA00174	7	6.58413e+07	0.436	0.25 - 0.59	0.29 - 0.58	0.000552313
ILMN_1712027	RSBN1L	7	7.74086e+07	0.45	0.25 - 0.61	0.34 - 0.57	0.000554504
ILMN_1734476	KIF2A	5	61681849	0.431	0.24 - 0.58	0.29 - 0.58	0.000555198
ILMN_2152465	PIP4K2A	10	1.33605e+08	0.422	0.24 - 0.57	0.30 - 0.54	0.000557942
ILMN_1808590	GUCY1A3	4	1.56643e+08	0.444	0.25 - 0.60	0.31 - 0.58	0.000557942
ILMN_1791596	FLJ46300	10	2.28261e+07	0.447	0.25 - 0.60	0.31 - 0.60	0.000557942
ILMN_2320330	MAL	2	1.75394e+08	0.426	0.24 - 0.58	0.30 - 0.56	0.000561605
ILMN_2298936	THOC3	5	9.57192e+07	0.463	0.26 - 0.62	0.31 - 0.65	0.000561605
ILMN_1769926	DBN1	5	35660632	0.419	0.24 - 0.57	0.27 - 0.56	0.000561815
ILMN_1699545	PCSK7	11	5.61645e+07	0.426	0.24 - 0.58	0.32 - 0.53	0.000561815
ILMN_1682567	CCDC106	19	1.17076e+08	0.46	0.26 - 0.61	0.33 - 0.59	0.000561815
ILMN_1709630	CCDC107	9	1.76884e+08	0.47	0.27 - 0.63	0.34 - 0.61	0.000561815
ILMN_1747630	DEK	6	1.82249e+07	0.428	0.24 - 0.58	0.29 - 0.56	0.000565065
ILMN_2089329	SPRY2	13	8.09102e+07	0.434	0.24 - 0.59	0.29 - 0.56	0.00056552
ILMN_1757129	TMEM88	17	7.75927e+06	0.49	0.28 - 0.65	0.35 - 0.63	0.00056631
ILMN_1773380	UNC13D	17	7.38236e+07	0.442	0.25 - 0.59	0.30 - 0.59	0.000568849
ILMN_1724293	KDELR2	7	6.50273e+06	0.452	0.26 - 0.61	0.31 - 0.63	0.000572051
ILMN_1693317	TTC15	2	3.48302e+06	0.454	0.26 - 0.61	0.29 - 0.60	0.000573362
ILMN_1671818	UTS2	1	7.91091e+06	0.437	0.24 - 0.59	0.27 - 0.60	0.00057405
ILMN_1699071	C21orf7	21	1.12271e+08	0.465	0.26 - 0.62	0.32 - 0.58	0.000575566
ILMN_1656501	DUSP5	10	3.05479e+07	0.468	0.26 - 0.63	0.32 - 0.60	0.000575566
ILMN_1669281	CLN3	16	2.84889e+07	0.461	0.26 - 0.62	0.32 - 0.61	0.000576337
ILMN_1838313	LRRC8B	1	8.67195e+07	0.424	0.24 - 0.58	0.28 - 0.59	0.000576511
ILMN_1722532	KDM3A	2	9.0062e+07	0.425	0.24 - 0.58	0.29 - 0.55	0.000576511
ILMN_3223126	TYMP	22	5.09657e+07	0.42	0.23 - 0.57	0.30 - 0.55	0.000578097
ILMN_1892638	AL049980	11	4.38813e+07	0.477	0.27 - 0.63	0.33 - 0.62	0.000582453
ILMN_1774901	GDPD3	16	3.01195e+07	0.411	0.23 - 0.56	0.29 - 0.53	0.000582506
ILMN_1651950	TPST1	7	6.58251e+07	0.433	0.24 - 0.59	0.27 - 0.62	0.00058265
ILMN_3235168	MUL1	1	2.0826e+07	0.461	0.26 - 0.62	0.33 - 0.59	0.000583253
ILMN_1755727	KDM5B	1	2.02697e+08	0.533	0.30 - 0.70	0.37 - 0.66	0.00058492
ILMN_2355033	KIAA1147	7	1.41357e+08	0.439	0.25 - 0.60	0.30 - 0.62	0.000588677
ILMN_1744963	ERO1L	14	5.31087e+07	0.429	0.24 - 0.58	0.30 - 0.57	0.000594561
ILMN_1809384	CYP4F12	19	1.58078e+07	0.437	0.25 - 0.59	0.32 - 0.55	0.000594682
ILMN_2097790	C1orf86	1	2.12118e+06	0.41	0.23 - 0.56	0.29 - 0.53	0.000594941
ILMN_1712944	AES	19	3.05329e+06	0.441	0.25 - 0.60	0.28 - 0.60	0.000596197
ILMN_1777976	SLC25A26	3	6.62871e+07	0.431	0.24 - 0.58	0.27 - 0.62	0.000596861
ILMN_1718336	C7orf50	7	1.0367e+06	0.439	0.25 - 0.59	0.29 - 0.58	0.000597906
ILMN_1686968	ZNF362	1	3.37659e+07	0.467	0.26 - 0.63	0.29 - 0.62	0.000600227
ILMN_1657509	TSEN54	17	7.35206e+07	0.448	0.25 - 0.61	0.33 - 0.60	0.000603178
ILMN_2358733	TAZ	X	1.53649e+08	0.409	0.23 - 0.56	0.28 - 0.55	0.000603515
ILMN_1664063	FAM129C	19	17664367	0.438	0.25 - 0.59	0.29 - 0.59	0.000604259
ILMN_1751871	STK11	19	1.22811e+06	0.417	0.23 - 0.57	0.27 - 0.57	0.000605055
ILMN_1754234	ZMYND11	10	300238	0.434	0.24 - 0.59	0.28 - 0.58	0.000609358
ILMN_1762861	HLA-F	6	1.20835e+06	0.44	0.25 - 0.60	0.28 - 0.64	0.000610498
ILMN_1741281	RNF175	4	1.54632e+08	0.428	0.24 - 0.58	0.29 - 0.56	0.000612683
ILMN_1781184	X84075	11	4.73531e+07	0.449	0.26 - 0.60	0.31 - 0.58	0.000614914
ILMN_1885771	FLJ42351	2	7.31021e+07	0.417	0.23 - 0.57	0.31 - 0.53	0.000615604
ILMN_1755649	SLC16A5	17	1.13399e+08	0.452	0.25 - 0.61	0.31 - 0.59	0.000615604
ILMN_1772208	CCDC88B	11	1.14305e+08	0.442	0.25 - 0.60	0.29 - 0.57	0.000616041
ILMN_1791097	RSBN1	1	6.41245e+07	0.447	0.25 - 0.60	0.30 - 0.59	0.000616041
ILMN_1770206	GEMIN4	17	648030	0.453	0.26 - 0.61	0.29 - 0.60	0.000616113
ILMN_2307656	AGTRAP	1	1.18105e+07	0.448	0.25 - 0.61	0.29 - 0.62	0.000616355
ILMN_3237641	DKFZp564F1378	14	5.77559e+07	0.433	0.24 - 0.59	0.30 - 0.57	0.000616556
ILMN_1782222	KIAA1033	12	1.05563e+08	0.433	0.24 - 0.59	0.28 - 0.57	0.000616839
ILMN_2094396	LRRC8C	1	9.01801e+07	0.435	0.25 - 0.59	0.30 - 0.56	0.000616986
ILMN_1758055	YIF1B	19	3.87959e+07	0.46	0.26 - 0.62	0.31 - 0.60	0.000617735
ILMN_1659415	LAMTOR3	4	1.00803e+08	0.436	0.24 - 0.59	0.26 - 0.61	0.000621482
ILMN_2221564	LYAR	4	4.26971e+06	0.456	0.26 - 0.62	0.29 - 0.63	0.00062414
ILMN_2236625	UTS2	1	1.73954e+07	0.425	0.24 - 0.58	0.27 - 0.59	0.000625455
ILMN_3236732	LOC100129637	16	8.77322e+07	0.446	0.25 - 0.60	0.29 - 0.70	0.000625455
ILMN_1771223	PADI2	1	7.91339e+06	0.471	0.27 - 0.63	0.32 - 0.61	0.000625455
ILMN_1786847	TGM3	20	1.27639e+08	0.457	0.26 - 0.62	0.30 - 0.60	0.000629221
ILMN_2043816	ARPC5L	9	2.32162e+06	0.458	0.26 - 0.62	0.30 - 0.62	0.000629221
ILMN_1733305	EIF2A	3	1.50299e+08	0.442	0.25 - 0.60	0.32 - 0.57	0.000629821
ILMN_1754811	FBXO38	5	1.47822e+08	0.43	0.24 - 0.59	0.28 - 0.59	0.000629981
ILMN_2313926	CDC42SE2	5	1.3073e+08	0.443	0.25 - 0.60	0.29 - 0.59	0.000630816
ILMN_1787567	TSC22D1	13	4.50081e+07	0.448	0.25 - 0.61	0.26 - 0.66	0.0006312
ILMN_1658182	MEX3C	18	4.87013e+07	0.494	0.28 - 0.66	0.35 - 0.62	0.000633865
ILMN_1772370	ARHGEF1	19	4.24108e+07	0.417	0.23 - 0.57	0.29 - 0.57	0.000637671
ILMN_1825186	LOC338817	12	11709411	0.435	0.24 - 0.59	0.29 - 0.58	0.000648381
ILMN_2230672	MRPL18	6	1.5044e+08	0.425	0.24 - 0.58	0.28 - 0.57	0.000649515
ILMN_1769383	GIMAP5	7	1.60219e+08	0.46	0.25 - 0.62	0.29 - 0.60	0.000649515
ILMN_1715024	LSS	21	4.76094e+07	0.43	0.24 - 0.59	0.28 - 0.57	0.000650397
ILMN_1736863	TMEM140	7	1.3485e+08	0.489	0.28 - 0.65	0.33 - 0.66	0.000651272
ILMN_1772487	SUGP2	19	1.91052e+07	0.423	0.24 - 0.58	0.30 - 0.55	0.000651556
ILMN_1693552	CD300A	17	7.24806e+07	0.439	0.25 - 0.60	0.30 - 0.59	0.000652096
ILMN_2180352	DIP2B	12	5.11422e+07	0.458	0.26 - 0.62	0.34 - 0.57	0.000654795
ILMN_1758633	CCDC130	19	1.38741e+07	0.409	0.23 - 0.56	0.26 - 0.57	0.000657094
ILMN_1727740	SYNCRIP	6	8.63243e+07	0.413	0.23 - 0.56	0.30 - 0.56	0.000660004
ILMN_3238375	CENPT	16	6.78624e+07	0.46	0.26 - 0.62	0.31 - 0.61	0.000661559
ILMN_1800451	MED16	19	867994	0.421	0.23 - 0.58	0.29 - 0.56	0.000661748
ILMN_2087692	CYBRD1	2	1.72414e+08	0.447	0.25 - 0.60	0.30 - 0.60	0.000662306
ILMN_1654685	MCTP1	5	9.40466e+07	0.409	0.23 - 0.56	0.27 - 0.54	0.000665491
ILMN_1762615	FAM175B	10	1.26525e+08	0.462	0.26 - 0.62	0.31 - 0.61	0.000665908
ILMN_1801822	C18orf25	18	4.38467e+07	0.452	0.25 - 0.61	0.32 - 0.58	0.000667675
ILMN_1798204	IL21R	16	2.74618e+07	0.424	0.24 - 0.58	0.29 - 0.55	0.000673814
ILMN_1765578	TIPARP	3	1.56424e+08	0.431	0.24 - 0.59	0.29 - 0.56	0.000674268
ILMN_1891944	AA458608	16	3.35157e+07	0.433	0.24 - 0.59	0.29 - 0.58	0.000682664
ILMN_2336595	ACSS2	20	3.28677e+06	0.459	0.26 - 0.62	0.29 - 0.63	0.000682664
ILMN_1736911	TMOD1	9	1.00362e+08	0.44	0.24 - 0.60	0.29 - 0.56	0.000683689
ILMN_1788887	LOC338799	12	1.22233e+08	0.413	0.23 - 0.56	0.28 - 0.57	0.000687608
ILMN_1692486	ZNRD1	6	1270029	0.422	0.23 - 0.58	0.26 - 0.59	0.000692356
ILMN_1701837	KLHL2	4	1.66244e+08	0.411	0.23 - 0.56	0.29 - 0.54	0.000692586
ILMN_2352921	BPGM	7	1.34364e+08	0.451	0.25 - 0.61	0.30 - 0.59	0.000695043
ILMN_1695157	CA4	17	5.82368e+07	0.422	0.23 - 0.58	0.31 - 0.54	0.000695096
ILMN_1720083	EHD4	15	4.21919e+07	0.452	0.25 - 0.61	0.30 - 0.60	0.000696212
ILMN_1807825	LY86	6	6.65503e+06	0.418	0.23 - 0.57	0.28 - 0.59	0.000696265
ILMN_1807074	MIF	22	2.42371e+07	0.431	0.24 - 0.58	0.31 - 0.54	0.000696681
ILMN_1721833	IER5	1	1.8106e+08	0.453	0.25 - 0.61	0.31 - 0.64	0.00069759
ILMN_1766169	BCAT1	12	2.49649e+07	0.418	0.23 - 0.57	0.29 - 0.55	0.000699827
ILMN_2407082	SEPT15	1	8.73288e+07	0.424	0.24 - 0.58	0.30 - 0.55	0.000705665
ILMN_1784333	SECISBP2L	15	4.92812e+07	0.416	0.23 - 0.57	0.26 - 0.57	0.000714404
ILMN_1651438	ZFPM1	16	8.86013e+07	0.482	0.27 - 0.65	0.34 - 0.61	0.000715254
ILMN_1686662	C15orf28	15	8.12427e+06	0.43	0.24 - 0.59	0.29 - 0.63	0.000715613
ILMN_1662340	ZNF358	19	7.58588e+06	0.434	0.24 - 0.59	0.31 - 0.57	0.000715613
ILMN_1681252	C17orf44	17	6.90966e+07	0.44	0.25 - 0.60	0.30 - 0.57	0.000715613
ILMN_2341724	ANKRD55	5	5.5396e+07	0.452	0.25 - 0.61	0.29 - 0.64	0.000719133
ILMN_1679185	LEF1	4	1.08969e+08	0.437	0.24 - 0.59	0.30 - 0.57	0.000719758
ILMN_1726169	EDF1	9	1.39757e+08	0.422	0.23 - 0.58	0.28 - 0.56	0.000722342
ILMN_1769633	CTSO	4	1.56846e+08	0.442	0.24 - 0.60	0.31 - 0.57	0.000726188
ILMN_1804332	GPR137	11	2.46079e+07	0.44	0.24 - 0.60	0.30 - 0.57	0.000729493
ILMN_1726698	PSME1	14	6.40569e+07	0.442	0.25 - 0.60	0.29 - 0.59	0.000729493
ILMN_1726189	MS4A14	11	6.01848e+07	0.406	0.22 - 0.56	0.27 - 0.54	0.000729632
ILMN_1730416	CYCS	7	2.51587e+07	0.43	0.24 - 0.59	0.29 - 0.57	0.000732257
ILMN_3256478	LOC100129034	9	1.27121e+08	0.426	0.24 - 0.58	0.29 - 0.55	0.000733419
ILMN_1654823	MGC70863	22	5.12225e+07	0.441	0.24 - 0.60	0.32 - 0.56	0.000733513
ILMN_1678998	LRRC14	8	1.4575e+08	0.412	0.23 - 0.57	0.28 - 0.54	0.000734093
ILMN_3253456	FNDC3B	3	220489837	0.413	0.23 - 0.57	0.27 - 0.54	0.00073459
ILMN_1896471	BE041638	2	1.72118e+08	0.419	0.23 - 0.57	0.27 - 0.57	0.00073459
ILMN_1689318	NUAK1	12	1.06458e+08	0.44	0.24 - 0.60	0.30 - 0.57	0.000736914
ILMN_1668012	SLC25A13	7	9.57498e+07	0.439	0.24 - 0.60	0.33 - 0.55	0.000738783
ILMN_1728107	GNG7	19	2.51142e+06	0.424	0.24 - 0.58	0.28 - 0.59	0.000740775
ILMN_1745262	REM2	14	2.33567e+07	0.429	0.24 - 0.58	0.29 - 0.58	0.000743362
ILMN_1680652	SELENBP1	1	1.51337e+08	0.43	0.24 - 0.59	0.29 - 0.55	0.0007443
ILMN_1730048	C7orf26	7	4.87596e+07	0.422	0.23 - 0.57	0.29 - 0.55	0.000753999
ILMN_2325234	PQBP1	X	6.64814e+06	0.423	0.23 - 0.58	0.27 - 0.59	0.000753999
ILMN_1735415	NUDT16L1	16	4.3304e+07	0.386	0.21 - 0.53	0.24 - 0.52	0.000757141
ILMN_1792305	ZNF318	6	4.74555e+06	0.421	0.23 - 0.58	0.26 - 0.57	0.000757141
ILMN_1685480	TARS	5	3.34678e+07	0.421	0.23 - 0.57	0.28 - 0.57	0.000759629
ILMN_2184184	ANXA1	9	7.5785e+07	0.421	0.23 - 0.58	0.27 - 0.57	0.000763972
ILMN_1794399	SNRK	3	5.34704e+07	0.432	0.24 - 0.59	0.30 - 0.57	0.000765755
ILMN_1733937	MMD	17	4.33921e+07	0.437	0.24 - 0.60	0.30 - 0.58	0.000765755
ILMN_1711878	ENOPH1	4	8.33819e+07	0.45	0.25 - 0.61	0.31 - 0.59	0.000771048
ILMN_2176955	CUL5	11	1.07978e+08	0.432	0.24 - 0.59	0.28 - 0.58	0.000773881
ILMN_1776325	UBE2Q1	1	1.54521e+08	0.407	0.22 - 0.56	0.27 - 0.54	0.000775453
ILMN_1758906	GNA13	17	6.30074e+07	0.42	0.23 - 0.57	0.27 - 0.59	0.000776277
ILMN_2331205	CHKB	22	5.10179e+07	0.41	0.23 - 0.56	0.26 - 0.56	0.000778413
ILMN_1737988	PRNP	20	4.68205e+06	0.448	0.25 - 0.61	0.30 - 0.60	0.000779481
ILMN_1698367	CD84	1	1.60516e+08	0.416	0.23 - 0.57	0.29 - 0.55	0.000784911
ILMN_1660533	RPN1	3	2.90703e+07	0.395	0.22 - 0.55	0.25 - 0.55	0.000787337
ILMN_1661342	SEPT6	X	1.18753e+08	0.401	0.22 - 0.55	0.26 - 0.54	0.000787337
ILMN_1682928	CPVL	7	1.28339e+08	0.419	0.23 - 0.58	0.29 - 0.58	0.000787337
ILMN_2328776	MST4	X	1.31209e+08	0.448	0.25 - 0.61	0.30 - 0.60	0.000787885
ILMN_2112357	CD300LF	17	7.26905e+07	0.415	0.23 - 0.57	0.27 - 0.58	0.000790538
ILMN_1772796	DYNLL2	17	5.61666e+07	0.406	0.22 - 0.56	0.26 - 0.55	0.000792371
ILMN_1740604	RAB11FIP5	2	7.33006e+07	0.425	0.24 - 0.58	0.28 - 0.60	0.000797662
ILMN_1737426	PCMTD1	8	5.27304e+07	0.445	0.25 - 0.61	0.30 - 0.59	0.000798201
ILMN_1751500	ADAM15	1	1.55033e+08	0.413	0.23 - 0.57	0.28 - 0.54	0.00080026
ILMN_1775444	AK022140	5	9.31971e+07	0.433	0.24 - 0.59	0.30 - 0.55	0.000800444
ILMN_1788538	NCALD	8	1.02699e+08	0.452	0.25 - 0.61	0.29 - 0.63	0.000801221
ILMN_2094942	MARCH1	4	1.64449e+08	0.432	0.24 - 0.59	0.30 - 0.58	0.000805995
ILMN_3243142	KAT2B	3	2.01956e+07	0.438	0.24 - 0.59	0.28 - 0.59	0.000806344
ILMN_1778684	BRE	2	2.85615e+07	0.435	0.24 - 0.59	0.32 - 0.56	0.00080819
ILMN_1695962	SLC12A9	7	1.00465e+08	0.43	0.24 - 0.58	0.28 - 0.56	0.000814187
ILMN_1781373	IFIH1	2	1.63124e+08	0.433	0.24 - 0.59	0.30 - 0.56	0.000816151
ILMN_1660292	MRPS21	1	1.50267e+08	0.42	0.23 - 0.58	0.28 - 0.58	0.000816315
ILMN_1743646	VASP	19	4.60299e+07	0.43	0.23 - 0.59	0.28 - 0.59	0.000817878
ILMN_1716678	NPC2	14	7.49468e+07	0.436	0.24 - 0.60	0.29 - 0.57	0.00081953
ILMN_1677920	LTF	3	4.64968e+07	0.455	0.25 - 0.62	0.28 - 0.61	0.000819574
ILMN_2355168	MGST1	12	1.65169e+07	0.421	0.23 - 0.58	0.28 - 0.54	0.000820621
ILMN_2067607	TMEM106B	7	1.22767e+07	0.431	0.24 - 0.59	0.29 - 0.58	0.000821693
ILMN_1677768	POR	7	7.56158e+07	0.441	0.24 - 0.60	0.30 - 0.57	0.000822382
ILMN_1773687	YIF1B	19	3.87999e+07	0.432	0.24 - 0.59	0.28 - 0.56	0.000822699
ILMN_1797793	BLVRB	19	4.09537e+07	0.434	0.24 - 0.59	0.28 - 0.57	0.000823044
ILMN_1755415	SAMD3	6	130505598	0.44	0.24 - 0.60	0.34 - 0.54	0.000823481
ILMN_1692225	DOK3	5	1.96883e+07	0.421	0.23 - 0.58	0.27 - 0.55	0.000825566
ILMN_1842533	AL117577	2	1.76931e+08	0.454	0.25 - 0.62	0.30 - 0.61	0.000825566
ILMN_3234948	LOC100130000	1	4.89289e+07	0.415	0.23 - 0.57	0.28 - 0.56	0.00082998
ILMN_1720578	PRAF2	X	1.43705e+08	0.433	0.24 - 0.59	0.29 - 0.57	0.00082998
ILMN_1770641	KLHL3	5	1.36953e+08	0.415	0.23 - 0.57	0.28 - 0.56	0.00083175
ILMN_1697267	PRKCZ	1	2116125	0.421	0.23 - 0.58	0.29 - 0.57	0.000832123
ILMN_3306730	RBM47	4	4.0426e+07	0.447	0.24 - 0.61	0.29 - 0.58	0.000834579
ILMN_2203544	OR2A9P	7	1.43948e+08	0.46	0.25 - 0.62	0.29 - 0.61	0.00083678
ILMN_1703314	KLHL36	16	8.46958e+07	0.394	0.21 - 0.55	0.28 - 0.52	0.000841045
ILMN_2324672	USF2	19	1.20023e+08	0.408	0.22 - 0.56	0.23 - 0.58	0.000844711
ILMN_2383349	STEAP3	2	3.57699e+07	0.414	0.23 - 0.57	0.28 - 0.53	0.000844711
ILMN_1722634	NUCB1	19	3.12131e+07	0.423	0.23 - 0.58	0.29 - 0.55	0.000845925
ILMN_1807529	PADI4	1	1.76904e+07	0.441	0.24 - 0.60	0.29 - 0.61	0.000845925
ILMN_1698766	PYCARD	16	4.94265e+07	0.454	0.25 - 0.62	0.29 - 0.61	0.000845925
ILMN_1775380	SMOX	20	7.46099e+06	0.426	0.23 - 0.58	0.31 - 0.55	0.000851677
ILMN_1683700	TNFSF13	17	4.1683e+06	0.436	0.24 - 0.60	0.29 - 0.59	0.000851677
ILMN_2367233	ZNF654	3	8.81901e+07	0.423	0.23 - 0.58	0.28 - 0.57	0.000852358
ILMN_1733581	C16orf35	16	134568	0.419	0.23 - 0.57	0.30 - 0.56	0.000854227
ILMN_1791702	SMARCA2	9	2.19353e+06	0.404	0.22 - 0.56	0.25 - 0.57	0.00085797
ILMN_1796968	INTS5	11	7.55614e+07	0.444	0.24 - 0.60	0.30 - 0.59	0.000859677
ILMN_1669433	KIAA0913	10	6.24145e+07	0.455	0.25 - 0.61	0.32 - 0.61	0.000859677
ILMN_1705984	HNMT	2	1.38773e+08	0.417	0.23 - 0.57	0.27 - 0.58	0.000863043
ILMN_2331082	MS4A7	11	6.01629e+07	0.436	0.24 - 0.60	0.32 - 0.57	0.000864111
ILMN_1723185	ELOF1	19	1.16642e+07	0.429	0.23 - 0.59	0.30 - 0.55	0.000867525
ILMN_1751963	ZCWPW1	7	9.99986e+07	0.435	0.24 - 0.59	0.30 - 0.56	0.000868714
ILMN_1680757	LRRC26	9	1.40063e+08	0.419	0.23 - 0.57	0.28 - 0.58	0.000868983
ILMN_1693826	HAVCR2	5	1.56513e+08	0.454	0.25 - 0.62	0.31 - 0.59	0.000871291
ILMN_1793269	RAB37	17	7.27429e+07	0.428	0.23 - 0.59	0.27 - 0.63	0.000871598
ILMN_1788384	C9orf5	9	1.11778e+08	0.424	0.23 - 0.58	0.29 - 0.55	0.000875253
ILMN_2055760	KIAA1715	2	1.76791e+08	0.441	0.24 - 0.60	0.30 - 0.61	0.000875944
ILMN_1784630	KBTBD11	8	1.95496e+06	0.482	0.26 - 0.65	0.30 - 0.66	0.000878925
ILMN_1749868	FAM171A1	10	1.5254e+07	0.417	0.23 - 0.57	0.28 - 0.54	0.00088053
ILMN_3248026	RBM27	5	1.45668e+08	0.422	0.23 - 0.58	0.28 - 0.57	0.000881705
ILMN_2234310	GLTPD1	1	1.26414e+06	0.455	0.25 - 0.62	0.31 - 0.67	0.000884678
ILMN_1903914	AK129699	7	1.09878e+06	0.408	0.22 - 0.56	0.28 - 0.53	0.000885866
ILMN_1684227	GPR146	7	1.30615e+08	0.438	0.24 - 0.60	0.29 - 0.57	0.000885866
ILMN_1671237	GNGT2	17	4.72839e+07	0.485	0.27 - 0.65	0.30 - 0.67	0.00088596
ILMN_1764850	HPCAL1	2	1.05676e+07	0.428	0.23 - 0.59	0.29 - 0.55	0.000889133
ILMN_1743131	TOX4	14	2.19669e+07	0.399	0.21 - 0.56	0.27 - 0.53	0.000892444
ILMN_2175447	UNQ5808	7	1.49244e+08	0.415	0.23 - 0.57	0.29 - 0.57	0.000896894
ILMN_1803941	TBC1D15	12	7.23169e+07	0.433	0.23 - 0.60	0.29 - 0.56	0.000897804
ILMN_3251511	SCAF11	12	4.63131e+07	0.436	0.24 - 0.60	0.27 - 0.60	0.000907377
ILMN_2187727	NOC3L	10	9.60931e+07	0.432	0.23 - 0.59	0.27 - 0.58	0.000914415
ILMN_1802888	ZNF185	X	1.52142e+08	0.442	0.24 - 0.61	0.30 - 0.57	0.00092059
ILMN_2335072	TAF1C	16	8.42122e+07	0.425	0.23 - 0.58	0.31 - 0.53	0.000923782
ILMN_1718610	ARHGAP17	16	2.49309e+07	0.436	0.24 - 0.60	0.30 - 0.59	0.000925586
ILMN_1706217	TLR4	9	1.20477e+08	0.403	0.22 - 0.56	0.28 - 0.53	0.000934909
ILMN_1701514	TRAF3IP2	6	1.1188e+08	0.429	0.23 - 0.59	0.28 - 0.59	0.000940475
ILMN_1671693	C18orf10	18	3.43766e+07	0.424	0.23 - 0.58	0.27 - 0.55	0.000940957
ILMN_2391419	SYNE2	14	6.46926e+07	0.425	0.23 - 0.58	0.28 - 0.61	0.000941263
ILMN_1741176	CHMP2B	3	264980	0.402	0.22 - 0.56	0.26 - 0.53	0.000943655
ILMN_1736340	ANGEL2	1	2.13166e+08	0.452	0.24 - 0.62	0.30 - 0.58	0.000943655
ILMN_2344956	ACP1	2	8.73038e+07	0.465	0.25 - 0.63	0.31 - 0.62	0.000943655
ILMN_2358202	SRRT	7	1.00486e+08	0.445	0.24 - 0.61	0.29 - 0.58	0.000943955
ILMN_1697629	JMJD7-PLA2G4B	15	4.21403e+07	0.385	0.21 - 0.53	0.26 - 0.52	0.000944618
ILMN_3236036	LOC283663	15	5.75992e+07	0.417	0.23 - 0.57	0.27 - 0.59	0.000945361
ILMN_1802457	MAX	14	6.55507e+07	0.407	0.22 - 0.56	0.28 - 0.54	0.000947768
ILMN_2352036	RTN4	2	8.88762e+07	0.405	0.22 - 0.56	0.28 - 0.53	0.000948494
ILMN_3224934	SFRS18	6	9.98482e+07	0.415	0.22 - 0.57	0.25 - 0.59	0.000948494
ILMN_1722491	APRT	16	5.51998e+07	0.423	0.23 - 0.58	0.28 - 0.57	0.000948494
ILMN_2094106	HSD17B12	11	4.38779e+07	0.448	0.24 - 0.62	0.29 - 0.59	0.000949538
ILMN_2359710	PTP4A3	8	5.4686e+07	0.407	0.22 - 0.56	0.25 - 0.56	0.000949758
ILMN_2054233	SENP6	6	7.64193e+07	0.417	0.23 - 0.58	0.28 - 0.55	0.000949758
ILMN_1711786	NFE2	12	1.42441e+08	0.433	0.24 - 0.59	0.29 - 0.59	0.000949758
ILMN_1793743	DIRC2	3	1.22598e+08	0.443	0.24 - 0.60	0.30 - 0.55	0.000950566
ILMN_1681437	DCXR	17	7.99938e+07	0.44	0.24 - 0.60	0.30 - 0.60	0.000951088
ILMN_1747857	SMARCE1	17	3.87841e+07	0.451	0.25 - 0.61	0.30 - 0.61	0.000956493
ILMN_1732071	HIST2H2BE	1	1.49856e+08	0.461	0.25 - 0.63	0.32 - 0.60	0.000958643
ILMN_1705047	TLR8	X	1.29402e+07	0.403	0.22 - 0.55	0.26 - 0.57	0.00096991
ILMN_2221673	ASNSD1	2	1.90533e+08	0.41	0.22 - 0.57	0.27 - 0.58	0.00097101
ILMN_1770412	AHCYL1	1	1.10565e+08	0.459	0.25 - 0.62	0.29 - 0.62	0.000973967
ILMN_2405602	OSBPL1A	18	2.17432e+07	0.423	0.23 - 0.59	0.28 - 0.59	0.000975715
ILMN_1821517	X64709	M	8268	0.451	0.25 - 0.61	0.28 - 0.63	0.000981492
ILMN_1787808	CEP63	3	1.3428e+08	0.414	0.22 - 0.57	0.27 - 0.55	0.000982127
ILMN_1795026	FAM189B	1	1.55217e+08	0.431	0.23 - 0.59	0.26 - 0.59	0.000983158
ILMN_1727045	RASGRP3	2	29652859	0.424	0.23 - 0.58	0.30 - 0.56	0.000983686
ILMN_1751551	KSR2	12	1.18298e+08	0.428	0.23 - 0.58	0.31 - 0.55	0.000983686
ILMN_1821176	RNF125	18	3.37895e+07	0.472	0.26 - 0.64	0.33 - 0.60	0.000983686
ILMN_1690783	TREML1	6	4.11175e+07	0.474	0.26 - 0.64	0.29 - 0.61	0.000985511
ILMN_2369580	C16orf35	16	135872	0.429	0.23 - 0.59	0.29 - 0.62	0.000986302
ILMN_1720373	SLC7A5	16	8.78638e+07	0.442	0.24 - 0.61	0.28 - 0.61	0.000986846
ILMN_2048982	ZBTB25	14	6.49537e+07	0.467	0.26 - 0.63	0.34 - 0.60	0.000988478
ILMN_2138765	PLIN2	9	1.91162e+07	0.397	0.21 - 0.55	0.25 - 0.52	0.000990912
ILMN_1703142	MARCH2	19	1.59186e+08	0.425	0.23 - 0.58	0.29 - 0.54	0.000991929
ILMN_1770020	PPIL3	2	5.23306e+07	0.428	0.23 - 0.59	0.30 - 0.56	0.000991929
ILMN_1802292	WDFY2	13	2.01736e+08	0.429	0.23 - 0.59	0.28 - 0.57	0.000991929
ILMN_1720623	SYTL3	6	8.50369e+06	0.45	0.25 - 0.61	0.29 - 0.62	0.000991929
ILMN_2278636	CUX1	7	1.01893e+08	0.432	0.23 - 0.59	0.28 - 0.63	0.000993258
ILMN_1724066	PLCB2	15	8.42234e+07	0.447	0.25 - 0.61	0.31 - 0.56	0.000994223
ILMN_2092850	HPSE	4	4.05803e+07	0.47	0.25 - 0.64	0.30 - 0.63	0.000994223
ILMN_1857335	AX747706	9	1.39444e+08	0.418	0.22 - 0.58	0.28 - 0.55	0.000995065
ILMN_2373266	SREK1	5	6.54764e+07	0.418	0.23 - 0.58	0.29 - 0.55	0.000995183
ILMN_3228585	SLC35E2B	1	2.13532e+07	0.387	0.21 - 0.54	0.23 - 0.58	0.000997796
ILMN_1805161	LZTR1	22	1.59349e+06	0.427	0.23 - 0.58	0.27 - 0.56	0.000997796
ILMN_1687533	SEMA4D	9	9.19924e+07	0.457	0.25 - 0.62	0.30 - 0.59	0.000998655
ILMN_3303965	ZC3H11A	1	2.03823e+08	0.396	0.21 - 0.55	0.26 - 0.53	0.000999697
ILMN_1701466	PEX16	11	4.59318e+07	0.395	0.21 - 0.55	0.27 - 0.50	0.00100041
ILMN_2396786	ZNF266	19	9.5238e+06	0.428	0.23 - 0.59	0.28 - 0.59	0.00100581
ILMN_1815366	ENGASE	17	5.7611e+07	0.415	0.22 - 0.57	0.25 - 0.56	0.00101048
ILMN_1796106	MGAT4B	5	1.79225e+08	0.421	0.23 - 0.58	0.26 - 0.58	0.00101048
ILMN_1666902	GPR114	16	7.70844e+07	0.44	0.24 - 0.60	0.29 - 0.59	0.00101048
ILMN_1740010	PCNX	14	4.96203e+07	0.411	0.22 - 0.57	0.30 - 0.54	0.00101162
ILMN_1673769	KCNG1	20	7.15768e+07	0.415	0.23 - 0.57	0.28 - 0.54	0.00101162
ILMN_2339796	CDC16	13	3.90863e+07	0.403	0.22 - 0.56	0.26 - 0.64	0.00101504
ILMN_1791545	KRT23	17	1.15038e+08	0.428	0.23 - 0.59	0.27 - 0.62	0.00101504
ILMN_1804629	TPK1	7	1.44149e+08	0.416	0.22 - 0.58	0.27 - 0.58	0.00101512
ILMN_1653618	ZZZ3	1	7.80307e+07	0.425	0.23 - 0.59	0.28 - 0.56	0.00101907
ILMN_1655011	SERF1B	5	6.93212e+07	0.421	0.23 - 0.58	0.28 - 0.58	0.00101936
ILMN_2246328	PTPN22	1	1.14357e+08	0.425	0.23 - 0.59	0.27 - 0.56	0.00102091
ILMN_1772731	HAGH	16	1.85926e+06	0.415	0.23 - 0.57	0.29 - 0.54	0.00102323
ILMN_1731745	NINJ2	12	4.33925e+07	0.42	0.23 - 0.58	0.28 - 0.56	0.00102355
ILMN_3296958	CLEC4O	19	1.59629e+07	0.424	0.23 - 0.58	0.28 - 0.59	0.00102355
ILMN_2107184	SNRK	3	673562	0.43	0.23 - 0.59	0.28 - 0.58	0.00102355
ILMN_1657744	C15orf17	15	5.0321e+07	0.397	0.21 - 0.55	0.27 - 0.51	0.00102935
ILMN_2385866	PHF1	6	3.3384e+07	0.415	0.22 - 0.58	0.27 - 0.56	0.00102935
ILMN_1748707	CRELD2	22	7.51934e+07	0.427	0.23 - 0.59	0.31 - 0.55	0.00102935
ILMN_2125747	CORO1A	16	3.02002e+07	0.42	0.23 - 0.58	0.28 - 0.57	0.00103688
ILMN_1762712	HHEX	10	9.44552e+07	0.426	0.23 - 0.59	0.29 - 0.56	0.00103871
ILMN_2403852	CYTH1	17	7.66705e+07	0.416	0.22 - 0.57	0.29 - 0.54	0.00104355
ILMN_1658160	FAM156B	X	52937201	0.408	0.22 - 0.56	0.29 - 0.53	0.00104467
ILMN_1726306	HMBS	11	1.18964e+08	0.443	0.24 - 0.61	0.28 - 0.57	0.0010451
ILMN_1655608	KLHL18	3	4.7388e+07	0.427	0.23 - 0.59	0.29 - 0.57	0.00104916
ILMN_1786532	CNIH	14	9.40198e+06	0.422	0.23 - 0.58	0.31 - 0.54	0.00105496
ILMN_2093500	ZBED5	11	1.08746e+07	0.429	0.23 - 0.59	0.28 - 0.57	0.00105496
ILMN_2214144	TWSG1	18	5.48989e+07	0.445	0.24 - 0.61	0.30 - 0.59	0.00105496
ILMN_1788457	ABCC4	13	4.07664e+07	0.416	0.22 - 0.57	0.28 - 0.56	0.00105915
ILMN_1678032	NR1H2	19	5.08859e+07	0.424	0.23 - 0.58	0.28 - 0.57	0.00105915
ILMN_1685122	COL9A2	1	9.56726e+07	0.447	0.24 - 0.61	0.28 - 0.62	0.00105915
ILMN_1710434	TBC1D10C	11	6.71774e+07	0.39	0.21 - 0.54	0.28 - 0.52	0.00105923
ILMN_1706075	SF3B1	2	1.12265e+08	0.412	0.22 - 0.57	0.26 - 0.58	0.00106639
ILMN_1890614	C1orf183	1	1.98258e+08	0.414	0.22 - 0.57	0.24 - 0.61	0.00106639
ILMN_2347193	GSDMB	17	6887087	0.439	0.24 - 0.60	0.28 - 0.58	0.00106663
ILMN_1813338	LAG3	12	3.80621e+07	0.452	0.25 - 0.61	0.27 - 0.64	0.00106663
ILMN_1659158	SAMD3	6	1.30466e+08	0.428	0.23 - 0.59	0.28 - 0.58	0.0010693
ILMN_1793628	SERPINA10	14	9.47499e+07	0.41	0.22 - 0.57	0.27 - 0.52	0.00107051
ILMN_3242120	RAP1B	12	6.90533e+07	0.419	0.23 - 0.58	0.27 - 0.57	0.00107163
ILMN_1755123	GBA	1	155205485	0.424	0.23 - 0.58	0.28 - 0.55	0.001073
ILMN_1791253	FBXL13	7	1.02454e+08	0.424	0.23 - 0.58	0.29 - 0.56	0.00107801
ILMN_1707077	SORT1	1	1.09853e+08	0.425	0.23 - 0.58	0.27 - 0.56	0.00108248
ILMN_1775330	C15orf52	15	4.06237e+07	0.429	0.23 - 0.59	0.28 - 0.57	0.00108715
ILMN_1657455	CEACAM4	19	1.02182e+08	0.412	0.22 - 0.57	0.26 - 0.58	0.00108998
ILMN_2415235	CSNK1E	22	3.86893e+07	0.413	0.22 - 0.57	0.27 - 0.54	0.00108998
ILMN_1761120	TM2D3	15	42126588	0.43	0.23 - 0.59	0.28 - 0.57	0.00108998
ILMN_2389970	TSPAN32	11	2.33914e+06	0.425	0.23 - 0.59	0.28 - 0.59	0.00109369
ILMN_1700001	TCTA	3	3.41993e+07	0.407	0.22 - 0.57	0.27 - 0.53	0.00109542
ILMN_1773352	CCL5	17	4.94536e+07	0.43	0.23 - 0.59	0.29 - 0.58	0.00109542
ILMN_1655377	MRPS22	3	1.39075e+08	0.442	0.24 - 0.61	0.28 - 0.60	0.0010965
ILMN_3307940	FLJ35776	18	3.59704e+06	0.401	0.21 - 0.56	0.25 - 0.54	0.00111116
ILMN_3241979	TMEM179B	11	6.25574e+07	0.403	0.21 - 0.56	0.22 - 0.57	0.0011112
ILMN_1691112	PIGN	18	5.9712e+07	0.473	0.26 - 0.64	0.33 - 0.60	0.00111313
ILMN_1664233	TMC6	17	76113554	0.391	0.21 - 0.54	0.27 - 0.53	0.00111583
ILMN_1798679	ANO9	11	418514	0.408	0.22 - 0.56	0.28 - 0.54	0.00111848
ILMN_3303612	PABPC1L	20	1.60611e+07	0.383	0.20 - 0.53	0.26 - 0.49	0.0011271
ILMN_1683980	PLEKHM2	1	4.35678e+07	0.434	0.23 - 0.60	0.29 - 0.57	0.0011271
ILMN_2330112	CNIH	14	5.48941e+07	0.457	0.25 - 0.62	0.32 - 0.58	0.00112754
ILMN_1802082	PRDM8	4	8.11252e+07	0.465	0.25 - 0.63	0.32 - 0.62	0.00112862
ILMN_1738656	GLOD4	17	662842	0.428	0.23 - 0.59	0.29 - 0.56	0.00113077
ILMN_1800612	VBP1	X	1.54467e+08	0.411	0.22 - 0.57	0.27 - 0.56	0.00113649
ILMN_1807201	FAM104A	17	7.12036e+07	0.431	0.23 - 0.59	0.29 - 0.58	0.00113994
ILMN_1738272	DHX36	3	1.53994e+08	0.419	0.23 - 0.58	0.28 - 0.56	0.00114199
ILMN_1707175	NSD1	5	1.76563e+08	0.438	0.23 - 0.60	0.29 - 0.57	0.00114465
ILMN_1712888	HSPH1	13	3.17111e+07	0.416	0.22 - 0.58	0.25 - 0.58	0.00114776
ILMN_1708164	EIF3A	10	1.16136e+08	0.422	0.22 - 0.59	0.27 - 0.56	0.00115077
ILMN_1726466	HDHD3	9	1.20795e+08	0.442	0.24 - 0.60	0.29 - 0.58	0.00115077
ILMN_1704376	GLDN	15	1.15943e+07	0.405	0.21 - 0.57	0.25 - 0.54	0.00115163
ILMN_1696276	ZNF653	19	5.17001e+07	0.419	0.23 - 0.58	0.29 - 0.54	0.00115163
ILMN_1657361	CBX7	22	3.95271e+07	0.399	0.21 - 0.56	0.25 - 0.54	0.00115626
ILMN_2316386	GPBAR1	2	2.19129e+08	0.412	0.22 - 0.57	0.27 - 0.56	0.00116811
ILMN_1684255	MYL4	17	45299823	0.407	0.22 - 0.56	0.28 - 0.51	0.00116915
ILMN_1751400	SKAP1	17	4.62109e+07	0.436	0.23 - 0.60	0.29 - 0.61	0.00117013
ILMN_2271875	ALAS2	X	5.50542e+07	0.408	0.22 - 0.57	0.29 - 0.53	0.0011707
ILMN_1731181	TEX2	17	6.2225e+07	0.423	0.23 - 0.58	0.28 - 0.60	0.00117263
ILMN_3281502	WBSCR16	7	4.05359e+07	0.404	0.21 - 0.56	0.25 - 0.55	0.00119757
ILMN_1811921	CSRP1	1	2.01453e+08	0.424	0.23 - 0.58	0.28 - 0.57	0.00119757
ILMN_1859584	AK026751	12	74456502	0.435	0.23 - 0.60	0.30 - 0.60	0.00119757
ILMN_1808779	CSTF3	11	67379442	0.406	0.22 - 0.56	0.28 - 0.54	0.00120057
ILMN_1797342	FNBP1	9	1.91366e+08	0.409	0.22 - 0.56	0.27 - 0.55	0.00120057
ILMN_1710209	MFSD6	2	1.3265e+08	0.412	0.22 - 0.57	0.28 - 0.59	0.00120057
ILMN_1786718	NDUFV1	11	3.31064e+07	0.449	0.24 - 0.61	0.29 - 0.59	0.00120057
ILMN_2228732	CCNG2	4	78087732	0.428	0.23 - 0.59	0.28 - 0.56	0.00120499
ILMN_1797988	KLRD1	12	1.0462e+07	0.447	0.24 - 0.61	0.30 - 0.60	0.00120906
ILMN_2405297	NOTCH2	1	1.20454e+08	0.417	0.22 - 0.58	0.27 - 0.55	0.00121628
ILMN_2321292	WIPI2	7	8.08817e+07	0.436	0.23 - 0.60	0.30 - 0.59	0.0012211
ILMN_3265365	CEP78	9	5.27326e+06	0.44	0.23 - 0.61	0.30 - 0.58	0.0012211
ILMN_1671839	TAF1C	16	1.46064e+08	0.39	0.21 - 0.54	0.27 - 0.52	0.00122172
ILMN_1662463	COMMD5	8	8.42115e+07	0.422	0.23 - 0.58	0.29 - 0.56	0.00122172
ILMN_1846517	LOC100505715	19	4.44052e+07	0.419	0.23 - 0.58	0.27 - 0.56	0.00122469
ILMN_2054607	CYP4V2	4	33867375	0.422	0.23 - 0.58	0.28 - 0.60	0.00122898
ILMN_2387636	EIF6	20	1.87134e+08	0.433	0.23 - 0.60	0.27 - 0.59	0.00122898
ILMN_1777233	E2F2	1	2.3833e+07	0.409	0.22 - 0.57	0.28 - 0.55	0.00122996
ILMN_1735910	VMO1	17	4.24079e+07	0.421	0.22 - 0.58	0.28 - 0.55	0.00123169
ILMN_1807304	MBNL1	3	1.52183e+08	0.421	0.22 - 0.58	0.25 - 0.58	0.00123169
ILMN_1677385	C8orf40	8	4.68878e+06	0.431	0.23 - 0.59	0.31 - 0.56	0.00123169
ILMN_1696975	USP1	1	6.29172e+07	0.426	0.23 - 0.59	0.28 - 0.58	0.0012358
ILMN_1654735	SLCO3A1	15	9.27061e+07	0.437	0.23 - 0.60	0.28 - 0.60	0.00123599
ILMN_1815086	NINJ1	9	9.58839e+07	0.475	0.26 - 0.64	0.30 - 0.62	0.00124243
ILMN_1680223	PNPLA8	7	4.50234e+06	0.386	0.20 - 0.54	0.25 - 0.55	0.00124287
ILMN_1852022	PLIN4	19	1.08113e+08	0.429	0.23 - 0.59	0.28 - 0.57	0.00124287
ILMN_1663538	CLYBL	13	1.00545e+08	0.412	0.22 - 0.57	0.27 - 0.55	0.00126155
ILMN_1794780	SHARPIN	8	1.45154e+08	0.405	0.21 - 0.56	0.27 - 0.52	0.00126536
ILMN_1806937	BABAM1	19	1.73899e+07	0.402	0.21 - 0.56	0.24 - 0.53	0.00126838
ILMN_3247424	ADAP1	7	6.43207e+07	0.4	0.21 - 0.56	0.25 - 0.55	0.00127057
ILMN_1679268	PELI1	2	937780	0.408	0.22 - 0.56	0.28 - 0.55	0.00127057
ILMN_1653828	CHFR	12	1.33417e+08	0.406	0.22 - 0.56	0.26 - 0.54	0.0012789
ILMN_1793770	DNAJB6	7	1.5721e+08	0.402	0.21 - 0.56	0.26 - 0.53	0.00128133
ILMN_1692295	MYO1G	7	4.50025e+07	0.415	0.22 - 0.57	0.28 - 0.54	0.00128158
ILMN_1791847	DAPK2	15	6.41996e+07	0.404	0.21 - 0.56	0.27 - 0.55	0.00129572
ILMN_1813746	CORO2A	9	1.00887e+08	0.44	0.23 - 0.61	0.30 - 0.56	0.00129778
ILMN_1797191	KIAA0040	1	1.75126e+08	0.436	0.23 - 0.60	0.29 - 0.58	0.00129802
ILMN_1759030	MAP4K5	14	5.08853e+07	0.401	0.21 - 0.56	0.25 - 0.56	0.00130624
ILMN_1688622	UBQLN1	9	8.62751e+07	0.409	0.22 - 0.57	0.26 - 0.55	0.00131028
ILMN_1724194	NPEPL1	20	5.72908e+07	0.403	0.22 - 0.56	0.30 - 0.52	0.00131168
ILMN_1656371	TRPA1	8	7.29339e+07	0.415	0.22 - 0.57	0.29 - 0.53	0.00131702
ILMN_1671809	DUSP22	6	351080	0.401	0.21 - 0.56	0.26 - 0.59	0.00132512
ILMN_1880425	AK095358	13	5.23405e+07	0.403	0.21 - 0.56	0.25 - 0.58	0.00132764
ILMN_1684943	TRAT1	3	1.08573e+08	0.433	0.23 - 0.60	0.27 - 0.59	0.00133205
ILMN_1732053	SNRNP70	19	4.96118e+07	0.394	0.21 - 0.55	0.27 - 0.52	0.00133447
ILMN_1713402	FAM160A2	11	8.89028e+07	0.39	0.20 - 0.55	0.24 - 0.53	0.00133644
ILMN_2374449	SPP1	4	6.23282e+06	0.418	0.22 - 0.58	0.27 - 0.59	0.00133644
ILMN_1709307	GPSM1	9	1.39254e+08	0.43	0.23 - 0.59	0.28 - 0.58	0.00133678
ILMN_1801119	BCL2	18	6.07912e+07	0.415	0.22 - 0.58	0.27 - 0.58	0.00134095
ILMN_1733390	LARP1B	4	1.2903e+08	0.408	0.21 - 0.57	0.24 - 0.58	0.00134698
ILMN_1794470	ANKFY1	17	4.24303e+07	0.393	0.21 - 0.55	0.23 - 0.53	0.00134879
ILMN_2123743	FCER1G	1	1.61189e+08	0.401	0.21 - 0.56	0.26 - 0.54	0.00134879
ILMN_1811702	GRN	17	4.06739e+06	0.43	0.23 - 0.60	0.30 - 0.59	0.00134879
ILMN_1760718	ZMIZ2	7	4.48093e+07	0.415	0.22 - 0.57	0.29 - 0.54	0.00135017
ILMN_1677376	CHD7	8	5.99554e+07	0.415	0.22 - 0.58	0.26 - 0.57	0.00135388
ILMN_1676895	BTNL8	5	1.80339e+08	0.427	0.23 - 0.59	0.27 - 0.63	0.00135388
ILMN_1770803	BNIP2	15	6.17791e+07	0.433	0.23 - 0.60	0.30 - 0.57	0.00135388
ILMN_1683305	COMMD2	3	1.07762e+08	0.424	0.22 - 0.59	0.29 - 0.58	0.00135467
ILMN_1771333	CD47	3	1.49459e+08	0.452	0.24 - 0.62	0.29 - 0.60	0.00135467
ILMN_1789627	GP1BB	22	1.97123e+07	0.431	0.23 - 0.60	0.28 - 0.59	0.00135798
ILMN_1701613	RARRES3	11	6.33137e+07	0.482	0.25 - 0.66	0.32 - 0.63	0.00135856
ILMN_1700604	RBM14	11	6.63947e+07	0.385	0.20 - 0.54	0.23 - 0.51	0.00135965
ILMN_2313730	RHOC	1	1.13244e+08	0.481	0.25 - 0.66	0.29 - 0.63	0.00135971
ILMN_1798602	PCF11	11	8.28964e+07	0.419	0.22 - 0.58	0.25 - 0.58	0.00136108
ILMN_3244607	FAM117B	2	2.03634e+08	0.427	0.23 - 0.59	0.28 - 0.60	0.0013689
ILMN_2063114	TAF1D	11	9.34693e+07	0.406	0.21 - 0.57	0.25 - 0.53	0.00136902
ILMN_1669550	MAD2L2	1	4.8674e+07	0.402	0.21 - 0.56	0.24 - 0.54	0.00137044
ILMN_1691290	CELSR3	3	1.17347e+07	0.426	0.22 - 0.59	0.28 - 0.59	0.00137044
ILMN_1714165	ST3GAL2	16	7.04154e+07	0.411	0.22 - 0.57	0.28 - 0.54	0.00137455
ILMN_1798212	LLGL1	17	1.8148e+07	0.417	0.22 - 0.57	0.25 - 0.59	0.00137656
ILMN_1721035	MS4A6A	11	2.49105e+08	0.403	0.21 - 0.56	0.28 - 0.54	0.00137772
ILMN_1694539	MAP3K6	1	2.10614e+07	0.415	0.22 - 0.57	0.28 - 0.55	0.00137772
ILMN_2404135	RIOK3	18	2.76818e+07	0.428	0.23 - 0.59	0.27 - 0.58	0.00137772
ILMN_1665384	SH3BP5L	1	5.99406e+07	0.431	0.23 - 0.59	0.28 - 0.60	0.00137772
ILMN_2260500	KIAA0319L	1	3.59049e+07	0.401	0.21 - 0.56	0.27 - 0.54	0.00137784
ILMN_1794740	CD151	11	838512	0.414	0.22 - 0.57	0.28 - 0.57	0.00137958
ILMN_2115005	FGD2	6	3.69968e+07	0.424	0.23 - 0.58	0.29 - 0.56	0.00138164
ILMN_1709233	F5	1	1.69488e+08	0.419	0.22 - 0.58	0.28 - 0.57	0.0013858
ILMN_3241953	A2LD1	13	1.01184e+08	0.442	0.23 - 0.61	0.28 - 0.58	0.0013866
ILMN_2406410	RHBDD2	7	7.5518e+07	0.397	0.21 - 0.55	0.27 - 0.52	0.00139126
ILMN_2113362	ARL6IP1	16	1.88034e+07	0.4	0.21 - 0.56	0.25 - 0.55	0.00140165
ILMN_1770667	HECA	6	5.18203e+07	0.403	0.21 - 0.56	0.27 - 0.53	0.0014067
ILMN_1665357	EPS15	1	1.39502e+08	0.426	0.22 - 0.59	0.29 - 0.56	0.0014067
ILMN_1668270	ZDHHC18	1	3.31439e+06	0.425	0.22 - 0.59	0.28 - 0.58	0.0014069
ILMN_1671191	UQCRC1	3	4.86375e+07	0.427	0.22 - 0.59	0.26 - 0.59	0.0014069
ILMN_1659782	STK19	6	2.71819e+07	0.43	0.23 - 0.59	0.27 - 0.57	0.0014069
ILMN_2338197	LINS	15	2.08395e+08	0.397	0.21 - 0.56	0.26 - 0.52	0.00140789
ILMN_1715214	PTPN7	1	2.02116e+08	0.412	0.22 - 0.57	0.29 - 0.56	0.00140789
ILMN_1907834	AK025332	1	1.0111e+08	0.437	0.23 - 0.60	0.29 - 0.58	0.00140789
ILMN_1771593	RRM1	11	4.1597e+06	0.397	0.21 - 0.55	0.27 - 0.52	0.00140956
ILMN_1716838	C21orf56	21	4.75815e+07	0.425	0.22 - 0.59	0.30 - 0.56	0.00141431
ILMN_1785175	SWAP70	11	9.77313e+06	0.43	0.23 - 0.59	0.28 - 0.60	0.00141634
ILMN_2282641	TBXAS1	7	1.39718e+08	0.428	0.23 - 0.59	0.29 - 0.57	0.00141639
ILMN_2181125	NAPB	20	2.33554e+07	0.409	0.22 - 0.57	0.26 - 0.55	0.00142133
ILMN_1767573	CRLF2	X	1.78972e+07	0.4	0.21 - 0.56	0.29 - 0.51	0.00142614
ILMN_1802669	PPP3CB	10	7.51967e+07	0.427	0.22 - 0.59	0.27 - 0.58	0.0014276
ILMN_2105966	SLC35A4	5	1.17291e+08	0.404	0.21 - 0.56	0.23 - 0.56	0.00142854
ILMN_1696375	TTC31	2	7.47214e+07	0.416	0.22 - 0.57	0.26 - 0.55	0.00142854
ILMN_1738093	RNFT2	12	1.39948e+08	0.433	0.23 - 0.60	0.27 - 0.57	0.00142854
ILMN_1756541	MXD4	4	2.24921e+06	0.401	0.21 - 0.56	0.26 - 0.53	0.00142868
ILMN_1810785	RNF11	1	5.17374e+07	0.435	0.23 - 0.60	0.28 - 0.59	0.00143285
ILMN_2379520	HAGH	16	1.86916e+06	0.398	0.21 - 0.55	0.26 - 0.53	0.0014333
ILMN_1672662	SLC20A1	2	1.13421e+08	0.402	0.21 - 0.56	0.27 - 0.53	0.00143503
ILMN_2394381	CLN3	16	2.84888e+07	0.416	0.22 - 0.57	0.27 - 0.58	0.00143629
ILMN_1809437	RHBDD2	7	7.5518e+07	0.396	0.21 - 0.55	0.27 - 0.52	0.00143919
ILMN_1752150	LOC100129408	18	5.53266e+07	0.404	0.21 - 0.56	0.29 - 0.52	0.00144371
ILMN_1773643	SLC38A9	5	5.49219e+07	0.395	0.21 - 0.55	0.26 - 0.55	0.00145184
ILMN_1883997	BX105747	6	3.1451e+07	0.404	0.21 - 0.57	0.26 - 0.55	0.00145261
ILMN_1756572	COQ2	4	1.04382e+08	0.39	0.20 - 0.55	0.28 - 0.51	0.00145704
ILMN_2256765	CDC16	13	1.15038e+08	0.395	0.20 - 0.56	0.27 - 0.53	0.00145704
ILMN_1777096	TDG	12	8.41852e+07	0.442	0.23 - 0.61	0.29 - 0.60	0.00145704
ILMN_1814650	TRAPPC4	11	3.6655e+07	0.411	0.22 - 0.57	0.29 - 0.52	0.00145806
ILMN_1784602	CDKN1A	6	1.18894e+08	0.423	0.22 - 0.59	0.26 - 0.60	0.00145806
ILMN_1681679	TSPO	22	1.35212e+08	0.422	0.22 - 0.58	0.28 - 0.58	0.00145987
ILMN_3238058	LOC151162	2	4.35592e+07	0.427	0.22 - 0.59	0.31 - 0.53	0.00145987
ILMN_1723962	LXN	3	2.58951e+07	0.404	0.21 - 0.56	0.27 - 0.53	0.00146396
ILMN_1809040	LDLRAP1	1	1.58385e+08	0.422	0.22 - 0.58	0.27 - 0.60	0.00146396
ILMN_1669484	WDR6	3	4.90532e+07	0.44	0.23 - 0.61	0.27 - 0.59	0.00147083
ILMN_1745787	POLL	10	1.03339e+08	0.388	0.20 - 0.54	0.23 - 0.53	0.00147203
ILMN_2213136	LEF1	4	7.01949e+07	0.414	0.22 - 0.58	0.28 - 0.54	0.00147838
ILMN_1745778	SLC45A4	8	1.42217e+08	0.418	0.22 - 0.58	0.25 - 0.59	0.00147838
ILMN_1667034	PDPR	16	108969090	0.433	0.23 - 0.59	0.27 - 0.59	0.00147838
ILMN_1745784	ZNF324	19	6.20174e+07	0.423	0.22 - 0.58	0.27 - 0.56	0.00147879
ILMN_1780898	PRKCH	14	5.89845e+07	0.43	0.23 - 0.59	0.30 - 0.57	0.00147879
ILMN_1727361	LEMD3	12	91691435	0.417	0.22 - 0.58	0.28 - 0.56	0.00148415
ILMN_1721106	C14orf159	14	6.56416e+07	0.461	0.24 - 0.63	0.30 - 0.60	0.00148415
ILMN_2400922	OPRL1	20	4.93304e+07	0.429	0.23 - 0.59	0.29 - 0.59	0.0014872
ILMN_3216336	TPT1	6	1.44522e+08	0.438	0.23 - 0.60	0.27 - 0.62	0.0014872
ILMN_1682938	ARF3	12	6.27319e+07	0.439	0.23 - 0.60	0.29 - 0.59	0.0014872
ILMN_1772888	AX746718	17	5.85115e+07	0.421	0.22 - 0.58	0.28 - 0.54	0.00149622
ILMN_1721978	CARD11	7	2.94583e+06	0.4	0.21 - 0.56	0.27 - 0.51	0.00150172
ILMN_1720595	MDGA1	6	3.76004e+07	0.418	0.22 - 0.58	0.27 - 0.55	0.00150585
ILMN_2309446	RBBP6	16	2.45521e+07	0.381	0.20 - 0.54	0.23 - 0.51	0.00150592
ILMN_1651788	MAP3K11	11	6.53654e+07	0.417	0.22 - 0.58	0.27 - 0.57	0.00150827
ILMN_2234970	SLC39A3	19	2.73258e+06	0.399	0.21 - 0.56	0.26 - 0.57	0.00150976
ILMN_1706959	TIMM22	17	905292	0.399	0.21 - 0.56	0.26 - 0.56	0.00151587
ILMN_1765060	FBXO34	14	5.58199e+07	0.386	0.20 - 0.54	0.25 - 0.53	0.00151749
ILMN_1712560	SF1	11	1.24091e+08	0.397	0.21 - 0.56	0.25 - 0.55	0.0015231
ILMN_1801043	GSN	9	6.45331e+07	0.408	0.21 - 0.57	0.27 - 0.55	0.0015231
ILMN_1781479	SUV39H1	X	4.85673e+07	0.407	0.21 - 0.57	0.24 - 0.58	0.00152312
ILMN_1782069	TRAK1	3	4.22539e+07	0.38	0.20 - 0.54	0.26 - 0.50	0.00152333
ILMN_1725528	LOC400657	18	7.22604e+07	0.412	0.22 - 0.57	0.27 - 0.56	0.00152338
ILMN_2340259	PDE4B	1	6.68398e+07	0.398	0.21 - 0.56	0.26 - 0.58	0.00152598
ILMN_1697777	TSTA3	8	1.44695e+08	0.403	0.21 - 0.56	0.28 - 0.54	0.00153068
ILMN_1708248	LILRB1	19	5.51484e+07	0.421	0.22 - 0.58	0.27 - 0.56	0.00153691
ILMN_1658885	DAGLB	7	6.44879e+06	0.418	0.22 - 0.58	0.26 - 0.58	0.00154245
ILMN_1811470	PLEK2	14	6.78541e+07	0.419	0.22 - 0.58	0.28 - 0.57	0.00154812
ILMN_2228180	MSRA	8	1.02862e+07	0.454	0.24 - 0.63	0.28 - 0.62	0.0015536
ILMN_2048591	LRRN3	7	1.10765e+08	0.423	0.22 - 0.59	0.25 - 0.57	0.00156139
ILMN_1865736	LOC729451	14	5.51505e+07	0.423	0.22 - 0.59	0.29 - 0.54	0.0015631
ILMN_2125374	CMAS	12	2.22182e+07	0.406	0.21 - 0.57	0.26 - 0.54	0.00156405
ILMN_1705247	ACSL5	10	2.2563e+08	0.404	0.21 - 0.56	0.26 - 0.54	0.00156549
ILMN_1702301	DOCK10	2	1.14188e+08	0.467	0.25 - 0.64	0.32 - 0.61	0.00156549
ILMN_1809522	NACC2	9	5.48997e+06	0.384	0.20 - 0.54	0.24 - 0.53	0.00156598
ILMN_2243912	RAB37	17	1.43711e+08	0.408	0.21 - 0.57	0.25 - 0.57	0.00156598
ILMN_1797372	C3orf58	3	7.27427e+07	0.415	0.22 - 0.58	0.27 - 0.55	0.00156598
ILMN_1772658	KIAA0947	5	1.38903e+08	0.415	0.22 - 0.58	0.30 - 0.54	0.00156598
ILMN_1682783	dJ1198O21.1	22	1.7582e+08	0.381	0.20 - 0.53	0.25 - 0.52	0.00156685
ILMN_1674609	CLTB	5	3.13748e+07	0.437	0.23 - 0.60	0.26 - 0.63	0.00156685
ILMN_2128668	FOXJ3	1	4.26424e+07	0.393	0.20 - 0.55	0.26 - 0.52	0.00156921
ILMN_1811373	FAM20B	1	1.79045e+08	0.404	0.21 - 0.57	0.27 - 0.53	0.00157386
ILMN_1655225	C19orf25	19	1.05186e+08	0.394	0.21 - 0.55	0.27 - 0.55	0.00157485
ILMN_2393450	INF2	14	1.47337e+06	0.429	0.22 - 0.59	0.26 - 0.57	0.00157485
ILMN_1733259	ADORA3	1	1.57335e+07	0.386	0.20 - 0.54	0.24 - 0.51	0.00157674
ILMN_1770161	BST1	4	1.12026e+08	0.4	0.21 - 0.56	0.25 - 0.54	0.00157674
ILMN_1806456	C14orf45	14	7.45323e+07	0.436	0.23 - 0.60	0.28 - 0.57	0.00158001
ILMN_1758811	IMPA1	8	8.25705e+07	0.412	0.22 - 0.57	0.28 - 0.56	0.0015864
ILMN_3297126	TYMP	22	5.09656e+07	0.402	0.21 - 0.56	0.26 - 0.55	0.00158751
ILMN_1696380	GHRL	3	1.03284e+07	0.393	0.21 - 0.55	0.25 - 0.53	0.00159006
ILMN_1659054	CHKB	22	51018799	0.405	0.21 - 0.57	0.23 - 0.56	0.00159664
ILMN_1765132	LACTB	15	3.36412e+07	0.383	0.20 - 0.54	0.25 - 0.49	0.00159665
ILMN_1766000	PM20D2	6	8.98748e+07	0.412	0.21 - 0.57	0.23 - 0.54	0.00159665
ILMN_1712386	MIS18A	21	6.34218e+07	0.413	0.22 - 0.57	0.28 - 0.56	0.00159665
ILMN_2260082	NAIP	5	1.50709e+07	0.394	0.20 - 0.55	0.25 - 0.58	0.00159843
ILMN_2375484	CPEB2	4	7.03084e+07	0.399	0.21 - 0.56	0.27 - 0.53	0.00159843
ILMN_1805148	C2orf63	2	5.54029e+07	0.38	0.19 - 0.54	0.25 - 0.51	0.00159864
ILMN_1766094	MOSPD2	X	1.49388e+07	0.441	0.23 - 0.61	0.27 - 0.58	0.00159904
ILMN_2099528	BTLA	3	1.12185e+08	0.403	0.21 - 0.56	0.23 - 0.55	0.00160054
ILMN_1755502	USP2	11	1.19235e+08	0.398	0.21 - 0.56	0.27 - 0.57	0.00160144
ILMN_1751941	TMEM106A	17	1.38856e+08	0.4	0.21 - 0.56	0.28 - 0.53	0.00160147
ILMN_2145116	TMEM173	5	4.13719e+07	0.401	0.21 - 0.56	0.25 - 0.53	0.00160147
ILMN_1701006	HEXIM2	17	4.32473e+07	0.398	0.21 - 0.56	0.26 - 0.54	0.00161391
ILMN_1809951	ZNF200	16	3.27272e+06	0.411	0.21 - 0.57	0.28 - 0.53	0.00161666
ILMN_1813682	MRPL53	2	7.46993e+07	0.394	0.20 - 0.55	0.27 - 0.53	0.00161786
ILMN_1771019	MTMR4	17	3.36642e+07	0.391	0.20 - 0.55	0.26 - 0.54	0.00162439
ILMN_1815500	ITPR3	6	5.65672e+07	0.419	0.22 - 0.58	0.28 - 0.56	0.00162439
ILMN_1677487	ANKZF1	2	2.20101e+08	0.419	0.22 - 0.58	0.28 - 0.56	0.00162544
ILMN_1699711	DEDD	1	1.61091e+08	0.392	0.20 - 0.55	0.27 - 0.51	0.00162594
ILMN_2352563	CLDND1	3	9.82346e+07	0.414	0.21 - 0.58	0.27 - 0.58	0.00162756
ILMN_1689119	UNK	17	7.38217e+07	0.402	0.21 - 0.56	0.27 - 0.52	0.00163785
ILMN_1759341	MAN2B1	19	1.27583e+07	0.444	0.23 - 0.61	0.28 - 0.61	0.0016393
ILMN_1661646	BANK1	4	1.02995e+08	0.403	0.21 - 0.56	0.24 - 0.56	0.0016419
ILMN_1676844	NR1D2	3	2.40213e+07	0.402	0.21 - 0.56	0.26 - 0.55	0.00164288
ILMN_1680134	CARM1	19	1.10333e+07	0.401	0.21 - 0.56	0.26 - 0.54	0.00164793
ILMN_2261076	NEDD9	6	1.11837e+07	0.39	0.20 - 0.55	0.24 - 0.57	0.0016491
ILMN_1809027	ATP5SL	19	4.19375e+07	0.402	0.21 - 0.56	0.27 - 0.53	0.00165629
ILMN_2309245	BIN1	2	1.27806e+08	0.405	0.21 - 0.57	0.24 - 0.57	0.00165894
ILMN_1735151	EIF5A2	3	1.70607e+08	0.395	0.20 - 0.55	0.25 - 0.53	0.00166237
ILMN_1688373	LST1	6	7.02864e+07	0.409	0.21 - 0.57	0.28 - 0.54	0.001663
ILMN_1662364	AARS	16	2.93616e+06	0.41	0.21 - 0.57	0.26 - 0.55	0.001663
ILMN_1660436	HSPA1A	6	7.96237e+06	0.412	0.21 - 0.58	0.25 - 0.61	0.00166429
ILMN_1702759	TMX4	20	3.17977e+07	0.45	0.23 - 0.62	0.27 - 0.59	0.00166429
ILMN_1799062	NFKB2	10	9.50344e+07	0.407	0.21 - 0.56	0.27 - 0.53	0.0016729
ILMN_2354381	PON2	7	104161913	0.436	0.23 - 0.60	0.29 - 0.60	0.0016729
ILMN_2128750	PTTG1IP	21	4.62697e+07	0.42	0.22 - 0.58	0.28 - 0.55	0.00167781
ILMN_1701173	KCNK6	19	3.88191e+07	0.446	0.23 - 0.61	0.30 - 0.59	0.00167851
ILMN_1680390	GCNT2	6	583196	0.395	0.20 - 0.55	0.24 - 0.54	0.00168745
ILMN_1778374	BSG	19	1.06295e+07	0.422	0.22 - 0.59	0.29 - 0.54	0.00168745
ILMN_1751571	RAD23A	19	1.30643e+07	0.396	0.20 - 0.56	0.26 - 0.54	0.00168805
ILMN_2345015	PTGES2	9	2.13314e+07	0.383	0.20 - 0.54	0.25 - 0.52	0.00169046
ILMN_1664466	KLHL9	9	1.30883e+08	0.423	0.22 - 0.59	0.28 - 0.55	0.00169046
ILMN_1675982	GGA3	17	7.32331e+07	0.442	0.23 - 0.61	0.32 - 0.56	0.00169138
ILMN_1748473	GIMAP4	7	1.50271e+08	0.392	0.20 - 0.55	0.27 - 0.51	0.0016919
ILMN_1721081	SP4	7	2.15536e+07	0.417	0.22 - 0.58	0.28 - 0.53	0.00169313
ILMN_1652521	MTMR9	8	1.11855e+07	0.397	0.20 - 0.56	0.26 - 0.54	0.00170028
ILMN_1752899	BCL11A	2	2.35868e+07	0.398	0.21 - 0.56	0.25 - 0.58	0.00170326
ILMN_1779095	CEBPE	14	6.06849e+07	0.436	0.23 - 0.60	0.26 - 0.58	0.00170326
ILMN_1690040	TM7SF2	11	7.21882e+07	0.393	0.20 - 0.56	0.24 - 0.55	0.00171594
ILMN_1726769	CNDP2	18	6.48834e+07	0.402	0.21 - 0.56	0.25 - 0.55	0.00171594
ILMN_1811301	INPP5E	9	1.21862e+08	0.372	0.19 - 0.52	0.23 - 0.55	0.00171959
ILMN_1786039	RNF34	12	1.39323e+08	0.442	0.23 - 0.61	0.31 - 0.57	0.00171959
ILMN_1700733	KIAA1370	15	5.28744e+07	0.409	0.21 - 0.57	0.29 - 0.54	0.00172
ILMN_3247182	FAM179A	2	2.92749e+07	0.434	0.22 - 0.60	0.28 - 0.59	0.00172198
ILMN_1720241	TRIP12	2	2.30632e+08	0.391	0.20 - 0.55	0.24 - 0.54	0.00172323
ILMN_2410965	MRI1	19	1.38848e+07	0.401	0.21 - 0.56	0.25 - 0.53	0.00173396
ILMN_1805823	BANF2	20	6.33545e+07	0.395	0.20 - 0.55	0.27 - 0.52	0.00173408
ILMN_2360710	TPM1	15	1.77057e+07	0.422	0.22 - 0.59	0.27 - 0.55	0.00173408
ILMN_2055523	ChGn	8	1.92621e+07	0.422	0.22 - 0.59	0.24 - 0.61	0.00173788
ILMN_1747650	BMP6	6	7.88148e+06	0.414	0.21 - 0.58	0.26 - 0.55	0.00174374
ILMN_1783120	SLMAP	3	3.46694e+07	0.393	0.20 - 0.55	0.24 - 0.55	0.00174409
ILMN_2230892	IL10RB	21	5.79147e+07	0.422	0.22 - 0.59	0.27 - 0.57	0.00174409
ILMN_2332558	ARL5A	2	1.52658e+08	0.417	0.21 - 0.58	0.27 - 0.57	0.00174585
ILMN_1733874	SH2D2A	1	1.56776e+08	0.4	0.21 - 0.56	0.25 - 0.57	0.00174602
ILMN_1733869	OGDH	7	4.47484e+07	0.41	0.21 - 0.57	0.29 - 0.56	0.0017471
ILMN_2054442	ZNF146	19	3.67295e+07	0.399	0.20 - 0.56	0.26 - 0.55	0.00175036
ILMN_1651557	KDELC2	11	1.08343e+08	0.413	0.21 - 0.58	0.28 - 0.53	0.00175045
ILMN_1774761	CCR2	3	4.6402e+07	0.403	0.21 - 0.57	0.26 - 0.55	0.0017514
ILMN_2376416	UBXN11	1	26609162	0.439	0.23 - 0.61	0.29 - 0.57	0.00175154
ILMN_1738784	PPP2R5A	1	2.12535e+08	0.396	0.20 - 0.56	0.25 - 0.54	0.0017517
ILMN_1801313	SIAH2	3	1.6101e+08	0.423	0.22 - 0.59	0.26 - 0.57	0.00175215
ILMN_2353240	USF1	1	1.50459e+08	0.423	0.22 - 0.59	0.25 - 0.60	0.00175215
ILMN_2073289	MTSS1	8	1.25563e+08	0.416	0.21 - 0.58	0.28 - 0.58	0.00175378
ILMN_1757742	ZRANB1	10	1.26673e+08	0.423	0.22 - 0.59	0.27 - 0.56	0.00176116
ILMN_1734895	SFT2D1	6	1.6674e+08	0.401	0.21 - 0.56	0.28 - 0.53	0.00176546
ILMN_2121207	FAM125A	19	1.99829e+07	0.38	0.20 - 0.53	0.22 - 0.53	0.00177275
ILMN_2399877	COG5	7	1.31506e+08	0.387	0.20 - 0.55	0.24 - 0.53	0.00177275
ILMN_1727709	GPBAR1	2	1.10043e+08	0.412	0.21 - 0.58	0.26 - 0.60	0.00177275
ILMN_3256325	CYB561D1	1	2.19128e+08	0.422	0.22 - 0.59	0.26 - 0.56	0.00177275
ILMN_1905548	MBNL3	X	1.06843e+08	0.429	0.22 - 0.60	0.27 - 0.57	0.00177275
ILMN_1769546	RIN2	20	1.7536e+07	0.431	0.22 - 0.60	0.27 - 0.61	0.00177275
ILMN_2128795	LRIG1	3	6.64295e+07	0.441	0.22 - 0.61	0.28 - 0.59	0.00177612
ILMN_1702120	NDUFAF3	3	4.9058e+07	0.392	0.20 - 0.55	0.27 - 0.50	0.00177695
ILMN_1757406	HIST1H1C	6	2.60561e+07	0.458	0.24 - 0.63	0.29 - 0.60	0.00178318
ILMN_1657011	LOC100289019	9	1.30874e+08	0.38	0.19 - 0.54	0.27 - 0.50	0.0017843
ILMN_1734288	DUSP18	22	3.10583e+07	0.434	0.22 - 0.60	0.27 - 0.60	0.00178467
ILMN_1721575	VPS18	15	4.11959e+07	0.429	0.22 - 0.60	0.28 - 0.58	0.00179146
ILMN_1728742	C5orf4	5	1.54198e+08	0.412	0.21 - 0.58	0.27 - 0.55	0.00179172
ILMN_1752631	CGGBP1	3	8.81016e+07	0.416	0.21 - 0.58	0.25 - 0.58	0.00179225
ILMN_1756715	RUNDC3A	17	4.23949e+07	0.383	0.20 - 0.54	0.23 - 0.53	0.00179254
ILMN_1711823	C17orf70	17	9.06366e+07	0.384	0.20 - 0.54	0.25 - 0.51	0.00179311
ILMN_1758728	FANCG	9	3.5074e+07	0.408	0.21 - 0.57	0.25 - 0.55	0.00179311
ILMN_2058468	BACH2	6	7.9507e+07	0.42	0.22 - 0.58	0.26 - 0.60	0.00179311
ILMN_2353161	MSLN	16	818834	0.387	0.20 - 0.54	0.23 - 0.52	0.00179781
ILMN_2260991	TSPO	22	3.06429e+06	0.378	0.19 - 0.53	0.26 - 0.50	0.00179897
ILMN_1740276	CLDN9	16	4.35553e+07	0.429	0.22 - 0.60	0.24 - 0.59	0.00179897
ILMN_1671509	CCL3	17	34417352	0.423	0.22 - 0.59	0.27 - 0.59	0.00180624
ILMN_1805104	ABAT	16	8.87793e+06	0.422	0.22 - 0.59	0.28 - 0.59	0.00181147
ILMN_1763663	AF086132	16	5.01398e+07	0.384	0.20 - 0.54	0.25 - 0.50	0.00181285
ILMN_3238196	CYTH4	22	3.77111e+07	0.408	0.21 - 0.57	0.28 - 0.53	0.00181582
ILMN_1741253	UBR5	8	1.03266e+08	0.408	0.21 - 0.58	0.25 - 0.55	0.00181692
ILMN_1686981	SULF2	20	4.62882e+07	0.471	0.24 - 0.65	0.29 - 0.62	0.0018219
ILMN_1735453	FAM98A	2	3.38088e+07	0.386	0.20 - 0.55	0.25 - 0.55	0.00182488
ILMN_1775192	BCLAF1	6	1.3658e+08	0.4	0.20 - 0.56	0.25 - 0.54	0.00182981
ILMN_1658624	UBXN6	19	4.44559e+06	0.392	0.20 - 0.55	0.25 - 0.51	0.00184069
ILMN_2362293	FBXO38	5	1.47822e+08	0.38	0.19 - 0.54	0.24 - 0.51	0.00184438
ILMN_1712075	KIAA0353	15	9.96756e+07	0.396	0.20 - 0.56	0.28 - 0.52	0.00185285
ILMN_1763540	PSME4	2	5.40922e+07	0.409	0.21 - 0.57	0.28 - 0.54	0.00185339
ILMN_2134224	ATP13A1	19	1.9756e+07	0.42	0.22 - 0.58	0.28 - 0.54	0.00185778
ILMN_1716728	C6orf64	6	3.9072e+07	0.392	0.20 - 0.55	0.27 - 0.53	0.00185828
ILMN_3240524	MFSD6	2	1.91367e+08	0.393	0.20 - 0.56	0.26 - 0.51	0.00186656
ILMN_1709894	CLPX	15	6.54432e+07	0.389	0.20 - 0.55	0.24 - 0.55	0.00186878
ILMN_1796537	FYB	5	3.91057e+07	0.396	0.20 - 0.56	0.23 - 0.56	0.00187363
ILMN_1711792	GPBP1	5	5.65469e+07	0.398	0.20 - 0.56	0.26 - 0.54	0.00188073
ILMN_1740487	CMTM7	3	2.96452e+07	0.385	0.20 - 0.54	0.25 - 0.50	0.00188346
ILMN_1733579	EVI2A	17	3.2491e+07	0.413	0.21 - 0.58	0.27 - 0.57	0.00188346
ILMN_1800975	PSME3	17	2.68881e+07	0.43	0.22 - 0.60	0.27 - 0.58	0.00188633
ILMN_2408102	TFIP11	22	4.09956e+07	0.447	0.23 - 0.62	0.26 - 0.62	0.00188633
ILMN_2091454	HBM	16	216456	0.4	0.21 - 0.56	0.28 - 0.51	0.00189521
ILMN_3246708	SNORA5C	7	3.12333e+07	0.383	0.20 - 0.54	0.25 - 0.50	0.00189892
ILMN_1662686	USPL1	13	4.51445e+07	0.402	0.21 - 0.56	0.25 - 0.56	0.00189892
ILMN_2115434	RAB32	6	1.0867e+08	0.375	0.19 - 0.53	0.25 - 0.50	0.00189993
ILMN_1688702	PJA2	5	1.46876e+08	0.438	0.22 - 0.61	0.27 - 0.61	0.00189993
ILMN_1711048	ZBTB17	1	1.62687e+07	0.391	0.20 - 0.55	0.26 - 0.54	0.00190006
ILMN_1699737	TRAP1	16	3712000	0.392	0.20 - 0.55	0.25 - 0.55	0.00190195
ILMN_1652749	ERF	19	4.2752e+07	0.418	0.22 - 0.58	0.25 - 0.57	0.00190967
ILMN_1707791	TAZ	X	1.5365e+08	0.412	0.21 - 0.58	0.26 - 0.55	0.00191057
ILMN_1770742	TMEM55B	14	8.98118e+07	0.392	0.20 - 0.55	0.25 - 0.61	0.00191737
ILMN_1766718	LYSMD3	5	2.09264e+07	0.406	0.21 - 0.57	0.25 - 0.56	0.00191737
ILMN_2121816	GPR137B	1	2.36372e+08	0.406	0.21 - 0.57	0.24 - 0.55	0.00191779
ILMN_1777129	CENPT	16	8.97737e+07	0.405	0.21 - 0.57	0.25 - 0.55	0.00192753
ILMN_1693630	C16orf7	16	67862593	0.441	0.23 - 0.61	0.27 - 0.64	0.00192753
ILMN_3241218	ANKIB1	7	9.20304e+07	0.406	0.21 - 0.57	0.26 - 0.54	0.001933
ILMN_1671854	DKFZp666C094	16	2.82158e+06	0.377	0.19 - 0.54	0.23 - 0.52	0.00193396
ILMN_1730940	KLHDC3	6	2.39147e+08	0.416	0.21 - 0.58	0.27 - 0.57	0.00193396
ILMN_1694268	HES6	2	4.2989e+07	0.417	0.21 - 0.58	0.26 - 0.56	0.00193396
ILMN_2377185	TCEB2	16	3.03914e+07	0.43	0.22 - 0.60	0.27 - 0.59	0.00193396
ILMN_1693410	BRI3BP	12	1.25514e+08	0.408	0.21 - 0.57	0.27 - 0.56	0.00193404
ILMN_1651278	SNIP1	1	4.52261e+07	0.383	0.19 - 0.54	0.26 - 0.52	0.0019429
ILMN_1756131	LOC284837	21	3.80024e+07	0.401	0.20 - 0.56	0.26 - 0.55	0.0019429
ILMN_2121437	NCL	2	2.3232e+08	0.391	0.20 - 0.55	0.25 - 0.53	0.00194835
ILMN_2398432	BRMS1	11	6.23674e+07	0.388	0.20 - 0.55	0.25 - 0.51	0.00196315
ILMN_2333107	AES	19	70325868	0.394	0.20 - 0.56	0.25 - 0.56	0.00196315
ILMN_1661359	CXorf65	X	3.05371e+06	0.396	0.20 - 0.56	0.23 - 0.57	0.00196315
ILMN_1794643	ZGPAT	20	6.61049e+07	0.41	0.21 - 0.57	0.28 - 0.55	0.00196315
ILMN_2401057	CANX	5	5.27429e+07	0.416	0.21 - 0.59	0.25 - 0.58	0.00198436
ILMN_1706268	PTGDR	14	1.79159e+08	0.424	0.22 - 0.59	0.29 - 0.56	0.00198436
ILMN_3287244	KIAA2013	1	1.19803e+07	0.401	0.20 - 0.56	0.27 - 0.54	0.00198625
ILMN_1756937	ST8SIA4	5	1.00143e+08	0.411	0.21 - 0.58	0.28 - 0.53	0.00198842
ILMN_1789244	SOX8	16	1.0369e+06	0.402	0.20 - 0.57	0.28 - 0.53	0.00200037
ILMN_3233388	RELL1	4	8.96478e+07	0.406	0.20 - 0.58	0.26 - 0.56	0.00200599
ILMN_1771385	GBP4	1	3.76126e+07	0.438	0.22 - 0.61	0.28 - 0.58	0.00200599
ILMN_2413537	HEMGN	9	3.93728e+07	0.397	0.20 - 0.56	0.25 - 0.54	0.00200695
ILMN_2128428	DAB2	5	1.00693e+08	0.399	0.20 - 0.56	0.23 - 0.55	0.00200695
ILMN_1739558	CRELD1	3	9.98656e+06	0.367	0.19 - 0.52	0.24 - 0.51	0.00200754
ILMN_1772387	TLR2	4	1.54627e+08	0.379	0.19 - 0.54	0.25 - 0.51	0.00201014
ILMN_1766024	PDCD10	3	1.67402e+08	0.4	0.20 - 0.56	0.24 - 0.55	0.0020106
ILMN_2211065	TMEM91	19	1.67759e+08	0.409	0.21 - 0.58	0.26 - 0.57	0.00201195
ILMN_2386008	MPZL1	1	4.189e+07	0.453	0.23 - 0.62	0.29 - 0.61	0.00201195
ILMN_1718565	CDKN1C	11	2.90524e+06	0.428	0.22 - 0.60	0.28 - 0.57	0.00201711
ILMN_1791388	ZNF787	19	7.49698e+07	0.407	0.21 - 0.57	0.27 - 0.55	0.00202025
ILMN_1795228	ZFAND5	9	5.65988e+07	0.413	0.21 - 0.58	0.28 - 0.55	0.00202025
ILMN_3248874	SNORD8	14	2.18655e+07	0.38	0.19 - 0.54	0.23 - 0.56	0.00202383
ILMN_1702691	TNFAIP3	6	1.38204e+08	0.395	0.20 - 0.56	0.28 - 0.53	0.00202484
ILMN_1805271	ABCA11P	4	433976	0.42	0.21 - 0.59	0.27 - 0.56	0.00202599
ILMN_1759155	IFIT1B	10	9.11447e+07	0.424	0.22 - 0.59	0.26 - 0.56	0.00202664
ILMN_2358652	NXF1	11	6.25599e+07	0.394	0.20 - 0.56	0.28 - 0.51	0.00202921
ILMN_2169761	CPNE8	12	3.90463e+07	0.404	0.20 - 0.57	0.26 - 0.55	0.00203016
ILMN_1676548	BZW2	7	1.67459e+07	0.422	0.22 - 0.58	0.28 - 0.56	0.00203166
ILMN_1856609	AW855473	4	1.5338e+08	0.403	0.21 - 0.57	0.26 - 0.54	0.00203177
ILMN_1742332	KCTD12	13	7.74563e+07	0.414	0.21 - 0.58	0.23 - 0.55	0.002035
ILMN_2143314	SPIB	19	5.0932e+07	0.399	0.20 - 0.56	0.26 - 0.52	0.00203936
ILMN_1720024	IL11RA	9	2.2682e+08	0.368	0.19 - 0.52	0.22 - 0.51	0.00204419
ILMN_1700432	ITPKB	1	3.46606e+07	0.402	0.20 - 0.56	0.27 - 0.54	0.00204419
ILMN_1781906	RBM17	10	6.15862e+06	0.412	0.21 - 0.58	0.26 - 0.59	0.00204638
ILMN_1737585	VARS2	6	2.27612e+06	0.409	0.21 - 0.57	0.27 - 0.57	0.00204885
ILMN_2407482	ITPA	20	3.20253e+06	0.393	0.20 - 0.56	0.24 - 0.55	0.00204949
ILMN_3247452	OST4	2	2.62876e+07	0.392	0.20 - 0.56	0.25 - 0.52	0.0020528
ILMN_1682919	PAFAH2	1	27294205	0.424	0.22 - 0.59	0.28 - 0.55	0.0020528
ILMN_3273996	LOC100129148	7	1.39102e+08	0.442	0.23 - 0.61	0.31 - 0.57	0.00205638
ILMN_2062714	PTGDR	14	5.2743e+07	0.435	0.22 - 0.60	0.29 - 0.58	0.00205677
ILMN_1741159	MAP3K8	10	3.07503e+07	0.393	0.20 - 0.55	0.27 - 0.55	0.00207064
ILMN_2372398	ALDH5A1	6	2.45369e+07	0.417	0.21 - 0.58	0.27 - 0.55	0.00207596
ILMN_1677404	RAP2A	13	3.52412e+07	0.422	0.22 - 0.59	0.29 - 0.58	0.00208109
ILMN_1673357	SLA2	20	9.81199e+07	0.423	0.21 - 0.59	0.29 - 0.56	0.00208109
ILMN_1699931	HCST	19	3.63951e+07	0.427	0.22 - 0.60	0.25 - 0.60	0.0020843
ILMN_1765851	TRADD	16	6.71885e+07	0.418	0.21 - 0.59	0.26 - 0.56	0.00209171
ILMN_1670322	FCHO2	5	1.45619e+08	0.38	0.19 - 0.54	0.23 - 0.53	0.00209176
ILMN_1654545	CPSF1	8	7.23861e+07	0.389	0.20 - 0.55	0.26 - 0.51	0.00209176
ILMN_2363058	PAOX	10	1.35205e+08	0.382	0.19 - 0.54	0.24 - 0.52	0.00209415
ILMN_1771800	PRKCA	17	6.48066e+07	0.414	0.21 - 0.58	0.25 - 0.56	0.00210415
ILMN_1665331	AMT	3	4.94543e+07	0.38	0.19 - 0.54	0.22 - 0.53	0.00210671
ILMN_1657478	MAGEL2	15	2.38891e+07	0.38	0.19 - 0.54	0.26 - 0.51	0.0021069
ILMN_1692199	RNF103	2	8.6831e+07	0.392	0.20 - 0.55	0.26 - 0.53	0.00211055
ILMN_1731619	DAD1	14	2.30441e+07	0.37	0.19 - 0.52	0.23 - 0.51	0.00211114
ILMN_1738642	CMPK1	1	4.7844e+07	0.42	0.21 - 0.59	0.28 - 0.55	0.00212852
ILMN_1660629	NBEAL2	3	4.70511e+07	0.426	0.22 - 0.59	0.29 - 0.57	0.00213047
ILMN_1742026	PYHIN1	1	1.58915e+08	0.391	0.20 - 0.55	0.24 - 0.58	0.00214118
ILMN_2085862	SLC15A3	11	6.07047e+07	0.42	0.22 - 0.58	0.27 - 0.56	0.00214247
ILMN_1810228	TTF2	1	1.17645e+08	0.4	0.20 - 0.56	0.25 - 0.54	0.00214384
ILMN_2258816	SAMD3	6	1.30466e+08	0.412	0.21 - 0.58	0.26 - 0.58	0.00214802
ILMN_1667022	PASK	2	242046771	0.407	0.21 - 0.57	0.24 - 0.56	0.00215031
ILMN_1677877	UBE2L3	22	2.19782e+07	0.41	0.21 - 0.57	0.27 - 0.57	0.00216795
ILMN_1911042	PIP4K2A	10	2.2824e+07	0.388	0.19 - 0.55	0.23 - 0.53	0.00216882
ILMN_1724181	IL15	4	1.42654e+08	0.403	0.21 - 0.56	0.26 - 0.55	0.00217221
ILMN_3240222	SGK223	8	1.42497e+08	0.402	0.20 - 0.57	0.26 - 0.56	0.0021734
[truncated: 3,273 more rows]

## Sheet: ST-2
Supplementary Table 2: Chromosome-wise analysis of OATS FDR significant genes (n=4605)
Chromosome	Total genes per chromosome	FDR significant genes	Avg heritability of FDR sig genes	% FDR signigicant genes in the chromosome
1	1951	464	0.3976	23.7827
2	1318	301	0.3786	22.8376
3	1112	267	0.3844	24.0108
4	759	167	0.3889	22.0026
5	857	206	0.3852	24.0373
6	1036	255	0.4037	24.6139
7	922	214	0.3972	23.2104
8	716	157	0.3909	21.9274
9	751	205	0.3914	27.2969
10	768	170	0.3809	22.1354
11	1104	274	0.397	24.8188
12	994	237	0.3973	23.8431
13	373	94	0.3743	25.2011
14	648	158	0.4008	24.3827
15	577	127	0.3847	22.0104
16	814	225	0.4042	27.6413
17	1076	257	0.3983	23.8848
18	295	63	0.4011	21.3559
19	1209	326	0.3961	26.9644
20	528	118	0.418	22.3485
21	240	54	0.4036	22.5
22	441	125	0.4098	28.3447
X, Y & Mito Chr	767	139	0.19	18.1226
Total	19256	4603	0.3935

## Sheet: ST-3
Supplementary Table 3 - Gene length & percentage GC content for the available FDR significant genes in OATS (n=4430)
Ensembl ID	Gene symbol	h2	FDR	Gene length (bp)	Percentage_gene_gc_content
ENSG00000164308	ERAP2	0.870136	2.91312e-22	43717	38.41
ENSG00000124588	NQO2	0.862304	2.54336e-21	40882	47.18
ENSG00000146707	POMZP3	0.810315	5.80874e-18	17275	49.24
ENSG00000103489	XYLT1	0.847735	7.66097e-18	369191	45.89
ENSG00000130656	HBZ	0.782672	3.7372e-17	11775	51.79
ENSG00000002933	TMEM176A	0.81043	4.58183e-17	4715	57.55
ENSG00000134215	VAV3	0.812915	2.44567e-16	394019	37.54
ENSG00000036448	MYOM2	0.791517	4.92089e-16	120506	46.64
ENSG00000133704	IPO8	0.789375	1.29858e-15	66881	35.88
ENSG00000124587	PEX6	0.827781	1.95932e-15	15316	51.99
ENSG00000166839	ANKDD1A	0.798557	1.99673e-15	46789	46.76
ENSG00000100991	TRPC4AP	0.781056	1.99673e-15	90403	42.92
ENSG00000187624	C17orf97	0.780748	2.57616e-15	20737	49.85
ENSG00000168903	BTNL3	0.777767	3.70706e-15	17881	43.19
ENSG00000107796	ACTA2	0.78242	3.88712e-15	56265	40.29
ENSG00000128604	IRF5	0.799287	4.68912e-15	12581	56.44
ENSG00000145730	PAM	0.779985	5.23115e-15	277124	35.92
ENSG00000180767	CHST13	0.821743	6.27566e-15	19136	54.54
ENSG00000177697	CD151	0.770845	7.22492e-15	6944	63.31
ENSG00000235915	LST1	0.764498	7.22492e-15	2785	55.49
ENSG00000189306	RRP7A	0.753537	7.70975e-15	11452	57.5
ENSG00000236884	HLA-DRB1	0.770236	1.26612e-14	34102	40.68
ENSG00000197766	CFD	0.795733	1.35737e-14	3977	66.11
ENSG00000131401	NAPSB	0.776605	1.7393e-14	10971	49.41
ENSG00000160200	CBS	0.779306	3.63417e-14	23752	59.18
ENSG00000189068	VSTM1	0.759597	5.37055e-14	23128	46.34
ENSG00000110906	KCTD10	0.737038	6.18159e-14	28704	47.59
ENSG00000076864	RAP1GAP	0.73698	6.69981e-14	73148	56.63
ENSG00000104714	ERICH1	0.767426	6.80274e-14	123360	51.17
ENSG00000133059	DSTYK	0.781989	1.26149e-13	69197	43.6
ENSG00000188846	RPL14	0.787148	1.5175e-13	11295	44.36
ENSG00000110203	FOLR3	0.789914	1.69537e-13	25023	45.32
ENSG00000169692	AGPAT2	0.733562	1.83811e-13	14314	62.71
ENSG00000197119	SLC25A29	0.7881	5.00698e-13	15431	57.04
ENSG00000087253	LPCAT2	0.729724	5.00698e-13	77594	35.49
ENSG00000145214	DGKQ	0.79961	1.44747e-12	28008	60.54
ENSG00000064886	CHI3L2	0.771337	1.44747e-12	42669	44.64
ENSG00000141560	FN3KRP	0.696847	4.73875e-12	13622	53.21
ENSG00000116729	WLS	0.725965	6.40548e-12	134647	41.57
ENSG00000269893	SNHG8	0.718782	7.64625e-12	6607	39.12
ENSG00000071242	RPS6KA2	0.737761	8.40338e-12	497087	46.48
ENSG00000108946	PRKAR1A	0.708007	8.70066e-12	39539	41.97
ENSG00000136861	CDK5RAP2	0.690146	9.41635e-12	191301	43.21
ENSG00000100079	LGALS2	0.695047	1.1373e-11	12368	50.79
ENSG00000102837	OLFM4	0.726469	1.24392e-11	23244	40.05
ENSG00000172322	CLEC12A	0.744859	1.26561e-11	44378	39.56
ENSG00000165682	CLEC1B	0.708458	1.64851e-11	27782	37.27
ENSG00000140092	FBLN5	0.729142	1.66351e-11	78575	47.21
ENSG00000229314	ORM1	0.700055	2.14637e-11	3419	55.09
ENSG00000116299	KIAA1324	0.740743	2.19219e-11	93102	45.89
ENSG00000079459	FDFT1	0.715561	2.95698e-11	43731	44.37
ENSG00000164047	CAMP	0.690586	3.62548e-11	2144	55.8
ENSG00000196502	SULT1A1	0.770897	5.67597e-11	18429	52.56
ENSG00000088930	XRN2	0.708328	5.95289e-11	86494	37.21
ENSG00000131400	NAPSA	0.68553	6.43965e-11	7353	52.43
ENSG00000134809	TIMM10	0.683486	7.19292e-11	2339	47.99
ENSG00000106565	TMEM176B	0.679728	7.99556e-11	10075	51.68
ENSG00000203875	SNHG5	0.699605	8.23327e-11	28441	40.99
ENSG00000136819	C9orf78	0.700051	8.39233e-11	8573	48.01
ENSG00000173917	HOXB2	0.714457	9.46814e-11	4095	56.71
ENSG00000284690	CD300H	0.753412	1.01294e-10	6642	51.5
ENSG00000236693	HLA-DPB1	0.692972	1.05509e-10	11265	48.05
ENSG00000101307	SIRPB1	0.665651	1.08044e-10	58676	43.93
ENSG00000229474	PATL2	0.679621	1.1489e-10	45584	42.9
ENSG00000129295	LRRC6	0.655617	1.22194e-10	105176	39.1
ENSG00000169397	RNASE3	0.660146	1.45801e-10	949	49.16
ENSG00000151640	DPYSL4	0.68368	2.33231e-10	18811	61.6
ENSG00000124469	CEACAM8	0.662318	2.52967e-10	14812	44.38
ENSG00000105501	SIGLEC5	0.693142	2.80332e-10	33618	44.36
ENSG00000054793	ATP9A	0.684155	3.18723e-10	171876	46.63
ENSG00000131238	PPT1	0.701164	3.34477e-10	26266	44.02
ENSG00000108405	P2RX1	0.685451	3.35406e-10	19884	55.64
ENSG00000110455	ACCS	0.68128	3.44169e-10	18312	49.01
ENSG00000182117	NOP10	0.661162	3.95667e-10	1417	49.58
ENSG00000162711	NLRP3	0.679353	3.97792e-10	32952	46.68
ENSG00000169413	RNASE6	0.695881	4.04039e-10	1199	42.58
ENSG00000154330	PGM5	0.687951	4.52675e-10	202753	40.29
ENSG00000173230	GOLGB1	0.704871	5.01907e-10	86568	38.07
ENSG00000013583	HEBP1	0.696005	5.65112e-10	25395	43.51
ENSG00000121653	MAPK8IP1	0.702823	5.8679e-10	20814	58.04
ENSG00000116698	SMG7	0.717594	5.88196e-10	126030	40.28
ENSG00000135778	NTPCR	0.652459	5.88196e-10	33277	42.72
ENSG00000138744	NAAA	0.646977	6.31389e-10	27353	44.37
ENSG00000144401	METTL21A	0.670662	6.35229e-10	45297	40.9
ENSG00000132383	RPA1	0.643863	7.06636e-10	70380	44.49
ENSG00000148346	LCN2	0.696991	7.56304e-10	4382	60.89
ENSG00000170486	KRT72	0.664526	7.62769e-10	15949	46.6
ENSG00000102978	POLR2C	0.678519	7.98359e-10	9349	47.97
ENSG00000144504	ANKMY1	0.645644	8.08598e-10	89787	49.38
ENSG00000099977	DDT	0.674716	8.9098e-10	8463	53.26
ENSG00000055483	USP36	0.664772	9.28576e-10	54060	50.03
ENSG00000214548	MEG3	0.702155	1.01906e-09	81621	51.68
ENSG00000178764	ZHX2	0.748431	1.16399e-09	192855	46.3
ENSG00000182362	YBEY	0.700254	1.20605e-09	11409	53.09
ENSG00000183386	FHL3	0.658298	1.50081e-09	8836	56.84
ENSG00000186049	KRT73	0.648888	1.64341e-09	10989	52.12
ENSG00000110931	CAMKK2	0.684718	2.02739e-09	60633	50.83
ENSG00000100362	PVALB	0.683018	2.20033e-09	18795	51.49
ENSG00000107798	LIPA	0.687269	2.24086e-09	200988	41.43
ENSG00000101425	BPI	0.643009	2.50705e-09	33355	48.09
ENSG00000075234	TTC38	0.704492	2.63555e-09	26047	54.16
ENSG00000143595	AQP10	0.642986	2.63555e-09	4235	52.64
ENSG00000208009	MIR130A	0.651759	3.14672e-09	88	50.56
ENSG00000164821	DEFA4	0.66591	3.26142e-09	2486	45.15
ENSG00000156110	ADK	0.647016	3.42963e-09	558761	37.43
ENSG00000100300	TSPO	0.636111	3.81446e-09	11695	57.74
ENSG00000167644	C19orf33	0.651184	4.23128e-09	842	65.48
ENSG00000114770	ABCC5	0.632593	4.68134e-09	98005	44.68
ENSG00000161944	ASGR2	0.639357	5.12325e-09	14378	52.26
ENSG00000109272	PF4V1	0.677514	5.36724e-09	1187	49.16
ENSG00000214941	ZSWIM7	0.670919	5.65397e-09	23157	44.09
ENSG00000184292	TACSTD2	0.681264	5.94692e-09	1819	58.19
ENSG00000198178	CLEC4C	0.604547	5.98916e-09	22190	45.19
ENSG00000250510	GPR162	0.658776	6.95941e-09	8348	61.54
ENSG00000135919	SERPINE2	0.645888	7.39989e-09	64273	43.2
ENSG00000185811	IKZF1	0.619722	7.46251e-09	101033	43.45
ENSG00000163736	PPBP	0.611725	8.03091e-09	1751	38.3
ENSG00000166086	JAM3	0.666915	8.36403e-09	82930	41.93
ENSG00000002822	MAD1L1	0.642915	8.42308e-09	417450	55.65
ENSG00000100994	PYGB	0.614094	8.65952e-09	49927	52.16
ENSG00000173801	JUP	0.641163	8.83583e-09	32327	54.96
ENSG00000166847	DCTN5	0.639751	1.01533e-08	36006	42.88
ENSG00000121716	PILRB	0.641998	1.06815e-08	15557	53.3
ENSG00000137267	TUBB2A	0.688055	1.17553e-08	3878	56.17
ENSG00000182378	PLCXD1	0.638843	1.17748e-08	27034	53.82
ENSG00000072952	MRVI1	0.627889	1.17748e-08	120897	45.65
ENSG00000101558	VAPA	0.656116	1.19987e-08	46005	37.12
ENSG00000170909	OSCAR	0.619812	1.41869e-08	8024	53.07
ENSG00000134827	TCN1	0.662749	1.43216e-08	13689	39.57
ENSG00000171729	TMEM51	0.657665	1.55207e-08	67946	48.41
ENSG00000138801	PAPSS1	0.680711	1.6984e-08	129958	38.55
ENSG00000225987	PBX2	0.607074	1.7054e-08	5450	55
ENSG00000089127	OAS1	0.640751	1.8118e-08	26439	43.34
ENSG00000170906	NDUFA3	0.606802	2.13952e-08	6529	54.99
ENSG00000071246	VASH1	0.657325	2.15762e-08	21547	55.57
ENSG00000090382	LYZ	0.606573	2.24536e-08	5853	36.54
ENSG00000127946	HIP1	0.652588	2.25454e-08	205664	48.34
ENSG00000147421	HMBOX1	0.628254	2.25819e-08	174369	37.72
ENSG00000124570	SERPINB6	0.678509	2.34681e-08	24006	47.23
ENSG00000099940	SNAP29	0.635185	2.38666e-08	32207	48.84
ENSG00000255198	SNHG9	0.571848	2.38666e-08	550	66.42
ENSG00000122188	LAX1	0.611315	2.67819e-08	11195	46.2
ENSG00000067840	PDZD4	0.663003	2.70957e-08	28399	56.35
ENSG00000100116	GCAT	0.678315	3.20493e-08	9271	54.21
ENSG00000158825	CDA	0.670315	3.42866e-08	29817	48.46
ENSG00000115523	GNLY	0.624749	3.79366e-08	13677	45.87
ENSG00000140400	MAN2C1	0.621998	3.85374e-08	13405	57.22
ENSG00000166888	STAT6	0.641149	3.8706e-08	36731	50.56
ENSG00000131634	TMEM204	0.646868	3.935e-08	26892	58.04
ENSG00000130703	OSBPL2	0.626176	4.05876e-08	64291	52.75
ENSG00000152601	MBNL1	0.627696	4.47062e-08	221952	35.71
ENSG00000127920	GNG11	0.614146	4.47062e-08	6875	38.37
ENSG00000170448	NFXL1	0.613212	4.47062e-08	67434	35.55
ENSG00000178297	TMPRSS9	0.591175	4.47062e-08	66001	52.45
ENSG00000169371	SNUPN	0.606298	4.59484e-08	28386	47.36
ENSG00000134086	VHL	0.587005	6.02225e-08	11889	47.17
ENSG00000132359	RAP1GAP2	0.635891	6.07678e-08	282036	51.49
ENSG00000167768	KRT1	0.589761	6.07678e-08	5671	47.13
ENSG00000183844	FAM3B	0.614161	6.46762e-08	53515	44.37
ENSG00000029725	RABEP1	0.592397	6.62004e-08	104075	41.34
ENSG00000135929	CYP27A1	0.670079	6.96367e-08	33544	43.71
ENSG00000178695	KCTD12	0.623736	6.96367e-08	6230	43.65
ENSG00000086232	EIF2AK1	0.650711	7.07557e-08	36928	44.67
ENSG00000198848	CES1	0.605672	7.40284e-08	30486	47.97
ENSG00000136250	AOAH	0.607735	7.56773e-08	211608	41.56
ENSG00000088832	FKBP1A	0.589733	7.77518e-08	24194	45.47
ENSG00000251381	LINC00958	0.588543	7.77518e-08	28056	43.59
ENSG00000179914	ITLN1	0.598242	8.25242e-08	8640	47.47
ENSG00000100376	FAM118A	0.649699	8.34134e-08	32987	49.58
ENSG00000163993	S100P	0.591419	8.95625e-08	3292	53.54
ENSG00000178719	GRINA	0.6172	9.19774e-08	3359	66.67
ENSG00000105443	CYTH2	0.590224	1.00046e-07	13106	58.18
ENSG00000100448	CTSG	0.584882	1.15945e-07	2732	53.71
ENSG00000176083	ZNF683	0.592329	1.26367e-07	12888	52.46
ENSG00000107902	LHPP	0.601291	1.37636e-07	156065	53.49
ENSG00000107521	HPS1	0.576801	1.44209e-07	30749	49.72
ENSG00000114742	WDR48	0.594618	1.45315e-07	44658	39.95
ENSG00000095787	WAC	0.603038	1.46186e-07	90619	37.79
ENSG00000105499	PLA2G4C	0.580024	1.54728e-07	62974	47.68
ENSG00000144115	THNSL2	0.606235	1.74343e-07	16362	48.07
ENSG00000170293	CMTM8	0.613176	1.90933e-07	131642	43.06
ENSG00000130363	RSPH3	0.625252	1.94776e-07	27331	39.78
ENSG00000120008	WDR11	0.611678	2.09843e-07	58219	36.77
ENSG00000167207	NOD2	0.655275	2.30549e-07	40453	48.07
ENSG00000115073	ACTR1B	0.563231	2.35908e-07	8105	58.52
ENSG00000107317	PTGDS	0.65316	2.46293e-07	6650	66.35
ENSG00000111144	LTA4H	0.592641	2.67205e-07	42767	39.07
ENSG00000164530	PI16	0.569846	2.67806e-07	16574	51.13
ENSG00000172954	LCLAT1	0.600655	2.74388e-07	196999	37.54
ENSG00000085265	FCN1	0.631721	2.89895e-07	14680	50.34
ENSG00000105963	ADAP1	0.573335	2.89895e-07	57507	60.61
ENSG00000257017	HP	0.627765	2.9684e-07	6550	47.67
ENSG00000172262	ZNF131	0.592708	3.01877e-07	126845	44.17
ENSG00000214274	ANG	0.603001	3.59512e-07	14794	43.52
ENSG00000214078	CPNE1	0.596743	3.66544e-07	38925	43.12
ENSG00000159461	AMFR	0.603637	3.99274e-07	64093	42.21
ENSG00000161055	SCGB3A1	0.598647	4.00755e-07	1394	73.26
ENSG00000126246	IGFLR1	0.593033	4.423e-07	3652	57.9
ENSG00000101290	CDS2	0.579921	4.45623e-07	71008	44.8
ENSG00000161905	ALOX15	0.571057	4.59841e-07	11375	54.64
ENSG00000149577	SIDT2	0.596716	4.84719e-07	18709	55.97
ENSG00000104731	KLHDC4	0.615845	5.02229e-07	69507	53.01
ENSG00000069943	PIGB	0.55038	5.27736e-07	36688	39.99
ENSG00000197561	ELANE	0.602751	5.28298e-07	5233	58.58
ENSG00000125898	FAM110A	0.577693	5.41813e-07	23748	51.88
ENSG00000175489	LRRC25	0.600001	5.48501e-07	6485	54.79
ENSG00000254415	SIGLEC14	0.594621	5.50627e-07	4248	54.84
ENSG00000185838	GNB1L	0.606079	5.75526e-07	71716	52.87
ENSG00000113273	ARSB	0.574822	5.75526e-07	208878	41.01
ENSG00000143198	MGST3	0.595549	5.82029e-07	30583	43.33
ENSG00000119185	ITGB1BP1	0.573064	5.82029e-07	20072	45.09
ENSG00000186184	POLR1D	0.601215	6.37758e-07	123495	40.03
ENSG00000198821	CD247	0.610808	6.43675e-07	87970	47.24
ENSG00000140876	NUDT7	0.613998	6.49757e-07	19768	42.76
ENSG00000086548	CEACAM6	0.584448	6.94441e-07	21234	45.91
ENSG00000163564	PYHIN1	0.596632	6.94907e-07	46263	38.94
ENSG00000136279	DBNL	0.583252	7.10944e-07	24816	53.2
ENSG00000116688	MFN2	0.582717	7.59972e-07	33333	51.12
ENSG00000183734	ASCL2	0.660659	7.81477e-07	2457	69.57
ENSG00000187554	TLR5	0.569024	8.38332e-07	33844	46.59
ENSG00000025772	TOMM34	0.568468	8.42274e-07	18267	44.95
ENSG00000183665	TRMT12	0.566451	8.42274e-07	11330	43.63
ENSG00000111837	MAK	0.599633	8.44792e-07	75832	42.11
ENSG00000196526	AFAP1	0.558321	8.54477e-07	181212	46.39
ENSG00000118785	SPP1	0.5965	8.68322e-07	7776	36.31
ENSG00000142208	AKT1	0.57747	8.68322e-07	26402	64.08
ENSG00000109861	CTSC	0.594764	8.82081e-07	44169	38.58
ENSG00000110719	TCIRG1	0.592271	9.34508e-07	11870	63.64
ENSG00000068028	RASSF1	0.591669	9.45196e-07	11198	54.57
ENSG00000110628	SLC22A18	0.615705	9.48517e-07	25525	61.48
ENSG00000159202	UBE2Z	0.545477	1.06208e-06	20649	47.4
ENSG00000172543	CTSW	0.623055	1.09672e-06	3904	59.05
ENSG00000177000	MTHFR	0.572252	1.10945e-06	20732	54.64
ENSG00000010292	NCAPD2	0.56882	1.14561e-06	38599	46.34
ENSG00000140319	SRP14	0.619151	1.16134e-06	3491	43.3
ENSG00000159496	RGL4	0.591099	1.18206e-06	11040	55.37
ENSG00000148341	SH3GLB2	0.578466	1.21863e-06	21267	55.75
ENSG00000034152	MAP2K3	0.646615	1.2884e-06	30560	56.98
ENSG00000144677	CTDSPL	0.583125	1.32317e-06	122589	42.32
ENSG00000118564	FBXL5	0.544127	1.33225e-06	77298	37.86
ENSG00000181029	TRAPPC5	0.565105	1.38644e-06	6870	58.08
ENSG00000231225	MICA	0.556073	1.45545e-06	16455	50.12
ENSG00000130164	LDLR	0.561309	1.4742e-06	44358	51.08
ENSG00000170043	TRAPPC1	0.542665	1.50001e-06	1778	57.62
ENSG00000146833	TRIM4	0.582648	1.62105e-06	42642	43.25
ENSG00000135218	CD36	0.618344	1.62912e-06	309702	36.03
ENSG00000141994	DUS3L	0.547761	1.65078e-06	6393	61.95
ENSG00000166436	TRIM66	0.572392	1.76979e-06	70657	45.38
ENSG00000169592	INO80E	0.542315	1.77422e-06	10078	57
ENSG00000143537	ADAM15	0.595688	1.81508e-06	12209	58.25
ENSG00000005102	MEOX1	0.548464	1.84901e-06	21533	51.6
ENSG00000095303	PTGS1	0.610538	1.90994e-06	25173	50.08
ENSG00000138964	PARVG	0.58999	1.90994e-06	46577	51.78
ENSG00000161036	LRWD1	0.548483	1.94461e-06	8212	61.05
ENSG00000124357	NAGK	0.57058	1.96631e-06	15464	49.56
ENSG00000124203	ZNF831	0.556114	2.02043e-06	135732	45.12
ENSG00000163472	TMEM79	0.54456	2.03109e-06	10250	50.78
ENSG00000133048	CHI3L1	0.571786	2.1149e-06	7773	54.8
ENSG00000063176	SPHK2	0.556461	2.21295e-06	11426	56.78
ENSG00000005075	POLR2J	0.544194	2.31176e-06	5789	55.04
ENSG00000124102	PI3	0.543088	2.41345e-06	1642	51.43
ENSG00000148356	LRSAM1	0.536861	2.45602e-06	52015	51.44
ENSG00000008517	IL32	0.551335	2.49863e-06	16895	53.36
ENSG00000198690	FAN1	0.550637	2.50331e-06	52549	42.81
ENSG00000235863	B3GALT4	0.547135	2.52612e-06	7709	55.75
ENSG00000163221	S100A12	0.529769	2.52612e-06	1910	49.61
ENSG00000186716	BCR	0.59057	2.7956e-06	138333	53.07
ENSG00000160209	PDXK	0.579475	2.88038e-06	43213	57.26
ENSG00000107263	RAPGEF1	0.542163	2.90239e-06	163304	48.49
ENSG00000064687	ABCA7	0.562261	2.94179e-06	25575	60.53
ENSG00000055950	MRPL43	0.570957	2.95583e-06	18057	53.18
ENSG00000196839	ADA	0.591499	2.97578e-06	32711	53.46
ENSG00000237889	DDX39B	0.530329	3.21521e-06	8965	46.65
ENSG00000139187	KLRG1	0.539802	3.25176e-06	60716	39.18
ENSG00000160310	PRMT2	0.560328	3.25963e-06	29529	45.21
ENSG00000198478	SH3BGRL2	0.551799	3.35968e-06	72326	38.81
ENSG00000184489	PTP4A3	0.542916	3.38064e-06	40459	62.4
ENSG00000154803	FLCN	0.55148	3.62284e-06	24976	53.29
ENSG00000104835	SARS2	0.545062	3.74682e-06	15497	53.62
ENSG00000172794	RAB37	0.584405	3.91826e-06	76757	49.21
ENSG00000073605	GSDMB	0.562268	3.98929e-06	15259	48.85
ENSG00000064201	TSPAN32	0.537621	4.07228e-06	16207	63.03
ENSG00000249992	TMEM158	0.55596	4.13692e-06	1821	66.85
ENSG00000146426	TIAM2	0.568701	4.16518e-06	425026	43.49
ENSG00000129467	ADCY4	0.567563	4.23568e-06	16744	54.43
ENSG00000173762	CD7	0.542362	4.32097e-06	2740	65.78
ENSG00000153113	CAST	0.542022	4.66501e-06	254328	39.41
ENSG00000100298	APOBEC3H	0.560042	4.71029e-06	6843	53.45
ENSG00000067057	PFKP	0.54434	4.76415e-06	71385	51.45
ENSG00000164010	ERMAP	0.543359	4.77465e-06	27869	43.14
ENSG00000157916	RER1	0.494242	4.79586e-06	13667	53.96
ENSG00000089327	FXYD5	0.561198	4.95701e-06	15151	49.86
ENSG00000168995	SIGLEC7	0.552686	4.98151e-06	11227	48.93
ENSG00000110799	VWF	0.590725	5.16042e-06	175896	46.59
ENSG00000163947	ARHGEF3	0.552798	5.24015e-06	351911	43.62
ENSG00000116874	WARS2	0.519454	5.41696e-06	109455	38.1
ENSG00000072778	ACADVL	0.599803	5.65612e-06	8141	58.51
ENSG00000136997	MYC	0.569192	5.85753e-06	7517	51.53
ENSG00000120708	TGFBI	0.610792	6.01837e-06	34830	48.91
ENSG00000025708	TYMP	0.522617	6.28266e-06	4280	64.42
ENSG00000146535	GNA12	0.541511	6.30567e-06	116203	45.86
ENSG00000019169	MARCO	0.546552	6.55431e-06	52494	44.33
ENSG00000008438	PGLYRP1	0.566984	6.6179e-06	3900	57.65
ENSG00000157600	TMEM164	0.533843	6.71054e-06	180103	42.06
ENSG00000165140	FBP1	0.57082	6.91886e-06	37116	48.66
ENSG00000101255	TRIB3	0.589663	6.96865e-06	34724	50.47
ENSG00000115687	PASK	0.577047	6.96865e-06	44165	50.98
ENSG00000110324	IL10RA	0.565634	6.96865e-06	16667	49.19
ENSG00000129055	ANAPC13	0.549099	6.96865e-06	9010	45.33
ENSG00000101460	MAP1LC3A	0.602902	7.12025e-06	13491	52.56
ENSG00000010404	IDS	0.562992	7.18948e-06	44108	45.34
ENSG00000151136	BTBD11	0.519756	7.18948e-06	341221	46.12
ENSG00000111371	SLC38A1	0.569434	7.21476e-06	86954	39.96
ENSG00000139192	TAPBPL	0.533042	7.21476e-06	14827	50.43
ENSG00000133687	TMTC1	0.531906	7.21801e-06	283919	39.27
ENSG00000077454	LRCH4	0.520959	7.25031e-06	12118	60.34
ENSG00000111666	CHPT1	0.574326	7.27508e-06	47193	38.42
ENSG00000115607	IL18RAP	0.517391	7.2958e-06	33876	40.03
ENSG00000135519	KCNH3	0.548732	7.37765e-06	19307	57.69
ENSG00000206337	HCP5	0.528784	7.4404e-06	15766	49.39
ENSG00000157895	C12orf43	0.525462	7.4404e-06	16016	49.65
ENSG00000132603	NIP7	0.541183	7.5164e-06	5110	47.96
ENSG00000196912	ANKRD36B	0.512823	7.54421e-06	97302	35.8
ENSG00000257103	LSM14A	0.522382	7.62385e-06	57011	39.83
ENSG00000145012	LPP	0.536066	7.85969e-06	737387	39.17
ENSG00000138834	MAPK8IP3	0.525385	7.93499e-06	64134	56.84
ENSG00000105374	NKG7	0.55897	8.04683e-06	1095	59.03
ENSG00000205560	CPT1B	0.517276	8.09911e-06	9604	58.44
ENSG00000198837	DENND4B	0.543089	8.12221e-06	17217	56.5
ENSG00000076641	PAG1	0.570156	8.22158e-06	144258	40.56
ENSG00000116157	GPX7	0.506191	8.36788e-06	6680	49.68
ENSG00000044115	CTNNA1	0.516879	8.40278e-06	324067	44.15
ENSG00000125611	CHCHD5	0.522462	8.47912e-06	5035	53.69
ENSG00000171611	PTCRA	0.545645	8.84744e-06	9849	50.96
ENSG00000078674	PCM1	0.52245	8.88818e-06	107104	36.54
ENSG00000142552	RCN3	0.526214	9.02515e-06	18959	53.5
ENSG00000170638	TRABD	0.493649	9.02515e-06	13683	62.8
ENSG00000176845	METRNL	0.575454	9.06349e-06	15513	63.19
ENSG00000178860	MSC	0.578747	9.09682e-06	2919	58.6
ENSG00000021762	OSBPL5	0.569598	9.28488e-06	79632	57
ENSG00000101335	MYL9	0.559429	9.3301e-06	9950	58.6
ENSG00000171860	C3AR1	0.528127	9.50308e-06	9515	41.16
ENSG00000171988	JMJD1C	0.548967	9.6097e-06	354629	38.11
ENSG00000128271	ADORA2A	0.549397	9.64965e-06	24478	59.24
ENSG00000243804	LY6G6F	0.519037	9.71754e-06	3711	53.18
ENSG00000177575	CD163	0.536441	1.00699e-05	33080	37.42
ENSG00000184221	OLIG1	0.560096	1.02371e-05	2272	64.8
ENSG00000183625	CCR3	0.546933	1.04328e-05	103102	40.99
ENSG00000103313	MEFV	0.547155	1.09888e-05	14599	51.42
ENSG00000176022	B3GALT6	0.53251	1.09888e-05	2804	64.21
ENSG00000117400	MPL	0.541184	1.11385e-05	16648	48.16
ENSG00000140090	SLC24A4	0.537033	1.1188e-05	178902	47.94
ENSG00000127952	STYXL1	0.561951	1.12741e-05	51666	48.42
ENSG00000100151	PICK1	0.515921	1.16535e-05	19390	54.9
ENSG00000131203	IDO1	0.528515	1.17916e-05	26515	39.07
ENSG00000061273	HDAC7	0.507042	1.18607e-05	50410	54.88
ENSG00000138376	BARD1	0.563147	1.1867e-05	84037	36.37
ENSG00000205309	NT5M	0.526828	1.1867e-05	44328	49.17
ENSG00000149557	FEZ1	0.579697	1.20543e-05	149687	42.92
ENSG00000100450	GZMH	0.530495	1.20543e-05	3219	52.14
ENSG00000005381	MPO	0.536001	1.20619e-05	11080	55.12
ENSG00000114013	CD86	0.515825	1.21453e-05	65777	40.77
ENSG00000169583	CLIC3	0.540279	1.23551e-05	1960	68.43
ENSG00000102393	GLA	0.568065	1.2392e-05	14739	42.8
ENSG00000160075	SSU72	0.549175	1.26142e-05	33190	53.86
ENSG00000204176	SYT15	0.548586	1.26162e-05	15956	52.37
ENSG00000225967	TAP2	0.53928	1.26827e-05	16796	43.8
ENSG00000102109	PCSK1N	0.512124	1.28602e-05	4514	55.39
ENSG00000018280	SLC11A1	0.553439	1.36623e-05	14865	55.34
ENSG00000158457	TSPAN33	0.556105	1.3689e-05	24992	48.41
ENSG00000171298	GAA	0.577913	1.38274e-05	18325	58.33
ENSG00000235162	C12orf75	0.575866	1.38274e-05	160807	41.95
ENSG00000117713	ARID1A	0.535663	1.3974e-05	88868	46.19
ENSG00000066583	ISOC1	0.558708	1.40786e-05	19279	38.93
ENSG00000138829	FBN2	0.525123	1.40786e-05	401276	37.12
ENSG00000170430	MGMT	0.548543	1.46998e-05	303793	45.58
ENSG00000008516	MMP25	0.530186	1.47968e-05	14165	58.37
ENSG00000076003	MCM6	0.512096	1.50703e-05	36817	40.29
ENSG00000169682	SPNS1	0.498906	1.57496e-05	10327	55.79
ENSG00000152684	PELO	0.537977	1.65914e-05	16128	38.89
ENSG00000176393	RNPEP	0.534137	1.65914e-05	23775	48.75
ENSG00000162341	TPCN2	0.543975	1.67714e-05	87384	56.48
ENSG00000165792	METTL17	0.51005	1.67714e-05	7265	45.05
ENSG00000170558	CDH2	0.518116	1.74015e-05	226164	37.18
ENSG00000197122	SRC	0.550967	1.79278e-05	61365	54.1
ENSG00000204632	HLA-G	0.571521	1.79923e-05	4158	56.38
ENSG00000182871	COL18A1	0.548751	1.8149e-05	108555	59.66
ENSG00000244482	LILRA6	0.553683	1.82969e-05	6199	55.42
ENSG00000108846	ABCC3	0.576096	1.83951e-05	57476	51.95
ENSG00000114423	CBLB	0.502704	1.86191e-05	214091	35.4
ENSG00000198373	WWP2	0.515904	1.87312e-05	179435	45.6
ENSG00000174469	CNTNAP2	0.523243	1.88408e-05	2304996	37.52
ENSG00000106066	CPVL	0.507723	1.88408e-05	200216	41
ENSG00000111671	SPSB2	0.491764	1.88408e-05	18423	49.45
ENSG00000140450	ARRDC4	0.53919	1.90088e-05	13130	39.4
ENSG00000180104	EXOC3	0.52555	1.94748e-05	28762	51.23
ENSG00000078177	N4BP2	0.512888	1.94748e-05	101402	40.51
ENSG00000184613	NELL2	0.543617	1.9538e-05	413573	36.23
ENSG00000189182	KRT77	0.49028	1.99807e-05	13898	51.06
ENSG00000085871	MGST2	0.512627	2.0069e-05	74977	43.46
ENSG00000134668	SPOCD1	0.506882	2.00794e-05	25629	49.3
ENSG00000180739	S1PR5	0.56239	2.01215e-05	5189	58.3
ENSG00000146232	NFKBIE	0.557508	2.01215e-05	7622	55.92
ENSG00000144218	AFF3	0.533123	2.01215e-05	647009	41.69
ENSG00000111644	ACRBP	0.52842	2.01215e-05	9358	51.64
ENSG00000169967	MAP3K2	0.527675	2.07405e-05	89735	38.69
ENSG00000141012	GALNS	0.48063	2.07405e-05	43236	60.17
ENSG00000153574	RPIA	0.553637	2.09156e-05	59256	41.23
ENSG00000136560	TANK	0.511069	2.13639e-05	99322	35.76
ENSG00000108523	RNF167	0.50817	2.13639e-05	5214	52.54
ENSG00000108256	NUFIP2	0.499147	2.13639e-05	38309	41.64
ENSG00000160318	CLDND2	0.563482	2.14743e-05	1905	66.05
ENSG00000182534	MXRA7	0.554139	2.19319e-05	38465	52.39
ENSG00000196562	SULF2	0.567085	2.24734e-05	130268	50.48
ENSG00000112299	VNN1	0.526947	2.25054e-05	33206	38.11
ENSG00000122678	POLM	0.528511	2.32488e-05	10468	56.54
ENSG00000104918	RETN	0.503495	2.35639e-05	1406	62.83
ENSG00000108839	ALOX12	0.518983	2.39208e-05	14705	48.88
ENSG00000160781	PAQR6	0.48739	2.42037e-05	4797	60.94
ENSG00000149499	EML3	0.530611	2.42742e-05	10547	57.83
ENSG00000181036	FCRL6	0.543059	2.4434e-05	15746	47.56
ENSG00000159692	CTBP1	0.517543	2.44904e-05	38505	60.99
ENSG00000153317	ASAP1	0.522724	2.49642e-05	391570	42.15
ENSG00000164253	WDR41	0.495267	2.51656e-05	194641	37.31
ENSG00000129933	MAU2	0.548575	2.54717e-05	37925	54.35
ENSG00000119537	KDSR	0.530398	2.55491e-05	39502	42.04
ENSG00000171522	PTGER4	0.551303	2.58515e-05	13820	41.96
ENSG00000103154	NECAB2	0.538941	2.58515e-05	34144	52.91
ENSG00000197353	LYPD2	0.581375	2.60009e-05	2382	65.04
ENSG00000143162	CREG1	0.549153	2.60009e-05	24688	44.5
ENSG00000121310	ECHDC2	0.490327	2.60124e-05	31302	47.09
ENSG00000123643	SLC36A1	0.528526	2.6238e-05	55333	42.72
ENSG00000141096	DPEP3	0.510915	2.65748e-05	4886	57.11
ENSG00000101916	TLR8	0.509064	2.67693e-05	16549	41.32
ENSG00000005020	SKAP2	0.495578	2.69458e-05	328171	36.94
ENSG00000243612	HLA-DOB	0.490764	2.7744e-05	4285	45.08
ENSG00000164237	CMBL	0.506096	2.80955e-05	32027	46.38
ENSG00000102575	ACP5	0.518132	2.83393e-05	4348	58.59
ENSG00000184939	ZFP90	0.556014	2.85715e-05	45982	44.64
ENSG00000108107	RPL28	0.518469	2.8876e-05	17318	52.79
ENSG00000104687	GSR	0.490298	2.94744e-05	49780	44.66
ENSG00000112679	DUSP22	0.511449	3.05978e-05	59725	47.53
ENSG00000135736	CCDC102A	0.519316	3.07265e-05	24390	56.03
ENSG00000120910	PPP3CC	0.524003	3.12952e-05	100323	39.2
ENSG00000187010	RHD	0.510428	3.143e-05	58052	46.66
ENSG00000188076	SCGB1C1	0.529226	3.14813e-05	1497	57.08
ENSG00000140961	OSGIN1	0.507993	3.26617e-05	35021	55.7
ENSG00000160408	ST6GALNAC6	0.509662	3.29145e-05	20087	53.52
ENSG00000164483	SAMD3	0.507165	3.29145e-05	221110	39.15
ENSG00000103642	LACTB	0.523832	3.36118e-05	20228	39.93
ENSG00000135205	CCDC146	0.52922	3.36316e-05	207099	39.17
ENSG00000101126	ADNP	0.497003	3.39415e-05	42521	41.67
ENSG00000007237	GAS7	0.527114	3.47122e-05	287942	47.97
ENSG00000010278	CD9	0.502037	3.48844e-05	38556	51.04
ENSG00000011422	PLAUR	0.543615	3.55722e-05	24452	49.94
ENSG00000159140	SON	0.499505	3.55921e-05	34443	38.69
ENSG00000104892	KLC3	0.510893	3.59677e-05	18086	55.18
ENSG00000136856	SLC2A8	0.515388	3.71445e-05	11286	57.79
ENSG00000066117	SMARCD1	0.498968	3.739e-05	15507	48.48
ENSG00000152672	CLEC4F	0.505679	3.8547e-05	11956	46.88
ENSG00000137441	FGFBP2	0.52699	3.8699e-05	9064	45.48
ENSG00000248099	INSL3	0.53254	3.87368e-05	5062	53.07
ENSG00000103942	HOMER2	0.516429	3.87368e-05	149207	45.38
ENSG00000128159	TUBGCP6	0.487018	3.88796e-05	27334	56.95
ENSG00000077984	CST7	0.504896	4.00328e-05	10659	56.39
ENSG00000162378	ZYG11B	0.537326	4.00366e-05	100883	41.29
ENSG00000151348	EXT2	0.485195	4.00525e-05	156289	40.51
ENSG00000153898	MCOLN2	0.534356	4.01354e-05	71530	40.38
ENSG00000127481	UBR4	0.516728	4.01354e-05	135756	43.74
ENSG00000142765	SYTL1	0.500288	4.01354e-05	11917	58.24
ENSG00000154889	MPPE1	0.523535	4.14533e-05	25744	45.05
ENSG00000064547	LPAR2	0.521068	4.17837e-05	5275	58.93
ENSG00000196743	GM2A	0.530095	4.24227e-05	58290	47.41
ENSG00000197912	SPG7	0.531226	4.2569e-05	67047	52.33
ENSG00000184709	LRRC26	0.5035	4.2569e-05	1293	74.57
ENSG00000100813	ACIN1	0.500674	4.29988e-05	37050	45.36
ENSG00000147439	BIN3	0.480602	4.31841e-05	48730	49.55
ENSG00000145703	IQGAP2	0.494258	4.32218e-05	304847	40.46
ENSG00000184113	CLDN5	0.571757	4.35844e-05	4521	63.73
ENSG00000125246	CLYBL	0.503132	4.43879e-05	290465	43.21
ENSG00000112053	SLC26A8	0.520534	4.51853e-05	81352	42.4
ENSG00000169704	GP9	0.51783	4.62114e-05	1639	63.29
ENSG00000133619	KRBA1	0.506746	4.63177e-05	19794	57.32
ENSG00000163602	RYBP	0.515012	4.64963e-05	74796	38.33
ENSG00000197530	MIB2	0.492803	4.6527e-05	15195	66.41
ENSG00000145335	SNCA	0.526995	4.77978e-05	137970	36.33
ENSG00000130881	LRP3	0.524303	4.77978e-05	31261	54.7
ENSG00000182118	FAM89A	0.524285	4.77978e-05	21296	47.03
ENSG00000164048	ZNF589	0.491508	4.80017e-05	58153	45.4
ENSG00000105483	CARD8	0.500979	4.83258e-05	75176	44.39
ENSG00000255423	EBLN2	0.488405	4.97337e-05	1678	41.75
ENSG00000164144	ARFIP1	0.475563	5.00869e-05	138526	37.33
ENSG00000156381	ANKRD9	0.530349	5.02436e-05	8032	59.94
ENSG00000160191	PDE9A	0.500536	5.02436e-05	121888	51.29
ENSG00000198417	MT1F	0.490644	5.04628e-05	2967	51.79
ENSG00000078124	ACER3	0.502106	5.05573e-05	165930	38.74
ENSG00000148926	ADM	0.508183	5.08257e-05	2324	58.97
ENSG00000125124	BBS2	0.502506	5.12625e-05	53251	40.14
ENSG00000126432	PRDX5	0.528991	5.14325e-05	3690	57.3
ENSG00000134954	ETS1	0.517958	5.14325e-05	128797	42.5
ENSG00000163485	ADORA1	0.479505	5.16329e-05	76751	48.14
ENSG00000122786	CALD1	0.474213	5.16329e-05	226477	40.05
ENSG00000124731	TREM1	0.52271	5.19091e-05	18756	47.2
ENSG00000044574	HSPA5	0.475958	5.25362e-05	6490	44.05
ENSG00000119669	IRF2BPL	0.531734	5.25696e-05	4165	62.84
ENSG00000130433	CACNG6	0.458862	5.35951e-05	20381	49.52
ENSG00000187017	ESPN	0.48129	5.36804e-05	36591	60.15
ENSG00000196187	TMEM63A	0.478501	5.36804e-05	36844	51.62
ENSG00000132205	EMILIN2	0.500757	5.37051e-05	68997	47.46
ENSG00000120915	EPHX2	0.518113	5.37355e-05	54783	47.54
ENSG00000174482	LINGO2	0.505868	5.40631e-05	722208	36.21
ENSG00000198121	LPAR1	0.515016	5.41022e-05	165195	38.26
ENSG00000238243	OR2W3	0.483157	5.41851e-05	944	56.93
ENSG00000167468	GPX4	0.526644	5.41857e-05	2865	69.47
ENSG00000147454	SLC25A37	0.484931	5.49088e-05	46507	48.38
ENSG00000150347	ARID5B	0.509176	5.67722e-05	195260	40.32
ENSG00000140743	CDR2	0.495019	5.97047e-05	91229	43.33
ENSG00000069702	TGFBR3	0.518484	6.11409e-05	225992	42.29
ENSG00000134539	KLRD1	0.531389	6.13135e-05	103550	37.43
ENSG00000100299	ARSA	0.500906	6.13135e-05	5419	61.2
ENSG00000128191	DGCR8	0.496366	6.13135e-05	31645	52.21
ENSG00000164978	NUDT2	0.535247	6.13853e-05	14205	46.38
ENSG00000007264	MATK	0.524223	6.13853e-05	24159	54.4
ENSG00000139370	SLC15A4	0.507578	6.16837e-05	30764	45.84
ENSG00000198876	DCAF12	0.519449	6.18669e-05	41012	45.99
ENSG00000110852	CLEC2B	0.496317	6.30041e-05	17152	32.91
ENSG00000204103	MAFB	0.517448	6.4178e-05	3388	56.42
ENSG00000172922	RNASEH2C	0.526935	6.4371e-05	6813	55.55
ENSG00000100453	GZMB	0.533873	6.52984e-05	3313	52.9
ENSG00000160683	CXCR5	0.529526	6.5408e-05	13895	54.2
ENSG00000104267	CA2	0.521513	6.55722e-05	17525	38.44
ENSG00000172059	KLF11	0.49762	6.55722e-05	11987	50.79
ENSG00000180902	D2HGDH	0.493986	6.55722e-05	34214	56.87
ENSG00000198792	TMEM184B	0.503448	6.56417e-05	53719	53.5
ENSG00000124275	MTRR	0.502833	6.65659e-05	54839	39.8
ENSG00000165092	ALDH1A1	0.491332	6.65659e-05	179771	36.05
ENSG00000129472	RAB2B	0.5106	6.67834e-05	17940	41.18
ENSG00000068745	IP6K2	0.487657	6.68934e-05	52350	47.61
ENSG00000189409	MMP23B	0.526269	6.71351e-05	3100	70.33
ENSG00000115758	ODC1	0.498045	6.819e-05	8359	45.53
ENSG00000151929	BAG3	0.51644	6.86301e-05	26439	49.76
ENSG00000012963	UBR7	0.478335	6.88904e-05	21974	43.11
ENSG00000160703	NLRX1	0.490499	6.9059e-05	17448	53.41
ENSG00000127838	PNKD	0.519873	7.05999e-05	76401	51.32
ENSG00000139842	CUL4A	0.490496	7.05999e-05	58915	45.97
ENSG00000156508	EEF1A1	0.510355	7.09083e-05	8047	47.14
ENSG00000103184	SEC14L5	0.491076	7.09467e-05	60827	49.84
ENSG00000143624	INTS3	0.502851	7.29024e-05	46758	48.34
ENSG00000110944	IL23A	0.501343	7.33024e-05	6236	49.11
ENSG00000071967	CYBRD1	0.490164	7.33024e-05	35882	41.27
ENSG00000174132	FAM174A	0.539858	7.5034e-05	51367	35.57
ENSG00000127328	RAB3IP	0.47797	7.52603e-05	84523	38.33
ENSG00000124491	F13A1	0.495254	7.54957e-05	176929	41.74
ENSG00000157168	NRG1	0.499613	7.71592e-05	1216444	37.94
ENSG00000188827	SLX4	0.482631	7.73226e-05	30425	52.41
ENSG00000158717	RNF166	0.504537	7.82788e-05	9909	62.55
ENSG00000176463	SLCO3A1	0.49474	7.82788e-05	318727	45.12
ENSG00000172967	XKR3	0.481755	7.83174e-05	38287	35.87
ENSG00000140575	IQGAP1	0.450357	7.83435e-05	113997	40.76
ENSG00000088833	NSFL1C	0.525041	7.8939e-05	31680	45.86
ENSG00000168904	LRRC28	0.512892	7.8939e-05	139367	38.12
ENSG00000131378	RFTN1	0.510688	8.15283e-05	200452	43.5
ENSG00000185052	SLC24A3	0.505816	8.16416e-05	510284	43.88
ENSG00000066336	SPI1	0.514562	8.29638e-05	23687	52.6
ENSG00000172349	IL16	0.509849	8.3285e-05	154483	43.65
ENSG00000125450	NUP85	0.471926	8.39617e-05	30099	48.14
ENSG00000163950	SLBP	0.476821	8.50233e-05	19613	46.71
ENSG00000138735	PDE5A	0.469533	8.5346e-05	134407	36.4
ENSG00000174106	LEMD3	0.512876	8.72528e-05	78772	35.54
ENSG00000173369	C1QB	0.478895	8.8549e-05	8875	51.05
ENSG00000138821	SLC39A8	0.514814	9.01704e-05	180217	38.15
ENSG00000178605	GTPBP6	0.459838	9.01704e-05	14290	57.63
ENSG00000228278	ORM2	0.489663	9.10479e-05	3387	55.17
ENSG00000135525	MAP7	0.474198	9.17008e-05	208538	39.29
ENSG00000101200	AVP	0.468184	9.17008e-05	2168	67.96
ENSG00000176340	COX8A	0.45677	9.43369e-05	1923	56.81
ENSG00000171763	SPATA5L1	0.478243	9.61302e-05	19079	41.46
ENSG00000167528	ZNF641	0.49271	9.61964e-05	14234	46.15
ENSG00000251474	RPL32P3	0.485314	9.6794e-05	16733	50.11
ENSG00000132842	AP3B1	0.471963	9.68318e-05	292372	36.56
ENSG00000137101	CD72	0.451452	9.76746e-05	36831	46.81
ENSG00000213983	AP1G2	0.477465	9.77937e-05	8505	55.18
ENSG00000140157	NIPA2	0.447989	0.000100822	30718	43.68
ENSG00000125817	CENPB	0.47342	0.000101253	2889	66.51
ENSG00000185909	KLHDC8B	0.479691	0.000101744	4888	58.07
ENSG00000164111	ANXA5	0.482784	0.000102064	29049	38.94
ENSG00000105507	CABP5	0.502418	0.00010294	14696	46.77
ENSG00000173992	CCS	0.468024	0.00010294	12866	51.29
ENSG00000160180	TFF3	0.543835	0.000103635	3984	54.43
ENSG00000137757	CASP5	0.464125	0.000103962	28933	37.19
ENSG00000101605	MYOM1	0.499256	0.000104305	153161	40.55
ENSG00000103126	AXIN1	0.492328	0.00010441	65283	54.38
ENSG00000108669	CYTH1	0.453114	0.00010545	108249	45.26
ENSG00000092621	PHGDH	0.469045	0.000106427	95815	43.78
ENSG00000187260	WDR86	0.495024	0.00010662	34818	57.01
ENSG00000160305	DIP2A	0.469731	0.00010662	111124	44.88
ENSG00000153071	DAB2	0.51859	0.000106713	90625	38.96
ENSG00000173821	RNF213	0.468382	0.00010742	137920	49.93
ENSG00000113108	APBB3	0.483276	0.000107729	6513	53.75
ENSG00000066926	FECH	0.487678	0.000107843	42325	42.64
ENSG00000100385	IL2RB	0.491448	0.000108463	49211	54.21
ENSG00000038427	VCAN	0.484612	0.000110209	110685	37.18
ENSG00000164040	PGRMC2	0.473552	0.000110376	19592	38.64
ENSG00000149527	PLCH2	0.517468	0.000110421	79552	64.61
ENSG00000115649	CNPPD1	0.477619	0.0001106	6209	54.28
ENSG00000116791	CRYZ	0.488384	0.000112045	27926	39.61
ENSG00000138185	ENTPD1	0.503394	0.00011319	165487	40.86
ENSG00000154832	CXXC1	0.459293	0.000113269	5961	59.29
ENSG00000185591	SP1	0.496939	0.000113605	36270	45.65
ENSG00000172538	FAM170B	0.451848	0.000113655	2867	49.79
ENSG00000165355	FBXO33	0.472259	0.000114191	34831	38.98
ENSG00000104915	STX10	0.469547	0.000114414	6325	55.36
ENSG00000113810	SMC4	0.50903	0.00011467	35680	36.23
ENSG00000189283	FHIT	0.470154	0.000117225	1504182	38.91
ENSG00000113721	PDGFRB	0.528133	0.000120237	42033	54.34
ENSG00000082438	COBLL1	0.483308	0.000120674	190055	36.27
ENSG00000041802	LSG1	0.498179	0.000120684	31672	41.68
ENSG00000158792	SPATA2L	0.469851	0.000121707	5348	62.68
ENSG00000121807	CCR2	0.46714	0.000123759	7194	44.06
ENSG00000139899	CBLN3	0.509412	0.00012505	4409	60.63
ENSG00000068971	PPP2R5B	0.472685	0.000126744	16922	54.41
ENSG00000085563	ABCB1	0.460418	0.000130954	210306	37.02
ENSG00000139190	VAMP1	0.438149	0.000133766	8750	48.87
ENSG00000186827	TNFRSF4	0.477218	0.000133831	2813	70.33
ENSG00000110011	DNAJC4	0.466097	0.000134208	4008	58.22
ENSG00000184752	NDUFA12	0.477197	0.000134625	106693	43.14
ENSG00000134324	LPIN1	0.491562	0.000135157	149814	46.76
ENSG00000168056	LTBP3	0.459959	0.000135671	20125	60.22
ENSG00000025039	RRAGD	0.472584	0.000135995	47657	42.23
ENSG00000116983	HPCAL4	0.519764	0.000136362	12837	52.5
ENSG00000148288	GBGT1	0.470091	0.000136444	10985	54.87
ENSG00000173114	LRRN3	0.493625	0.000137667	34448	34.94
ENSG00000075142	SRI	0.465305	0.000137751	21878	39.54
ENSG00000148296	SURF6	0.48606	0.000138783	7412	52.81
ENSG00000188026	RILPL1	0.456394	0.000141754	63665	50.55
ENSG00000240065	PSMB9	0.455909	0.00014331	15715	50.17
ENSG00000148290	SURF1	0.46981	0.000143423	4918	53.97
ENSG00000112096	SOD2	0.501038	0.000143578	76117	42.75
ENSG00000123179	EBPL	0.474339	0.000147122	30812	45.54
ENSG00000198604	BAZ1A	0.460634	0.000149186	122916	39.75
ENSG00000179833	SERTAD2	0.502068	0.00014972	119384	40.14
ENSG00000152520	PAN3	0.467795	0.00014972	156829	37.49
ENSG00000112305	SMAP1	0.50137	0.000149749	194235	37.73
ENSG00000130522	JUND	0.503441	0.000149876	1928	69.93
ENSG00000055955	ITIH4	0.491129	0.000149876	17726	55.63
ENSG00000114812	VIPR1	0.472099	0.000149876	48274	52.67
ENSG00000003137	CYP26B1	0.470807	0.000149876	18800	59.96
ENSG00000160460	SPTBN4	0.460299	0.000149876	110223	51.05
ENSG00000106537	TSPAN13	0.45012	0.000149876	30781	39.01
ENSG00000126777	KTN1	0.489073	0.000151042	142454	37.04
ENSG00000063245	EPN1	0.515171	0.000151637	34632	54.85
ENSG00000196083	IL1RAP	0.482082	0.000152549	145699	37.94
ENSG00000141469	SLC14A1	0.518486	0.000153768	65495	43.44
ENSG00000128218	VPREB3	0.471734	0.000155617	1682	56.21
ENSG00000125826	RBCK1	0.496548	0.000156313	24641	51.27
ENSG00000083444	PLOD1	0.487857	0.000156313	41333	53.54
ENSG00000184207	PGP	0.497034	0.0001567	3247	61.33
ENSG00000141556	TBCD	0.484226	0.00015778	193849	52.84
ENSG00000105258	POLR2I	0.478161	0.00015778	1504	60.73
ENSG00000180644	PRF1	0.503678	0.000158706	5411	56.54
ENSG00000137103	TMEM8B	0.508281	0.000159635	51067	49.95
ENSG00000175567	UCP2	0.473565	0.000159635	8574	53.03
ENSG00000130177	CDC16	0.454823	0.000159635	37836	41.32
ENSG00000073737	DHRS9	0.490494	0.000162557	31378	39.63
ENSG00000117362	APH1A	0.455042	0.000168479	4181	53.83
ENSG00000168040	FADD	0.431066	0.000168479	4094	54.53
ENSG00000082781	ITGB5	0.514173	0.000169271	139470	46.61
ENSG00000003249	DBNDD1	0.505091	0.00016955	15257	59.38
ENSG00000138180	CEP55	0.461288	0.00016955	32480	40.69
ENSG00000204899	MZT1	0.473273	0.000169832	19262	38.81
ENSG00000117500	TMED5	0.47907	0.000171461	30774	38
ENSG00000144802	NFKBIZ	0.504244	0.000171644	33031	40.23
ENSG00000179862	CITED4	0.495549	0.000172818	1309	73.51
ENSG00000163584	RPL22L1	0.466415	0.000174832	5333	39.31
ENSG00000137776	SLTM	0.471314	0.000176274	54629	38.75
ENSG00000214063	TSPAN4	0.454872	0.000176654	24304	65.02
ENSG00000178789	CD300LB	0.499329	0.000177102	10301	51.6
ENSG00000103249	CLCN7	0.473325	0.000178756	30150	59.82
ENSG00000197548	ATG7	0.505412	0.000179191	285356	43.27
ENSG00000103196	CRISPLD2	0.546003	0.000179387	100783	50.35
ENSG00000225783	MIAT	0.473652	0.00018518	30064	50
ENSG00000130816	DNMT1	0.483528	0.000186076	97941	50.43
ENSG00000176422	SPRYD4	0.445356	0.000186076	11130	48.12
ENSG00000102007	PLP2	0.466536	0.000186891	3337	54.07
ENSG00000162302	RPS6KA4	0.462487	0.000187717	13067	56.99
ENSG00000017797	RALBP1	0.465301	0.000190242	63105	41.37
ENSG00000111906	HDDC2	0.487428	0.000191045	82116	40.11
ENSG00000100644	HIF1A	0.481066	0.000191045	52746	37.25
ENSG00000173442	EHBP1L1	0.45785	0.000191045	16604	60.61
ENSG00000101365	IDH3B	0.466966	0.000191711	5824	51.38
ENSG00000158321	AUTS2	0.449138	0.000192379	1195210	41.07
ENSG00000141736	ERBB2	0.463564	0.000192409	42512	52.09
ENSG00000108479	GALK1	0.45649	0.000193605	13642	60.16
ENSG00000166710	B2M	0.452242	0.000195784	7390	42.61
ENSG00000108465	CDK5RAP3	0.473593	0.000198949	13971	51.5
ENSG00000156475	PPP2R2B	0.493645	0.000199145	503638	39.61
ENSG00000156976	EIF4A2	0.466928	0.000200074	6692	41.92
ENSG00000052749	RRP12	0.483548	0.000206062	69718	50.49
ENSG00000158525	CPA5	0.460042	0.000207118	23914	50.6
ENSG00000108599	AKAP10	0.470169	0.000207126	74041	41.26
ENSG00000054148	PHPT1	0.470266	0.000209799	2303	66.23
ENSG00000234012	MDC1	0.452682	0.000210693	18081	48.86
ENSG00000110074	FOXRED1	0.46585	0.000211721	9076	51.05
ENSG00000099804	CDC34	0.476017	0.000212961	10332	64.64
ENSG00000135469	COQ10A	0.44091	0.000212961	4108	50.99
ENSG00000139970	RTN1	0.470962	0.000213966	274800	39.18
ENSG00000138439	FAM117B	0.497992	0.000214721	134788	39.58
ENSG00000185112	FAM43A	0.486466	0.000217622	3154	61.97
ENSG00000102032	RENBP	0.484262	0.000217622	9418	55.76
ENSG00000100258	LMF2	0.444309	0.000217931	4753	67.14
ENSG00000244617	ASPRV1	0.470948	0.000217992	2176	55.49
ENSG00000187699	C2orf88	0.487313	0.000218558	323875	37.45
ENSG00000170876	TMEM43	0.46677	0.000219856	18665	52.71
ENSG00000232569	GABBR1	0.440182	0.000220414	77570	44.88
ENSG00000073150	PANX2	0.509134	0.000221143	9564	64.17
ENSG00000167775	CD320	0.502178	0.00022153	6231	58.36
ENSG00000160948	VPS28	0.464142	0.00022153	4962	63.23
ENSG00000221983	UBA52	0.460373	0.00022153	5820	53.24
ENSG00000137100	DCTN3	0.436276	0.00022153	6978	49.85
ENSG00000135362	PRR5L	0.490285	0.000221664	168916	43.76
ENSG00000161981	SNRNP25	0.452954	0.000221833	3841	54.76
ENSG00000196151	WDSUB1	0.445525	0.000223106	51006	39.11
ENSG00000145990	GFOD1	0.504426	0.000224017	129832	44.97
ENSG00000109133	TMEM33	0.479136	0.000224017	25674	35.28
ENSG00000158773	USF1	0.484152	0.000224353	6726	50.71
ENSG00000135899	SP110	0.463904	0.000224679	58436	42.37
ENSG00000162676	GFI1	0.462167	0.00022665	13882	53.67
ENSG00000174652	ZNF266	0.451846	0.000227086	23110	44.97
ENSG00000126267	COX6B1	0.444511	0.000228035	10459	48.83
ENSG00000148297	MED22	0.45099	0.000229244	9819	56.87
ENSG00000103740	ACSBG1	0.437713	0.000229244	78220	48.23
ENSG00000196154	S100A4	0.441031	0.000230925	6523	56.3
ENSG00000004777	ARHGAP33	0.46098	0.000231504	14290	60.93
ENSG00000127947	PTPN12	0.477186	0.000235334	102774	38.15
ENSG00000173848	NET1	0.500906	0.000236619	46499	37
ENSG00000162413	KLHL21	0.479979	0.000239036	23883	54.46
ENSG00000183337	BCOR	0.432744	0.000239036	127514	53.23
ENSG00000054523	KIF1B	0.436118	0.000241492	170798	41.99
ENSG00000115138	POMC	0.475477	0.000242607	8050	51.16
ENSG00000147654	EBAG9	0.467345	0.000244668	26285	34.99
ENSG00000182809	CRIP2	0.490417	0.000245124	7200	69.59
ENSG00000100599	RIN3	0.474943	0.000245453	175213	49.34
ENSG00000100092	SH3BP1	0.447793	0.000247391	21465	57.36
ENSG00000101439	CST3	0.485873	0.000247812	11767	51.65
ENSG00000141458	NPC1	0.468416	0.00024808	80322	44.65
ENSG00000130560	UBAC1	0.466014	0.00025188	28404	51.81
ENSG00000182154	MRPL41	0.465911	0.000254006	676	68.39
ENSG00000179163	FUCA1	0.467582	0.000254109	23217	45.7
ENSG00000172005	MAL	0.452592	0.000254617	28315	52.06
ENSG00000185808	PIGP	0.476233	0.000254977	14000	42.2
ENSG00000135318	NT5E	0.461956	0.000255012	46207	43.07
ENSG00000125089	SH3TC1	0.468045	0.000255891	59731	57.48
ENSG00000172232	AZU1	0.456826	0.000255891	6921	58.64
ENSG00000155629	PIK3AP1	0.434179	0.000257456	127199	44.36
ENSG00000174600	CMKLR1	0.493692	0.000262139	51273	49.34
ENSG00000183617	MRPL54	0.450162	0.000262139	5893	56.41
ENSG00000116754	SRSF11	0.454056	0.000262662	47370	37.01
ENSG00000166387	PPFIBP2	0.49143	0.00026375	143829	45.46
ENSG00000137331	IER3	0.457712	0.00026375	1349	58.52
ENSG00000099365	STX1B	0.475221	0.0002652	21382	55.21
ENSG00000150093	ITGB1	0.455709	0.0002652	105474	39.15
ENSG00000125148	MT2A	0.505739	0.000265854	913	54.16
ENSG00000047597	XK	0.484146	0.000266128	46339	39.51
ENSG00000132466	ANKRD17	0.442599	0.000266501	185422	36.17
ENSG00000111897	SERINC1	0.446434	0.00026963	28456	35.93
ENSG00000011405	PIK3C2A	0.487789	0.000271175	130253	39.84
ENSG00000121104	FAM117A	0.468295	0.000271175	78848	46.7
ENSG00000160883	HK3	0.460514	0.000271175	18477	54.27
ENSG00000166928	MS4A14	0.446236	0.000271245	39226	38.93
ENSG00000132182	NUP210	0.47285	0.000272115	104087	52.6
ENSG00000074370	ATP2A3	0.476242	0.000273192	40594	56.9
ENSG00000117281	CD160	0.495244	0.000273971	19817	42.04
ENSG00000100365	NCF4	0.477895	0.000273971	17029	53.4
ENSG00000169508	GPR183	0.499677	0.000276673	12860	38.07
ENSG00000148484	RSU1	0.422498	0.000281123	226852	41.14
ENSG00000150687	PRSS23	0.461374	0.000282321	161851	42.16
ENSG00000127415	IDUA	0.45462	0.000283221	17567	65.37
ENSG00000016864	GLT8D1	0.439996	0.000283221	11544	44.49
ENSG00000100097	LGALS1	0.474657	0.000285797	4166	56.68
ENSG00000103202	NME4	0.485151	0.000286357	13642	58.71
ENSG00000103051	COG4	0.471568	0.000286357	42992	47.23
ENSG00000164088	PPM1M	0.456041	0.000286357	4840	58.31
ENSG00000213445	SIPA1	0.447465	0.000286357	12817	60.74
ENSG00000186376	ZNF75D	0.435178	0.000286357	95189	41.68
ENSG00000166091	CMTM5	0.486892	0.000286784	2999	58.17
ENSG00000179598	PLD6	0.464232	0.000286784	5338	55.95
ENSG00000119138	KLF9	0.462911	0.000286784	30027	43.93
ENSG00000112511	PHF1	0.445455	0.000287124	6054	57.49
ENSG00000105647	PIK3R2	0.464737	0.000287841	17369	57.71
ENSG00000101782	RIOK3	0.482444	0.000288216	33316	41.69
ENSG00000133055	MYBPH	0.488915	0.000289516	8015	57.63
ENSG00000154222	CC2D1B	0.46328	0.000291902	20470	51.22
ENSG00000127152	BCL11B	0.479558	0.000291972	102910	50.78
ENSG00000176945	MUC20	0.461138	0.000292951	20239	50.62
ENSG00000149182	ARFGAP2	0.435847	0.000292951	12826	53.19
ENSG00000113088	GZMK	0.470789	0.000293687	10314	40.28
ENSG00000180537	RNF182	0.466164	0.00029424	55864	38.5
ENSG00000224455	VPS52	0.461801	0.00029557	21755	45.64
ENSG00000174125	TLR1	0.441629	0.00029727	66140	40.78
ENSG00000127314	RAP1B	0.459471	0.00029874	61046	38.94
ENSG00000183828	NUDT14	0.460409	0.000299032	8385	64.58
ENSG00000163125	RPRD2	0.463415	0.000300638	113475	41.76
ENSG00000166501	PRKCB	0.456278	0.000300638	384628	43.77
ENSG00000172500	FIBP	0.415334	0.000300638	4791	55.13
ENSG00000187116	LILRA5	0.454753	0.000302521	6096	50.55
ENSG00000175931	UBE2O	0.441356	0.000304031	63696	49.84
ENSG00000057657	PRDM1	0.474962	0.000305767	116476	40.37
ENSG00000124688	MAD2L1BP	0.444778	0.000305767	11412	49.25
ENSG00000141524	TMC6	0.45043	0.000309493	21949	61.98
ENSG00000011105	TSPAN9	0.492967	0.000310043	209209	52.13
ENSG00000113263	ITK	0.489222	0.000311852	112252	41.46
ENSG00000172575	RASGRP1	0.485775	0.000311852	77472	41.82
ENSG00000169228	RAB24	0.474531	0.000311852	2546	57.83
ENSG00000121774	KHDRBS1	0.468687	0.000311852	46982	43.61
ENSG00000143753	DEGS1	0.466942	0.000311852	17685	46.06
ENSG00000226704	HSPA1L	0.46161	0.000313182	5446	48.67
ENSG00000102409	BEX4	0.474427	0.000314606	2138	51.94
ENSG00000213903	LTB4R	0.504913	0.000316057	6586	53.67
ENSG00000135596	MICAL1	0.461666	0.000317516	21906	50.36
ENSG00000120675	DNAJC15	0.466346	0.000318762	91010	38.12
ENSG00000163508	EOMES	0.449391	0.000318813	6762	47.95
ENSG00000143119	CD53	0.501715	0.000319027	28734	39.53
ENSG00000107331	ABCA2	0.461724	0.000319027	21688	66.66
ENSG00000164683	HEY1	0.446322	0.000319027	5486	45.23
ENSG00000160213	CSTB	0.434759	0.000322856	3807	53.57
ENSG00000131791	PRKAB2	0.433042	0.000324307	17444	39.83
ENSG00000198862	LTN1	0.434373	0.000327594	64812	36.74
ENSG00000005961	ITGA2B	0.488246	0.000329673	17469	54.81
ENSG00000107957	SH3PXD2A	0.479291	0.000331508	261516	51.58
ENSG00000126088	UROD	0.454312	0.000331508	4625	53.72
ENSG00000225737	SKIV2L	0.445404	0.000331508	10671	54.17
ENSG00000156873	PHKG2	0.444275	0.00033362	12883	52.58
ENSG00000151553	FAM160B1	0.455511	0.000334087	78088	39.9
ENSG00000181274	FRAT2	0.460809	0.000334933	2232	60.32
ENSG00000204859	ZBTB48	0.449194	0.000334988	9286	57.77
ENSG00000169919	GUSB	0.459475	0.000336952	21531	51.96
ENSG00000146918	NCAPG2	0.438385	0.000337074	73635	41.8
ENSG00000170989	S1PR1	0.48697	0.000341201	6848	44.09
ENSG00000092964	DPYSL2	0.435139	0.000341201	144147	44.97
ENSG00000107736	CDH23	0.459451	0.000349121	419027	52.3
ENSG00000149311	ATM	0.454975	0.000350696	146618	37.52
ENSG00000119718	EIF2B2	0.500222	0.000352105	9445	44.02
ENSG00000157551	KCNJ15	0.477553	0.000352105	151808	41.07
ENSG00000063761	ADCK1	0.432401	0.000352105	134905	47.62
ENSG00000157045	NTAN1	0.480763	0.000352559	18225	47.6
ENSG00000167323	STIM1	0.451583	0.000354328	238683	42.52
ENSG00000137486	ARRB1	0.448277	0.000354328	91583	52.02
ENSG00000117682	DHDDS	0.433329	0.000355008	39024	45.46
ENSG00000147677	EIF3H	0.452014	0.000357233	124795	37.79
ENSG00000151835	SACS	0.473423	0.000358078	104914	41.26
ENSG00000214530	STARD10	0.471215	0.000359298	38952	54.31
ENSG00000123700	KCNJ2	0.435159	0.000360665	11371	41.95
ENSG00000109689	STIM2	0.471283	0.000361693	167780	36.6
ENSG00000151577	DRD3	0.413178	0.000366464	71827	41.04
ENSG00000187688	TRPV2	0.472566	0.000368896	21432	53.24
ENSG00000155957	TMBIM4	0.436073	0.000369061	34226	38.11
ENSG00000163141	BNIPL	0.431124	0.000369061	11399	47.22
ENSG00000101639	CEP192	0.424222	0.00037001	133690	40.44
ENSG00000119878	CRIPT	0.456474	0.000370694	13760	39.04
ENSG00000095321	CRAT	0.438296	0.000370694	16395	58.43
ENSG00000106772	PRUNE2	0.42579	0.000371833	294738	41.04
ENSG00000092199	HNRNPC	0.442609	0.000376283	60358	39.78
ENSG00000075420	FNDC3B	0.429017	0.000380372	362091	39.76
ENSG00000065268	WDR18	0.438182	0.000381228	14106	62.24
ENSG00000067606	PRKCZ	0.459378	0.000384461	134984	56.45
ENSG00000002919	SNX11	0.471485	0.000386022	19717	48
ENSG00000159214	CCDC24	0.4487	0.000389106	5169	57.95
ENSG00000089505	CMTM1	0.449754	0.000391882	12744	43.3
ENSG00000142583	SLC2A5	0.460021	0.000396304	53372	47.92
ENSG00000149212	SESN3	0.463987	0.000397382	67028	35.27
ENSG00000166987	MBD6	0.450623	0.000397382	9438	57.85
ENSG00000139998	RAB15	0.434062	0.000398641	27412	52.17
ENSG00000130558	OLFM1	0.471249	0.00040159	45757	55.24
ENSG00000214688	C10orf105	0.446517	0.000402477	26123	55.39
ENSG00000140199	SLC12A6	0.440518	0.000403019	108276	39.55
ENSG00000103811	CTSH	0.441049	0.00040363	28516	52.42
ENSG00000023287	RB1CC1	0.442873	0.000407052	123385	37.73
ENSG00000168646	AXIN2	0.449244	0.000410313	33085	51.32
ENSG00000146070	PLA2G7	0.494783	0.000414879	31492	40.97
ENSG00000172590	MRPL52	0.481569	0.000415759	5158	47.12
ENSG00000145860	RNF145	0.449553	0.000415759	52644	36.97
ENSG00000159445	THEM4	0.449525	0.000415759	38771	42.26
ENSG00000176749	CDK5R1	0.441123	0.000415759	4260	56.09
ENSG00000004809	SLC22A16	0.494652	0.000416974	51954	41.33
ENSG00000100058	CRYBB2P1	0.471551	0.000419631	72749	45.32
ENSG00000135912	TTLL4	0.467303	0.000420842	44581	44.96
ENSG00000114166	KAT2B	0.450166	0.000424092	113958	40.07
ENSG00000163694	RBM47	0.47717	0.000424316	207608	43.22
ENSG00000150977	RILPL2	0.456039	0.000424316	26034	49.36
ENSG00000082996	RNF13	0.464048	0.000424915	149431	36.39
ENSG00000084072	PPIE	0.479196	0.000426419	71732	45.04
ENSG00000168765	GSTM4	0.4403	0.000426419	18737	49.95
ENSG00000128699	ORMDL1	0.449742	0.000432997	14097	37.52
ENSG00000101888	NXT2	0.435492	0.000435206	8909	37.4
ENSG00000110448	CD5	0.467615	0.000435267	25363	52.91
ENSG00000198467	TPM2	0.434285	0.000435267	8064	54.9
ENSG00000065613	SLK	0.428378	0.000435555	62093	36.59
ENSG00000180353	HCLS1	0.468719	0.000436788	29528	41.45
ENSG00000044446	PHKA2	0.460487	0.000436788	91816	45.6
ENSG00000116824	CD2	0.450016	0.00043687	14799	47.11
ENSG00000149516	MS4A3	0.446568	0.000438295	14528	39.16
ENSG00000118495	PLAGL1	0.448713	0.000439072	124299	40.32
ENSG00000205784	ARRDC5	0.439877	0.000439072	12459	50.27
ENSG00000100284	TOM1	0.49231	0.000443214	48717	53.52
ENSG00000182472	CAPN12	0.449575	0.000443214	39717	51.15
ENSG00000078269	SYNJ2	0.447739	0.000446219	117313	49.67
ENSG00000133243	BTBD2	0.43283	0.000446938	49443	55.3
ENSG00000177119	ANO6	0.432167	0.000446938	224417	39.44
ENSG00000118922	KLF12	0.469173	0.000446945	308967	37.64
ENSG00000196730	DAPK1	0.437714	0.000447581	211406	45.13
ENSG00000170525	PFKFB3	0.44958	0.000451295	109710	50.91
ENSG00000139508	SLC46A3	0.434053	0.000451478	18906	40.19
ENSG00000010810	FYN	0.461669	0.000451665	213120	42.42
ENSG00000153814	JAZF1	0.460785	0.000451665	350222	41.44
ENSG00000137198	GMPR	0.440313	0.000451665	56962	47.82
ENSG00000213625	LEPROT	0.430636	0.000452511	15420	40.78
ENSG00000197562	RAB40C	0.418828	0.000452511	39915	56.81
ENSG00000114388	NPRL2	0.472374	0.000460926	3496	56.13
ENSG00000115365	LANCL1	0.454026	0.000460926	46403	38.12
ENSG00000110851	PRDM4	0.426999	0.000460926	28401	41.2
ENSG00000111711	GOLT1B	0.456259	0.000461208	16627	35.99
ENSG00000196664	TLR7	0.493334	0.000461278	23289	40.25
ENSG00000147119	CHST7	0.459331	0.000468427	24731	44.77
ENSG00000100351	GRAP2	0.435732	0.000468936	72637	44.48
ENSG00000154146	NRGN	0.459604	0.000474085	7268	53.05
ENSG00000104660	LEPROTL1	0.472508	0.000475131	81800	42.61
ENSG00000140403	DNAJA4	0.462587	0.000477293	18110	47.08
ENSG00000179454	KLHL28	0.421526	0.000477443	117998	37.29
ENSG00000171552	BCL2L1	0.433047	0.000479734	59537	48.2
ENSG00000196843	ARID5A	0.433315	0.000484314	15891	55.34
ENSG00000250361	GYPB	0.464932	0.000490554	23276	37.19
ENSG00000113924	HGD	0.459624	0.000492091	54097	41.25
ENSG00000206561	COLQ	0.438543	0.00049214	71618	46.58
ENSG00000144354	CDCA7	0.441226	0.000493354	14177	43.24
ENSG00000136867	SLC31A2	0.458137	0.000496388	13164	48.03
ENSG00000163412	EIF4E3	0.430803	0.000500624	79359	41.79
ENSG00000164331	ANKRA2	0.420632	0.000504497	13477	37.11
ENSG00000106560	GIMAP2	0.440326	0.000505052	7944	44.17
ENSG00000116191	RALGPS2	0.440258	0.000505052	196694	36.82
ENSG00000090857	PDPR	0.466086	0.000505933	48205	47.1
ENSG00000160439	RDH13	0.45386	0.000505933	32183	52.13
ENSG00000124535	WRNIP1	0.455922	0.00050801	21559	44.71
ENSG00000065135	GNAI3	0.416414	0.000508762	51580	38.65
ENSG00000114841	DNAH1	0.422149	0.000511025	84172	55.25
ENSG00000149564	ESAM	0.459855	0.000511541	9707	54.05
ENSG00000164506	STXBP5	0.440255	0.000511541	186051	34.37
ENSG00000076043	REXO2	0.464818	0.000513518	10893	39.61
ENSG00000125656	CLPP	0.446198	0.000516265	8711	53.34
ENSG00000091157	WDR7	0.445735	0.000517677	385263	36.37
ENSG00000138767	CNOT6L	0.488463	0.00052745	106228	36.25
ENSG00000111450	STX2	0.46244	0.000527789	49666	45.87
ENSG00000168685	IL7R	0.45062	0.000529868	26908	39.18
ENSG00000137496	IL18BP	0.473793	0.000533935	7102	57.1
ENSG00000160404	TOR2A	0.416755	0.000533935	3789	59.82
ENSG00000110665	C11orf21	0.420097	0.000535218	7421	60.54
ENSG00000103978	TMEM87A	0.422407	0.0005364	63137	38.91
ENSG00000101421	CHMP4B	0.437215	0.000537898	43018	46.39
ENSG00000106123	EPHB6	0.440576	0.000539841	16033	52.35
ENSG00000169877	AHSP	0.451623	0.000546323	903	52.32
ENSG00000119866	BCL11A	0.473013	0.000547945	103947	44.77
ENSG00000146007	ZMAT2	0.436287	0.000551916	8006	43.69
ENSG00000187257	RSBN1L	0.450352	0.000554504	86563	39.26
ENSG00000150867	PIP4K2A	0.422248	0.000557942	179724	41.89
ENSG00000159884	CCDC107	0.469868	0.000561815	3221	52.82
ENSG00000173581	CCDC106	0.459814	0.000561815	12099	61.17
ENSG00000160613	PCSK7	0.426068	0.000561815	28188	50.91
ENSG00000113758	DBN1	0.419481	0.000561815	17793	59.54
ENSG00000124795	DEK	0.428276	0.000565065	40688	39.15
ENSG00000136158	SPRY2	0.434056	0.00056552	5150	49.06
ENSG00000167874	TMEM88	0.490303	0.00056631	1033	63.06
ENSG00000092929	UNC13D	0.441629	0.000568849	17492	59.67
ENSG00000136240	KDELR2	0.451605	0.000572051	38237	46.74
ENSG00000049247	UTS2	0.436998	0.00057405	10429	40.81
ENSG00000138166	DUSP5	0.468194	0.000575566	13626	49.03
ENSG00000188603	CLN3	0.4612	0.000576337	21464	50.61
ENSG00000115548	KDM3A	0.424859	0.000576511	52069	40.15
ENSG00000197147	LRRC8B	0.424075	0.000576511	73028	38.63
ENSG00000102886	GDPD3	0.41107	0.000582506	8727	53.57
ENSG00000169902	TPST1	0.43332	0.00058265	215226	42.21
ENSG00000090432	MUL1	0.461223	0.000583253	8703	47.5
ENSG00000117139	KDM5B	0.532735	0.00058492	83992	41.04
ENSG00000186204	CYP4F12	0.437113	0.000594682	24156	45.84
ENSG00000144741	SLC25A26	0.43056	0.000596861	254506	40.15
ENSG00000146540	C7orf50	0.438976	0.000597906	141274	57.69
ENSG00000182173	TSEN54	0.448314	0.000603178	8675	54.69
ENSG00000118046	STK11	0.417456	0.000605055	50873	57.49
ENSG00000015171	ZMYND11	0.434266	0.000609358	120172	37.8
ENSG00000137403	HLA-F	0.440067	0.000610498	15743	45.02
ENSG00000145428	RNF175	0.428403	0.000612683	49864	41
ENSG00000170190	SLC16A5	0.451879	0.000615604	18435	56.22
ENSG00000081019	RSBN1	0.446543	0.000616041	50644	37.22
ENSG00000168071	CCDC88B	0.442408	0.000616041	17330	61.62
ENSG00000179409	GEMIN4	0.453318	0.000616113	9578	56.14
ENSG00000177674	AGTRAP	0.447622	0.000616355	18718	54.37
ENSG00000171488	LRRC8C	0.435112	0.000616986	136831	39.69
ENSG00000167645	YIF1B	0.460076	0.000617735	13715	56.12
ENSG00000109270	LAMTOR3	0.436341	0.000621482	16092	34.87
ENSG00000145220	LYAR	0.456399	0.00062414	22453	44
ENSG00000117115	PADI2	0.471072	0.000625455	52690	51.75
ENSG00000136950	ARPC5L	0.457735	0.000629221	15603	52.55
ENSG00000125780	TGM3	0.456768	0.000629221	45078	47.92
ENSG00000144895	EIF2A	0.442166	0.000629821	39338	37.63
ENSG00000145868	FBXO38	0.429953	0.000629981	58901	37.05
ENSG00000158985	CDC42SE2	0.443359	0.000630816	152954	39.71
ENSG00000102804	TSC22D1	0.448412	0.0006312	145004	38.08
ENSG00000176624	MEX3C	0.493543	0.000633865	43754	41.02
ENSG00000076928	ARHGEF1	0.417207	0.000637671	46977	58.24
ENSG00000196329	GIMAP5	0.4604	0.000649515	27780	43.79
ENSG00000112110	MRPL18	0.424863	0.000649515	8624	43.85
ENSG00000160285	LSS	0.430407	0.000650397	40683	53.33
ENSG00000146859	TMEM140	0.488757	0.000651272	18143	43.02
ENSG00000064607	SUGP2	0.422647	0.000651556	43135	50
ENSG00000167851	CD300A	0.43941	0.000652096	18395	52.04
ENSG00000066084	DIP2B	0.457638	0.000654795	243672	41.84
ENSG00000104957	CCDC130	0.408932	0.000657094	31536	50.36
ENSG00000135316	SYNCRIP	0.413262	0.000660004	36007	40.05
ENSG00000102901	CENPT	0.460397	0.000661559	19654	53.77
ENSG00000175221	MED16	0.421198	0.000661748	25588	62.67
ENSG00000175471	MCTP1	0.408629	0.000665491	580834	37.29
ENSG00000152242	C18orf25	0.452305	0.000667675	93439	40.58
ENSG00000103522	IL21R	0.423684	0.000673814	49868	47.1
ENSG00000163659	TIPARP	0.430784	0.000674268	33535	38.27
ENSG00000131069	ACSS2	0.45889	0.000682664	55816	45.42
ENSG00000136842	TMOD1	0.439744	0.000683689	100563	46.76
ENSG00000235443	ZNRD1	0.421876	0.000692356	6004	41.5
ENSG00000109466	KLHL2	0.410851	0.000692586	115595	38.17
ENSG00000172331	BPGM	0.450901	0.000695043	33005	39.66
ENSG00000167434	CA4	0.421655	0.000695096	20957	54.97
ENSG00000103966	EHD4	0.452159	0.000696212	76624	47.1
ENSG00000112799	LY86	0.417546	0.000696265	66875	44.39
ENSG00000240972	MIF	0.430519	0.000696681	844	69.82
ENSG00000162783	IER5	0.453259	0.00069759	4200	49.77
ENSG00000060982	BCAT1	0.418299	0.000699827	139077	40.01
ENSG00000138593	SECISBP2L	0.416356	0.000714404	57971	36.73
ENSG00000179588	ZFPM1	0.482444	0.000715254	83751	63.06
ENSG00000198816	ZNF358	0.434291	0.000715613	5733	60.97
ENSG00000164512	ANKRD55	0.451964	0.000719133	133650	41.57
ENSG00000138795	LEF1	0.436896	0.000719758	121411	40.02
ENSG00000107223	EDF1	0.42188	0.000722342	4189	57.83
ENSG00000256043	CTSO	0.442375	0.000726188	29748	38.25
ENSG00000092010	PSME1	0.442459	0.000729493	2804	57.43
ENSG00000173264	GPR137	0.440192	0.000729493	19438	56.27
ENSG00000172115	CYCS	0.430497	0.000732257	6604	42.41
ENSG00000160959	LRRC14	0.41181	0.000734093	7180	63.18
ENSG00000074590	NUAK1	0.44006	0.000736914	76693	45.97
ENSG00000004864	SLC25A13	0.438693	0.000738783	201927	39.76
ENSG00000176533	GNG7	0.424132	0.000740775	191475	52.24
ENSG00000139890	REM2	0.428779	0.000743362	4456	56.14
ENSG00000143416	SELENBP1	0.429682	0.0007443	8403	54.97
ENSG00000102103	PQBP1	0.423023	0.000753999	12946	54.41
ENSG00000146576	C7orf26	0.42164	0.000753999	18705	53.1
ENSG00000171467	ZNF318	0.420893	0.000757141	62513	43.02
ENSG00000168101	NUDT16L1	0.385867	0.000757141	2165	65.05
ENSG00000135046	ANXA1	0.420642	0.000763972	18528	34.68
ENSG00000108960	MMD	0.437186	0.000765755	29302	40.95
ENSG00000163788	SNRK	0.432443	0.000765755	138252	41.92
ENSG00000145293	ENOPH1	0.449762	0.000771048	30587	43.12
ENSG00000166266	CUL5	0.432318	0.000773881	98863	39.36
ENSG00000160714	UBE2Q1	0.407076	0.000775453	10451	50.99
ENSG00000120063	GNA13	0.420468	0.000776277	47451	40.06
ENSG00000100288	CHKB	0.409548	0.000778413	22496	50.64
ENSG00000171867	PRNP	0.447837	0.000779481	15240	41.8
ENSG00000066294	CD84	0.415529	0.000784911	38421	41.6
ENSG00000163902	RPN1	0.39512	0.000787337	61106	46.98
ENSG00000186074	CD300LF	0.414893	0.000790538	18667	48.69
ENSG00000135631	RAB11FIP5	0.42511	0.000797662	83339	48.58
ENSG00000168300	PCMTD1	0.444877	0.000798201	81611	36.74
ENSG00000104490	NCALD	0.452175	0.000801221	438365	40.58
ENSG00000146828	SLC12A9	0.430351	0.000814187	40190	51.93
ENSG00000115267	IFIH1	0.432879	0.000816151	51610	35.75
ENSG00000125753	VASP	0.42993	0.000817878	20404	54.67
ENSG00000119655	NPC2	0.436454	0.00081953	17985	43.65
ENSG00000012223	LTF	0.454732	0.000819574	49589	46.95
ENSG00000008394	MGST1	0.420554	0.000820621	262117	36.94
ENSG00000106460	TMEM106B	0.431453	0.000821693	32097	34.58
ENSG00000127948	POR	0.441297	0.000822382	87655	50.98
ENSG00000090013	BLVRB	0.434212	0.000823044	17999	49.72
ENSG00000146094	DOK3	0.421164	0.000825566	9367	58.13
ENSG00000243279	PRAF2	0.432603	0.00082998	2841	60.73
ENSG00000146021	KLHL3	0.414981	0.00083175	118589	42.71
ENSG00000228960	OR2A9P	0.459805	0.00083678	6454	42.12
ENSG00000135686	KLHL36	0.394014	0.000841045	19175	51.32
ENSG00000115107	STEAP3	0.413843	0.000844711	41821	51.67
ENSG00000105698	USF2	0.407827	0.000844711	10859	57.37
ENSG00000103490	PYCARD	0.454205	0.000845925	1964	61.88
ENSG00000159339	PADI4	0.441	0.000845925	55809	49.06
ENSG00000104805	NUCB1	0.423111	0.000845925	23060	52.75
ENSG00000088826	SMOX	0.425719	0.000851677	66767	49.87
ENSG00000080503	SMARCA2	0.404476	0.00085797	213334	40.37
ENSG00000185085	INTS5	0.443917	0.000859677	6454	54.61
ENSG00000150540	HNMT	0.416784	0.000863043	52344	36.83
ENSG00000166927	MS4A7	0.436229	0.000864111	17466	40.71
ENSG00000130165	ELOF1	0.428751	0.000867525	8089	55.91
ENSG00000078487	ZCWPW1	0.435243	0.000868714	28166	44.82
ENSG00000135077	HAVCR2	0.454462	0.000871291	57037	42.36
ENSG00000176595	KBTBD11	0.481777	0.000878925	33259	50.37
ENSG00000148468	FAM171A1	0.416522	0.00088053	159646	45.04
ENSG00000091009	RBM27	0.422003	0.000881705	85618	38.67
ENSG00000164849	GPR146	0.437908	0.000885866	14715	58.77
ENSG00000167083	GNGT2	0.484725	0.00088596	7783	49.96
ENSG00000115756	HPCAL1	0.427639	0.000889133	124728	52.12
ENSG00000092203	TOX4	0.399462	0.000892444	22578	43.81
ENSG00000121749	TBC1D15	0.433224	0.000897804	87541	37.01
ENSG00000139218	SCAF11	0.436371	0.000907377	72989	36.52
ENSG00000173145	NOC3L	0.431852	0.000914415	29733	37.01
ENSG00000147394	ZNF185	0.442329	0.00092059	59038	50.51
ENSG00000103168	TAF1C	0.424946	0.000923782	9223	59.13
ENSG00000136869	TLR4	0.402695	0.000934909	20560	38.47
ENSG00000056972	TRAF3IP2	0.42907	0.000940475	51525	44.49
ENSG00000054654	SYNE2	0.425473	0.000941263	464534	41.08
ENSG00000143727	ACP1	0.465287	0.000943655	14143	42.67
ENSG00000174606	ANGEL2	0.451724	0.000943655	23685	38.71
ENSG00000083937	CHMP2B	0.401714	0.000943655	28285	34.77
ENSG00000087087	SRRT	0.44488	0.000943955	13561	53.16
ENSG00000168970	JMJD7-PLA2G4B	0.384503	0.000944618	20060	57.7
ENSG00000125952	MAX	0.406865	0.000947768	96521	44.69
ENSG00000198931	APRT	0.422946	0.000948494	2598	64.29
ENSG00000115310	RTN4	0.40472	0.000948494	140434	38.6
ENSG00000149084	HSD17B12	0.448025	0.000949538	175937	38.14
ENSG00000123405	NFE2	0.432768	0.000949758	8904	51.75
ENSG00000112701	SENP6	0.417258	0.000949758	116772	37.44
ENSG00000169738	DCXR	0.440123	0.000951088	2573	62
ENSG00000073584	SMARCE1	0.451065	0.000956493	23692	37.88
ENSG00000138381	ASNSD1	0.41039	0.00097101	9446	37.75
ENSG00000168710	AHCYL1	0.459297	0.000973967	38977	40.92
ENSG00000141447	OSBPL1A	0.422759	0.000975715	235835	40.87
ENSG00000182923	CEP63	0.41401	0.000982127	89296	38.5
ENSG00000160767	FAM189B	0.430646	0.000983158	8278	57.4
ENSG00000101695	RNF125	0.472126	0.000983686	54394	42.32
ENSG00000171435	KSR2	0.428208	0.000983686	515978	44.66
ENSG00000152689	RASGRP3	0.424458	0.000983686	128426	40.76
ENSG00000161911	TREML1	0.474303	0.000985511	4995	50.72
ENSG00000103257	SLC7A5	0.44238	0.000986846	39484	58.42
ENSG00000089775	ZBTB25	0.467414	0.000988478	56107	42.25
ENSG00000147872	PLIN2	0.396581	0.000990912	40915	44.99
ENSG00000164674	SYTL3	0.449808	0.000991929	114862	46.02
ENSG00000139668	WDFY2	0.429283	0.000991929	183254	39.68
ENSG00000240344	PPIL3	0.427881	0.000991929	18396	41.39
ENSG00000257923	CUX1	0.431643	0.000993258	468054	48.61
ENSG00000173083	HPSE	0.470251	0.000994223	42692	41.22
ENSG00000137841	PLCB2	0.446671	0.000994223	29759	56.84
ENSG00000153914	SREK1	0.418144	0.000995183	43644	35.5
ENSG00000099949	LZTR1	0.426585	0.000997796	16763	58.23
ENSG00000189339	SLC35E2B	0.386838	0.000997796	33266	53.57
ENSG00000187764	SEMA4D	0.456829	0.000998655	137343	51.34
ENSG00000058673	ZC3H11A	0.396392	0.000999697	59345	40.73
ENSG00000121680	PEX16	0.394822	0.00100041	9149	58.01
ENSG00000161013	MGAT4B	0.421021	0.00101048	9355	64.04
ENSG00000167280	ENGASE	0.414903	0.00101048	13775	58.56
ENSG00000108244	KRT23	0.427959	0.00101504	14946	41.6
ENSG00000196511	TPK1	0.415765	0.00101512	384454	37.29
ENSG00000205572	SERF1B	0.420842	0.00101936	17866	43.63
ENSG00000134242	PTPN22	0.424853	0.00102091	57942	38.85
ENSG00000063854	HAGH	0.414521	0.00102323	31537	53.32
ENSG00000267453	CLEC4O	0.424165	0.00102355	12911	47.42
ENSG00000171840	NINJ2	0.419937	0.00102355	99483	48.05
ENSG00000184164	CRELD2	0.427052	0.00102935	9373	59.36
ENSG00000102879	CORO1A	0.420441	0.00103688	6249	64.42
ENSG00000152804	HHEX	0.426245	0.00103871	5692	46.36
ENSG00000114648	KLHL18	0.42731	0.00104916	63899	44.87
ENSG00000128791	TWSG1	0.444866	0.00105496	67653	38.45
ENSG00000236287	ZBED5	0.429021	0.00105496	46722	40.77
ENSG00000049089	COL9A2	0.447186	0.00105915	17324	57.43
ENSG00000131408	NR1H2	0.424045	0.00105915	53735	51.29
ENSG00000125257	ABCC4	0.415659	0.00105915	281640	42.34
ENSG00000175463	TBC1D10C	0.390067	0.00105923	6174	61.91
ENSG00000115524	SF3B1	0.41229	0.00106639	46564	39.44
ENSG00000089692	LAG3	0.452215	0.00106663	5943	57.37
ENSG00000140093	SERPINA10	0.409988	0.00107051	12808	44.67
ENSG00000177628	GBA	0.424065	0.001073	10247	51.52
ENSG00000161040	FBXL13	0.423879	0.00107801	261613	39.83
ENSG00000134243	SORT1	0.424554	0.00108248	88350	42.26
ENSG00000184277	TM2D3	0.430394	0.00108998	30947	40.91
ENSG00000213923	CSNK1E	0.412721	0.00108998	27393	55.79
ENSG00000105352	CEACAM4	0.411823	0.00108998	8103	54.13
ENSG00000145022	TCTA	0.407396	0.00109542	4269	53.23
ENSG00000175110	MRPS22	0.442218	0.0010965	351417	42.84
ENSG00000185475	TMEM179B	0.402548	0.0011112	2998	52.82
ENSG00000197563	PIGN	0.473118	0.00111313	281863	38.03
ENSG00000185101	ANO9	0.407598	0.00111848	24078	59.43
ENSG00000116786	PLEKHM2	0.434469	0.0011271	50449	52.01
ENSG00000101104	PABPC1L	0.3827	0.0011271	48975	47.22
ENSG00000152784	PRDM8	0.465198	0.00112862	20450	47.9
ENSG00000167699	GLOD4	0.428052	0.00113077	26293	45.54
ENSG00000155959	VBP1	0.410717	0.00113649	42834	40.41
ENSG00000174953	DHX36	0.419365	0.00114199	51941	35.49
ENSG00000165671	NSD1	0.437769	0.00114465	167190	42.34
ENSG00000120694	HSPH1	0.415594	0.00114776	27415	36.81
ENSG00000119431	HDHD3	0.441832	0.00115077	3580	54.87
ENSG00000107581	EIF3A	0.422017	0.00115077	47153	41.68
ENSG00000161914	ZNF653	0.419385	0.00115163	22412	55.65
ENSG00000186417	GLDN	0.404712	0.00115163	66350	44.75
ENSG00000100307	CBX7	0.398591	0.00115626	32513	54.25
ENSG00000179921	GPBAR1	0.412291	0.00116811	4365	58.82
ENSG00000198336	MYL4	0.406941	0.00116915	23233	45.91
ENSG00000141293	SKAP1	0.436244	0.00117013	296833	39.13
ENSG00000158578	ALAS2	0.407597	0.00117071	21922	43.13
ENSG00000136478	TEX2	0.422521	0.00117263	116074	43.58
ENSG00000159176	CSRP1	0.424366	0.00119757	25926	50.68
ENSG00000167792	NDUFV1	0.449203	0.00120057	6901	56.2
ENSG00000151690	MFSD6	0.411703	0.00120057	100850	39.84
ENSG00000187239	FNBP1	0.408652	0.00120057	156007	43.76
ENSG00000176102	CSTF3	0.405932	0.00120057	85183	37.22
ENSG00000138764	CCNG2	0.42828	0.00120499	276181	43.18
ENSG00000134250	NOTCH2	0.41674	0.00121628	189226	40
ENSG00000148019	CEP78	0.440265	0.0012211	43628	37.2
ENSG00000157954	WIPI2	0.436238	0.0012211	43644	48.21
ENSG00000170619	COMMD5	0.421649	0.00122173	12694	53.13
ENSG00000242372	EIF6	0.43262	0.00122898	6074	52.05
ENSG00000145476	CYP4V2	0.422403	0.00122898	21896	42.07
ENSG00000007968	E2F2	0.40899	0.00122996	24795	51.65
ENSG00000182853	VMO1	0.420838	0.00123169	1148	62.75
ENSG00000162607	USP1	0.425545	0.0012358	15507	39.48
ENSG00000131669	NINJ1	0.475026	0.00124243	12755	59.63
ENSG00000167676	PLIN4	0.42937	0.00124287	16285	59.39
ENSG00000135241	PNPLA8	0.386356	0.00124287	99249	37.75
ENSG00000179526	SHARPIN	0.405196	0.00126536	9491	60.75
ENSG00000105393	BABAM1	0.402114	0.00126838	13873	52.47
ENSG00000197329	PELI1	0.407746	0.00127057	51768	36.89
ENSG00000072609	CHFR	0.406152	0.0012789	134117	48.69
ENSG00000105993	DNAJB6	0.401504	0.00128133	82058	48.15
ENSG00000136286	MYO1G	0.415263	0.00128158	16426	59.09
ENSG00000035664	DAPK2	0.403625	0.00129572	164997	46.89
ENSG00000106789	CORO2A	0.439722	0.00129778	71662	49.15
ENSG00000235750	KIAA0040	0.435988	0.00129802	36013	44.87
ENSG00000012983	MAP4K5	0.401161	0.00130624	142625	37.27
ENSG00000135018	UBQLN1	0.409014	0.00131028	47990	38.64
ENSG00000215440	NPEPL1	0.402764	0.00131168	30107	56.79
ENSG00000104321	TRPA1	0.414551	0.00131702	55667	36.35
ENSG00000163519	TRAT1	0.432922	0.00133205	32235	36.43
ENSG00000104852	SNRNP70	0.394438	0.00133447	23186	53.38
ENSG00000051009	FAM160A2	0.389873	0.00133644	23366	44.55
ENSG00000160360	GPSM1	0.429958	0.00133678	32129	66.05
ENSG00000171791	BCL2	0.415014	0.00134095	196782	42.74
ENSG00000138709	LARP1B	0.40803	0.00134698	161645	39.1
ENSG00000030582	GRN	0.430284	0.00134879	7860	57.73
ENSG00000158869	FCER1G	0.400664	0.00134879	5465	49.29
ENSG00000185722	ANKFY1	0.393266	0.00134879	100174	44.9
ENSG00000122515	ZMIZ2	0.415474	0.00135017	21300	56.51
ENSG00000140299	BNIP2	0.432818	0.00135388	30388	38.55
ENSG00000113303	BTNL8	0.427084	0.00135388	51829	40.46
ENSG00000171316	CHD7	0.414661	0.00135388	189288	39.99
ENSG00000196776	CD47	0.452432	0.00135467	48771	37.38
ENSG00000114744	COMMD2	0.424369	0.00135467	14023	37.9
ENSG00000203618	GP1BB	0.430651	0.00135798	1232	72.34
ENSG00000239306	RBM14	0.38515	0.00135965	13308	49.61
ENSG00000155366	RHOC	0.480687	0.00135971	6307	57.2
ENSG00000165494	PCF11	0.418766	0.00136108	30463	38.25
ENSG00000166012	TAF1D	0.406153	0.00136902	54443	41.79
ENSG00000008300	CELSR3	0.425666	0.00137044	26423	59.87
ENSG00000116670	MAD2L2	0.401891	0.00137044	17170	53.91
ENSG00000157350	ST3GAL2	0.411057	0.00137455	63260	51.87
ENSG00000131899	LLGL1	0.416666	0.00137656	19240	59.81
ENSG00000175137	SH3BP5L	0.431316	0.00137772	15469	52.13
ENSG00000142733	MAP3K6	0.414528	0.00137772	12894	59.88
ENSG00000110077	MS4A6A	0.403009	0.00137772	12652	40.17
ENSG00000142687	KIAA0319L	0.400813	0.00137784	124458	41.89
ENSG00000146192	FGD2	0.423821	0.00138164	23423	53.53
ENSG00000198734	F5	0.418519	0.0013858	74637	38.05
ENSG00000005486	RHBDD2	0.396932	0.00139126	46324	47.79
ENSG00000170540	ARL6IP1	0.400365	0.00140165	9903	40.64
ENSG00000085832	EPS15	0.426443	0.0014067	165003	38.04
ENSG00000112406	HECA	0.402992	0.0014067	45722	41.8
ENSG00000010256	UQCRC1	0.42662	0.0014069	11974	53.04
ENSG00000204160	ZDHHC18	0.425409	0.0014069	30916	51.6
ENSG00000143851	PTPN7	0.411824	0.00140789	14575	52.92
ENSG00000167325	RRM1	0.396548	0.00140956	44225	40.37
ENSG00000133789	SWAP70	0.430243	0.00141634	88916	39.97
ENSG00000059377	TBXAS1	0.427564	0.00141639	243274	44.8
ENSG00000125814	NAPB	0.409106	0.00142133	47000	40.72
ENSG00000205755	CRLF2	0.399925	0.00142614	25174	46.96
ENSG00000107758	PPP3CB	0.427452	0.0014276	59596	38.91
ENSG00000135119	RNFT2	0.432691	0.00142854	115453	47.15
ENSG00000115282	TTC31	0.415576	0.00142854	11486	50.92
ENSG00000176087	SLC35A4	0.404017	0.00142854	4272	53.69
ENSG00000123933	MXD4	0.400789	0.00142868	14677	62.79
ENSG00000123091	RNF11	0.435265	0.00143285	37174	41.24
ENSG00000144136	SLC20A1	0.402109	0.00143503	17886	42.28
ENSG00000177058	SLC38A9	0.395481	0.00145184	147349	38.77
ENSG00000139372	TDG	0.441892	0.00145704	23052	40.64
ENSG00000173085	COQ2	0.390392	0.00145704	23378	39.35
ENSG00000124762	CDKN1A	0.423481	0.00145806	10877	54.41
ENSG00000196655	TRAPPC4	0.410762	0.00145806	6691	48.86
ENSG00000157978	LDLRAP1	0.422082	0.00146396	25280	54.6
ENSG00000079257	LXN	0.404132	0.00146396	26826	36.91
ENSG00000178252	WDR6	0.440464	0.00147083	8891	56.28
ENSG00000166169	POLL	0.388443	0.00147203	9388	52.96
ENSG00000022567	SLC45A4	0.417915	0.00147838	101139	52.64
ENSG00000027075	PRKCH	0.429687	0.00147879	363417	42.48
ENSG00000083812	ZNF324	0.423302	0.00147879	8391	57.75
ENSG00000134287	ARF3	0.438534	0.0014872	21764	47.69
ENSG00000125510	OPRL1	0.428985	0.0014872	20561	60.24
ENSG00000198286	CARD11	0.400314	0.00150172	137804	49.24
ENSG00000112139	MDGA1	0.417673	0.00150585	68627	52.18
ENSG00000122257	RBBP6	0.381328	0.00150592	35170	37.61
ENSG00000173327	MAP3K11	0.417463	0.00150827	17626	57.13
ENSG00000141873	SLC39A3	0.399483	0.00150976	7824	57.81
ENSG00000177370	TIMM22	0.399356	0.00151587	6542	48.66
ENSG00000178974	FBXO34	0.38555	0.00151749	90497	40.94
ENSG00000148180	GSN	0.40753	0.0015231	125049	46.87
ENSG00000168066	SF1	0.397286	0.0015231	14180	49.33
ENSG00000101945	SUV39H1	0.406611	0.00152312	13462	54.34
ENSG00000182606	TRAK1	0.380054	0.00152333	212088	44.94
ENSG00000184588	PDE4B	0.398094	0.00152598	582065	37.45
ENSG00000104522	TSTA3	0.402759	0.00153068	5430	65.11
ENSG00000104972	LILRB1	0.420829	0.00153691	20370	48.92
ENSG00000164535	DAGLB	0.418092	0.00154245	75064	48.19
ENSG00000100558	PLEK2	0.419177	0.00154812	25183	47.4
ENSG00000175806	MSRA	0.454351	0.0015536	374599	43.55
ENSG00000111726	CMAS	0.40643	0.00156405	19456	37.39
ENSG00000135905	DOCK10	0.467273	0.00156549	277355	39.37
ENSG00000197142	ACSL5	0.403603	0.00156549	54362	42.89
ENSG00000148411	NACC2	0.38414	0.00156598	88752	55.01
ENSG00000175416	CLTB	0.437224	0.00156685	24114	53.09
ENSG00000198815	FOXJ3	0.392813	0.00156921	159338	38.57
ENSG00000116199	FAM20B	0.403963	0.00157386	50763	43.17
ENSG00000203485	INF2	0.428691	0.00157485	32929	63.24
ENSG00000119559	C19orf25	0.394059	0.00157485	18076	62.64
ENSG00000109743	BST1	0.39965	0.00157674	35248	43.46
ENSG00000133731	IMPA1	0.412219	0.0015864	29417	37.43
ENSG00000157017	GHRL	0.39253	0.00159006	7281	53.43
ENSG00000159055	MIS18A	0.413373	0.00159666	10821	40.71
ENSG00000146281	PM20D2	0.411573	0.00159666	19510	39.6
ENSG00000137449	CPEB2	0.399041	0.00159843	67479	34.97
ENSG00000130150	MOSPD2	0.440761	0.00159904	48906	36.08
ENSG00000186265	BTLA	0.402785	0.00160054	35506	38.48
ENSG00000036672	USP2	0.398237	0.00160144	26496	54.63
ENSG00000184988	TMEM106A	0.400066	0.00160147	8206	50.69
ENSG00000168517	HEXIM2	0.397941	0.00161391	9340	53.43
ENSG00000010539	ZNF200	0.411283	0.00161666	13896	43.67
ENSG00000096433	ITPR3	0.419472	0.00162439	76209	55.13
ENSG00000108389	MTMR4	0.390557	0.00162439	28376	47.85
ENSG00000163516	ANKZF1	0.419158	0.00162544	6896	49.05
ENSG00000158796	DEDD	0.391673	0.00162594	11714	46.36
ENSG00000080822	CLDND1	0.414058	0.00162756	25154	38.91
ENSG00000132478	UNK	0.402356	0.00163785	40993	50.85
ENSG00000104774	MAN2B1	0.443949	0.0016393	20231	53.98
ENSG00000153064	BANK1	0.402804	0.0016419	663526	36.28
ENSG00000174738	NR1D2	0.402276	0.00164288	35331	40.67
ENSG00000142453	CARM1	0.401047	0.00164793	51522	54.29
ENSG00000111859	NEDD9	0.389997	0.0016491	199050	43.09
ENSG00000136717	BIN1	0.404565	0.00165894	59261	59.64
ENSG00000163577	EIF5A2	0.39471	0.00166237	20226	38.2
ENSG00000125827	TMX4	0.450379	0.00166429	42459	37.73
ENSG00000105854	PON2	0.435735	0.0016729	30467	38.28
ENSG00000077150	NFKB2	0.407191	0.0016729	8414	61.37
ENSG00000183255	PTTG1IP	0.419843	0.00167781	24318	51
ENSG00000099337	KCNK6	0.44615	0.00167851	12231	52.87
ENSG00000172270	BSG	0.422165	0.00168745	12216	62.58
ENSG00000111846	GCNT2	0.394813	0.00168745	137145	43.51
ENSG00000179262	RAD23A	0.395604	0.00168805	7787	54.44
ENSG00000198642	KLHL9	0.423042	0.00169046	5739	39.39
ENSG00000148334	PTGES2	0.382618	0.00169046	7769	59.55
ENSG00000125447	GGA3	0.441935	0.00169138	25764	51.82
ENSG00000133574	GIMAP4	0.392488	0.0016919	6584	44.07
ENSG00000105866	SP4	0.417314	0.00169313	86779	38.35
ENSG00000104643	MTMR9	0.397203	0.00170027	43330	37.53
ENSG00000092067	CEBPE	0.435904	0.00170326	2312	61
ENSG00000133313	CNDP2	0.401819	0.00171594	27638	51.18
ENSG00000149809	TM7SF2	0.393178	0.00171594	4563	60.12
ENSG00000170633	RNF34	0.442271	0.00171959	30582	43.68
ENSG00000148384	INPP5E	0.371504	0.00171959	11226	63.09
ENSG00000153827	TRIP12	0.391218	0.00172323	159401	38.19
ENSG00000037757	MRI1	0.40144	0.00173396	9760	52.2
ENSG00000140416	TPM1	0.422142	0.00173408	29283	45.06
ENSG00000125888	BANF2	0.39455	0.00173408	42199	47.87
ENSG00000153162	BMP6	0.413875	0.00174374	155629	43.48
ENSG00000243646	IL10RB	0.421954	0.00174409	43820	46.78
ENSG00000163681	SLMAP	0.392648	0.00174409	174553	38.92
ENSG00000162980	ARL5A	0.416828	0.00174585	39508	37.35
ENSG00000027869	SH2D2A	0.400157	0.00174602	10619	55.56
ENSG00000105953	OGDH	0.409748	0.0017471	102494	46.23
ENSG00000167635	ZNF146	0.399117	0.00175036	24172	42.84
ENSG00000158062	UBXN11	0.438947	0.00175154	37035	53.25
ENSG00000066027	PPP2R5A	0.395594	0.0017517	76443	39.33
ENSG00000181788	SIAH2	0.422509	0.00175215	22352	44.98
ENSG00000170873	MTSS1	0.415546	0.00175378	177639	45.65
ENSG00000019995	ZRANB1	0.423407	0.00176116	46066	39.68
ENSG00000198818	SFT2D1	0.401318	0.00176546	22848	43.21
ENSG00000132669	RIN2	0.43076	0.00177275	244853	44.28
ENSG00000076770	MBNL3	0.429037	0.00177275	120651	36.96
ENSG00000174151	CYB561D1	0.422002	0.00177275	8880	52.44
ENSG00000164597	COG5	0.387398	0.00177275	362959	37.1
ENSG00000144749	LRIG1	0.440549	0.00177612	122466	46.07
ENSG00000178057	NDUFAF3	0.392243	0.00177695	3036	64.14
ENSG00000167065	DUSP18	0.433813	0.00178467	15839	47.98
ENSG00000104142	VPS18	0.429369	0.00179146	9525	53.56
ENSG00000163320	CGGBP1	0.416377	0.00179225	97941	35.99
ENSG00000108309	RUNDC3A	0.382801	0.00179254	10257	59.03
ENSG00000112182	BACH2	0.419944	0.00179311	370380	40.5
ENSG00000221829	FANCG	0.407509	0.00179311	6107	53.03
ENSG00000102854	MSLN	0.386687	0.00179781	8131	66.92
ENSG00000213937	CLDN9	0.428777	0.00179897	1582	64.5
ENSG00000183044	ABAT	0.422277	0.00181147	109979	47.34
ENSG00000100055	CYTH4	0.408118	0.00181582	33314	55.44
ENSG00000104517	UBR5	0.408192	0.00181692	160486	38.31
ENSG00000119812	FAM98A	0.385769	0.00182487	15722	37.54
ENSG00000029363	BCLAF1	0.399785	0.00182981	33224	35.59
ENSG00000167671	UBXN6	0.391946	0.00184069	12795	60
ENSG00000068878	PSME4	0.409328	0.00185339	106924	38.04
ENSG00000105726	ATP13A1	0.419955	0.00185777	18478	57.96
ENSG00000166855	CLPX	0.389356	0.00186878	37123	40
ENSG00000062194	GPBP1	0.397825	0.00188073	90731	40.02
ENSG00000126860	EVI2A	0.412983	0.00188346	4324	33.34
ENSG00000153551	CMTM7	0.38541	0.00188346	91369	45.15
ENSG00000100109	TFIP11	0.446568	0.00188633	21280	44.89
ENSG00000131467	PSME3	0.430346	0.00188633	19375	46.03
ENSG00000206177	HBM	0.400291	0.00189521	12872	58.25
ENSG00000132952	USPL1	0.40247	0.00189892	43077	38.94
ENSG00000201772	SNORA5C	0.383427	0.00189892	136	59.12
ENSG00000198961	PJA2	0.437948	0.00189993	75261	37.65
ENSG00000118508	RAB32	0.374542	0.00189993	11120	38.94
ENSG00000116809	ZBTB17	0.390537	0.00190006	34263	51.22
ENSG00000126602	TRAP1	0.391522	0.00190195	65914	50.86
ENSG00000105722	ERF	0.418054	0.00190967	7559	64.05
ENSG00000102125	TAZ	0.412495	0.00191057	10202	56.1
ENSG00000077585	GPR137B	0.406471	0.00191779	79360	43.63
ENSG00000001629	ANKIB1	0.406464	0.001933	155409	36.83
ENSG00000144485	HES6	0.417184	0.00193396	2395	70.08
ENSG00000124702	KLHDC3	0.416156	0.00193396	7195	52.39
ENSG00000184992	BRI3BP	0.408126	0.00193404	37586	48.37
ENSG00000163877	SNIP1	0.38289	0.0019429	19844	43.19
ENSG00000115053	NCL	0.390702	0.00194835	30110	47.89
ENSG00000197114	ZGPAT	0.410237	0.00196315	28677	49.61
ENSG00000204165	CXorf65	0.396132	0.00196315	2899	48.97
ENSG00000174744	BRMS1	0.388498	0.00196315	7792	55.88
ENSG00000283777	CANX	0.416289	0.00198436	52902	45.61
ENSG00000116685	KIAA2013	0.401034	0.00198625	6837	55.79
ENSG00000113532	ST8SIA4	0.410506	0.00198842	96349	34.13
ENSG00000005513	SOX8	0.402119	0.00200037	5209	64.99
ENSG00000162654	GBP4	0.438086	0.00200598	17798	38.84
ENSG00000181826	RELL1	0.406271	0.00200598	95576	42.83
ENSG00000136929	HEMGN	0.397476	0.00200695	18065	39.24
ENSG00000163703	CRELD1	0.366675	0.00200754	11590	51.58
ENSG00000137462	TLR2	0.37947	0.00201014	21632	38.89
ENSG00000114209	PDCD10	0.40016	0.0020106	51641	35.73
ENSG00000197965	MPZL1	0.452765	0.00201195	70727	41.24
ENSG00000142046	TMEM91	0.409075	0.00201195	33172	52.68
ENSG00000129757	CDKN1C	0.427971	0.00201711	2560	67.55
ENSG00000107372	ZFAND5	0.413071	0.00202025	13822	39.89
ENSG00000142409	ZNF787	0.406749	0.00202025	33929	58.61
ENSG00000118503	TNFAIP3	0.395068	0.00202484	16098	43.95
ENSG00000204010	IFIT1B	0.423603	0.00202664	7149	43.27
ENSG00000162231	NXF1	0.393678	0.00202921	14179	50.07
ENSG00000139117	CPNE8	0.404238	0.00203016	260608	36.06
ENSG00000136261	BZW2	0.421518	0.00203166	60392	37.77
ENSG00000143772	ITPKB	0.401805	0.00204419	107633	49.82
ENSG00000137070	IL11RA	0.368148	0.00204419	11200	54.18
ENSG00000134453	RBM17	0.411519	0.00204638	28423	41.2
ENSG00000137411	VARS2	0.408748	0.00204885	12254	54.92
ENSG00000125877	ITPA	0.393311	0.00204949	15002	50.89
ENSG00000158006	PAFAH2	0.423998	0.0020528	38350	45.67
ENSG00000228474	OST4	0.39196	0.0020528	1182	54.69
ENSG00000168229	PTGDR	0.435186	0.00205677	9026	43.93
ENSG00000107968	MAP3K8	0.393306	0.00207064	27812	42.62
ENSG00000112294	ALDH5A1	0.417429	0.00207596	42340	43.1
ENSG00000101082	SLA2	0.42327	0.0020811	33878	50.42
ENSG00000125249	RAP2A	0.421797	0.0020811	34959	36.13
ENSG00000126264	HCST	0.426984	0.0020843	1848	58.73
ENSG00000102871	TRADD	0.417995	0.00209171	5724	58.67
ENSG00000071894	CPSF1	0.389233	0.00209176	16106	59.96
ENSG00000157107	FCHO2	0.379749	0.00209176	134481	37.02
ENSG00000148832	PAOX	0.382337	0.00209415	12433	52.74
ENSG00000154229	PRKCA	0.414362	0.00210415	508130	43.87
ENSG00000145020	AMT	0.379552	0.00210671	5907	54.4
ENSG00000254585	MAGEL2	0.380392	0.0021069	4318	61.17
ENSG00000239305	RNF103	0.391676	0.00211055	20468	39.04
ENSG00000129562	DAD1	0.370039	0.00211114	24317	41.9
ENSG00000162368	CMPK1	0.419992	0.00212852	45042	42.2
ENSG00000160796	NBEAL2	0.426249	0.00213047	30038	59.9
ENSG00000110446	SLC15A3	0.42036	0.00214247	15446	52.85
ENSG00000116830	TTF2	0.399821	0.00214384	47127	41.15
ENSG00000185651	UBE2L3	0.40992	0.00216795	74587	49.73
ENSG00000164136	IL15	0.403184	0.00217221	97404	37.14
ENSG00000172159	FRMD3	0.397345	0.00217385	295556	41.56
ENSG00000141424	SLC39A6	0.389363	0.00217435	20854	39.44
ENSG00000042493	CAPG	0.43063	0.00218663	23679	51.32
ENSG00000125868	DSTN	0.398934	0.00219468	39844	39.41
ENSG00000175073	VCPIP1	0.406008	0.00219817	38744	39.76
ENSG00000162496	DHRS3	0.375537	0.00219817	50300	51.33
ENSG00000100985	MMP9	0.403449	0.00220292	7653	56.94
ENSG00000144589	STK11IP	0.405667	0.00220754	18594	53.34
ENSG00000054965	FAM168A	0.416678	0.00220899	197702	41.55
ENSG00000087157	PGS1	0.383382	0.00221593	46465	52.04
ENSG00000184203	PPP1R2	0.434589	0.00222231	28958	39
ENSG00000116574	RHOU	0.39597	0.00222923	11185	45.48
ENSG00000145979	TBC1D7	0.401955	0.00225058	62041	44.56
ENSG00000233904	HLA-E	0.416136	0.00225684	4738	55.45
ENSG00000133742	CA1	0.414749	0.00225684	51406	37.14
ENSG00000196757	ZNF700	0.387352	0.00225684	25705	44.6
ENSG00000188243	COMMD6	0.402181	0.00225719	24220	40
ENSG00000136146	MED4	0.424413	0.0022654	41808	40.77
ENSG00000117054	ACADM	0.379211	0.0022654	63228	40.45
ENSG00000143297	FCRL5	0.382301	0.00226889	39138	42.98
ENSG00000151062	CACNA2D4	0.436337	0.00227468	126703	50.45
ENSG00000100567	PSMA3	0.400374	0.00227468	27169	40.28
ENSG00000150045	KLRF1	0.428186	0.00227491	17526	35.1
ENSG00000000419	DPM1	0.404117	0.0022779	23688	39.85
ENSG00000130414	NDUFA10	0.414453	0.00227868	132895	48.42
ENSG00000105255	FSD1	0.416458	0.00228223	19245	54.72
ENSG00000156515	HK1	0.381597	0.00228223	131900	47.64
ENSG00000101745	ANKRD12	0.41714	0.00228382	149757	37.33
ENSG00000151461	UPF2	0.389037	0.002284	123148	40.23
ENSG00000100490	CDKL1	0.383835	0.00228905	87057	43.04
ENSG00000142459	EVI5L	0.390331	0.00229753	34743	58.04
ENSG00000196937	FAM3C	0.377703	0.00229877	47486	35.92
ENSG00000144224	UBXN4	0.393917	0.00231387	43322	39.75
ENSG00000147234	FRMPD3	0.434333	0.00232354	82801	45.11
ENSG00000124813	RUNX2	0.395481	0.00233716	336192	40.23
ENSG00000020129	NCDN	0.364314	0.00233909	9801	57.71
ENSG00000164292	RHOBTB3	0.416453	0.0023531	110861	40.56
ENSG00000184792	OSBP2	0.408013	0.00236029	214042	48.17
ENSG00000133142	TCEAL4	0.420469	0.00237439	11505	39.32
ENSG00000167600	CYP2S1	0.419435	0.00238081	14329	53.16
ENSG00000067836	ROGDI	0.403035	0.00238081	5912	63.01
ENSG00000137955	RABGGTB	0.421065	0.00239219	8889	37.85
ENSG00000211584	SLC48A1	0.394445	0.00239638	28835	52.68
ENSG00000112303	VNN2	0.400131	0.00239729	19589	39.35
ENSG00000113851	CRBN	0.394169	0.00239729	35099	37.25
ENSG00000154930	ACSS1	0.399203	0.00241249	52750	52
ENSG00000174720	LARP7	0.391335	0.00241551	20485	37.75
ENSG00000147862	NFIB	0.419933	0.00242085	317140	38.29
ENSG00000176390	CRLF3	0.41936	0.00242579	55304	42.4
ENSG00000155096	AZIN1	0.406515	0.00242579	67556	40.81
ENSG00000101972	STAG2	0.396853	0.00242579	462452	39.19
ENSG00000185198	PRSS57	0.448221	0.00242954	9952	56.94
ENSG00000175573	C11orf68	0.401327	0.00243569	2252	61.47
ENSG00000197077	KIAA1671	0.413478	0.00243998	244718	48.94
ENSG00000178694	NSUN3	0.419406	0.00244053	68852	38.03
ENSG00000143612	C1orf43	0.39469	0.00244945	13941	45.86
ENSG00000006715	VPS41	0.397117	0.00245998	209420	38.35
ENSG00000141526	SLC16A3	0.409996	0.00246506	32732	59.9
ENSG00000100325	ASCC2	0.377545	0.00247292	49695	48.94
ENSG00000104518	GSDMD	0.35885	0.00247871	9855	62.14
ENSG00000156313	RPGR	0.387636	0.00248081	58381	37.6
ENSG00000125637	PSD4	0.402304	0.00248941	52071	51.01
ENSG00000121741	ZMYM2	0.384487	0.00249967	133159	37.62
ENSG00000136213	CHST12	0.427362	0.00251563	44896	50.36
ENSG00000117984	CTSD	0.402687	0.00251563	11818	64.73
ENSG00000166333	ILK	0.397027	0.00251599	7166	49.78
ENSG00000091073	DTX2	0.411985	0.00252011	44319	54.28
ENSG00000072694	FCGR2B	0.380104	0.00252616	15507	47.24
ENSG00000148908	RGS10	0.42146	0.00252887	42902	49.42
ENSG00000136319	TTC5	0.380536	0.00255072	49402	39.83
ENSG00000121851	POLR3GL	0.421003	0.00255541	14158	44.92
ENSG00000078596	ITM2A	0.410991	0.00255834	7283	36.96
ENSG00000067900	ROCK1	0.385486	0.00256102	164907	36.91
ENSG00000132185	FCRLA	0.390724	0.00256348	7380	46.05
ENSG00000111875	ASF1A	0.413941	0.00258159	15019	39.18
ENSG00000112308	C6orf62	0.414155	0.00258184	15137	39.06
ENSG00000107560	RAB11FIP2	0.391012	0.00258184	42025	35.75
ENSG00000185432	METTL7A	0.372264	0.00258266	9038	42.86
ENSG00000132305	IMMT	0.379842	0.00258661	51838	41.41
ENSG00000145779	TNFAIP8	0.388048	0.00259608	130996	41.46
ENSG00000133561	GIMAP6	0.423382	0.00261905	7273	49.01
ENSG00000085365	SCAMP1	0.389083	0.00262703	120128	37.55
ENSG00000162366	PDZK1IP1	0.402074	0.00263375	7462	57.9
ENSG00000213639	PPP1CB	0.405606	0.00267329	51300	38.98
ENSG00000071553	ATP6AP1	0.388158	0.00267785	7871	56.75
ENSG00000102054	RBBP7	0.411974	0.00270204	31079	42.19
ENSG00000198586	TLK1	0.401137	0.00270204	240491	38.08
ENSG00000118197	DDX59	0.392808	0.00270363	46011	41.97
ENSG00000140025	EFCAB11	0.384579	0.00270772	160108	40
ENSG00000072042	RDH11	0.378717	0.00270893	18993	42.62
ENSG00000077549	CAPZB	0.401894	0.00271087	146764	49.21
ENSG00000148308	GTF3C5	0.395805	0.00271521	27828	51.81
ENSG00000198833	UBE2J1	0.443818	0.00272467	26097	39.93
ENSG00000103653	CSK	0.406457	0.00272815	21141	56.64
ENSG00000138246	DNAJC13	0.37877	0.0027335	121530	36.8
ENSG00000106868	SUSD1	0.388507	0.00273837	134514	42.75
ENSG00000186197	EDARADD	0.370437	0.00273837	154658	44.77
ENSG00000111237	VPS29	0.397625	0.00276459	11028	40.66
ENSG00000153563	CD8A	0.392212	0.00276607	23786	46.9
ENSG00000136870	ZNF189	0.39553	0.00276682	11787	39.9
ENSG00000170606	HSPA4	0.367412	0.00277339	54436	41.3
ENSG00000156049	GNA14	0.373623	0.00277427	225243	42.21
ENSG00000145715	RASA1	0.39103	0.00277515	124048	35.77
ENSG00000163156	SCNM1	0.371891	0.00279304	13632	48.32
ENSG00000196517	SLC6A9	0.37035	0.00279644	39967	56.44
ENSG00000188404	SELL	0.372482	0.00279862	21037	38.85
ENSG00000136872	ALDOB	0.412365	0.00280205	29104	40.95
ENSG00000112486	CCR6	0.402248	0.00281669	27889	45.54
ENSG00000137818	RPLP1	0.410511	0.00281892	3391	47.29
ENSG00000154237	LRRK1	0.397414	0.0028194	158930	45.99
ENSG00000198692	EIF1AY	0.414094	0.00282573	17378	35.59
ENSG00000099910	KLHL22	0.378892	0.00282682	54325	49.08
ENSG00000178691	SUZ12	0.405295	0.00282803	64031	41.01
ENSG00000181722	ZBTB20	0.392352	0.00282803	832770	36.07
ENSG00000145675	PIK3R1	0.375912	0.00282803	86065	39.2
ENSG00000119280	C1orf198	0.401744	0.00283871	32470	47.8
ENSG00000136573	BLK	0.385115	0.00284333	77705	46.62
ENSG00000185973	TMLHE	0.389757	0.00284483	180933	37.39
ENSG00000102145	GATA1	0.377912	0.0028483	7749	54.46
ENSG00000106780	MEGF9	0.392126	0.00285251	113659	38.18
ENSG00000236315	NCR3	0.417183	0.00285259	4090	51.85
ENSG00000164305	CASP3	0.388322	0.00285504	21813	40.48
ENSG00000144645	OSBPL10	0.419718	0.00286504	419690	42.45
ENSG00000136754	ABI1	0.397633	0.00286504	114494	38.44
ENSG00000182568	SATB1	0.380331	0.00288291	100211	36.42
ENSG00000124243	BCAS4	0.403944	0.0028878	87782	50.85
ENSG00000130287	NCAN	0.362193	0.00288926	40275	51.56
ENSG00000144867	SRPRB	0.421701	0.00289218	41749	41.15
ENSG00000196961	AP2A1	0.382319	0.00289584	40145	54.57
ENSG00000032444	PNPLA6	0.406537	0.00290518	27760	55.88
ENSG00000048462	TNFRSF17	0.386669	0.00291011	2858	40.26
ENSG00000146592	CREB5	0.389106	0.00291333	526573	40.7
ENSG00000100024	UPB1	0.383354	0.00291894	34283	49.88
ENSG00000196428	TSC22D2	0.407918	0.00291966	58096	36.52
ENSG00000106052	TAX1BP1	0.393838	0.00292184	105233	36.81
ENSG00000272034	SNORD14A	0.374428	0.00292754	90	42.86
ENSG00000165169	DYNLT3	0.371356	0.00292828	10814	37.43
ENSG00000172667	ZMAT3	0.408294	0.00292978	112094	39.67
ENSG00000138061	CYP1B1	0.408961	0.00293567	42929	44.41
ENSG00000169062	UPF3A	0.396424	0.00293586	24216	47.57
ENSG00000105610	KLF1	0.380143	0.00293867	2779	61.58
ENSG00000075651	PLD1	0.38431	0.00294941	210546	38.86
ENSG00000177508	IRX3	0.397876	0.00296379	3483	64.52
ENSG00000133246	PRAM1	0.436053	0.00296552	12584	57.07
ENSG00000106346	USP42	0.398634	0.00296552	56680	45.58
ENSG00000026950	BTN3A1	0.420106	0.00298442	12971	44.46
ENSG00000184470	TXNRD2	0.384522	0.00298682	66303	54.09
ENSG00000182718	ANXA2	0.369879	0.00298768	55749	44.95
ENSG00000162437	RAVER2	0.390331	0.0029914	88137	37.2
ENSG00000168175	MAPK1IP1L	0.377135	0.0029914	18547	40.14
ENSG00000241878	PISD	0.42315	0.00300161	43941	51.17
ENSG00000211456	SACM1L	0.392305	0.00302107	56353	38
ENSG00000157540	DYRK1A	0.377629	0.00302999	160785	39.17
ENSG00000105122	RASAL3	0.38785	0.00303062	12920	57.15
ENSG00000006025	OSBPL7	0.388416	0.00305116	14462	57.86
ENSG00000163131	CTSS	0.419215	0.00305282	35604	39.39
ENSG00000165704	HPRT1	0.398257	0.00305928	60348	40.12
ENSG00000054116	TRAPPC3	0.380576	0.00309247	19483	49.8
ENSG00000136271	DDX56	0.376591	0.00309247	9634	53.74
ENSG00000104883	PEX11G	0.413159	0.00311851	20574	53.44
ENSG00000144152	FBLN7	0.376766	0.00312477	49833	49.52
ENSG00000136111	TBC1D4	0.388233	0.00312557	198666	38.11
ENSG00000100721	TCL1A	0.373267	0.00312598	4249	50.16
ENSG00000188641	DPYD	0.371864	0.00313347	917257	35.1
ENSG00000168329	CX3CR1	0.404892	0.00314511	18240	46.15
ENSG00000148396	SEC16A	0.393972	0.00315104	43663	52.76
ENSG00000146425	DYNLT1	0.378516	0.00315584	8269	45.31
ENSG00000069966	GNB5	0.374023	0.00315886	76264	45.39
ENSG00000211445	GPX3	0.427719	0.0031878	8554	53.03
ENSG00000111412	C12orf49	0.39168	0.00319413	27899	44.26
ENSG00000104880	ARHGEF18	0.396931	0.00319605	77371	51.44
ENSG00000151502	VPS26B	0.379321	0.00320418	23117	48.36
ENSG00000130313	PGLS	0.390464	0.003214	9652	53.3
ENSG00000172508	CARNS1	0.376976	0.0032209	10639	62.67
ENSG00000113300	CNOT6	0.382862	0.00323095	83979	42.09
ENSG00000134905	CARS2	0.400721	0.00323267	72191	48.05
ENSG00000120594	PLXDC2	0.449369	0.00324551	473617	37.34
ENSG00000160058	BSDC1	0.397243	0.00324551	29628	47.99
ENSG00000159263	SIM2	0.371283	0.00324551	50802	51.13
ENSG00000138449	SLC40A1	0.370521	0.00324835	23168	38.25
ENSG00000167658	EEF2	0.429078	0.00325477	9407	59.53
ENSG00000100441	KHNYN	0.406955	0.00325477	12557	52.18
ENSG00000155093	PTPRN2	0.373516	0.00326753	1048767	51.4
ENSG00000074966	TXK	0.416071	0.00327171	67857	39.46
ENSG00000148331	ASB6	0.388814	0.00328393	7565	58.84
ENSG00000172795	DCP2	0.381516	0.00329462	45493	37.78
ENSG00000113742	CPEB4	0.412357	0.00330265	73631	37.29
ENSG00000068024	HDAC4	0.418774	0.00330629	353486	51.33
ENSG00000068120	COASY	0.379296	0.00330764	4810	57.56
ENSG00000135049	AGTPBP1	0.363403	0.00330863	195490	36.66
ENSG00000178685	PARP10	0.390367	0.00331275	35619	54.62
ENSG00000132824	SERINC3	0.370656	0.00332761	25864	42.52
ENSG00000143546	S100A8	0.372192	0.00332895	1041	53.84
ENSG00000085733	CTTN	0.385129	0.0033326	38180	52.81
ENSG00000182831	C16orf72	0.376493	0.0033326	29991	42.03
ENSG00000115568	ZNF142	0.396628	0.00333692	21739	49.52
ENSG00000057704	TMCC3	0.436931	0.0033391	83435	43.11
ENSG00000137804	NUSAP1	0.353581	0.0033391	60256	44.91
ENSG00000022840	RNF10	0.378638	0.00334401	44108	45.25
ENSG00000079332	SAR1A	0.364287	0.0033486	23234	40.56
ENSG00000004534	RBM6	0.406609	0.00336902	160038	44.14
ENSG00000142173	COL6A2	0.381601	0.0033698	34736	55.87
ENSG00000136003	ISCU	0.371223	0.00340176	6802	45.76
ENSG00000130939	UBE4B	0.41399	0.00340283	148407	44.12
ENSG00000239672	NME1	0.399377	0.00340283	8892	46.45
ENSG00000065970	FOXJ2	0.394337	0.00340283	22801	47.53
ENSG00000120686	UFM1	0.367134	0.00340287	13770	33.9
ENSG00000008869	HEATR5B	0.365062	0.00340287	115989	38.6
ENSG00000186063	AIDA	0.399716	0.00340917	45197	38.46
ENSG00000171246	NPTX1	0.386237	0.00341084	11009	59.94
ENSG00000111725	PRKAB1	0.386572	0.00341222	13760	47.61
ENSG00000171222	SCAND1	0.360046	0.00341322	5855	47.71
ENSG00000079263	SP140	0.398703	0.00343365	110105	41.29
ENSG00000145945	FAM50B	0.371778	0.00343634	1947	58.62
ENSG00000127337	YEATS4	0.365926	0.0034398	31160	39.35
ENSG00000125810	CD93	0.448206	0.00345062	6964	51.46
ENSG00000237703	TRIM10	0.417184	0.00346243	8988	45.76
ENSG00000156804	FBXO32	0.388294	0.00346458	43317	44.08
ENSG00000113441	LNPEP	0.424618	0.00347477	102119	37.19
ENSG00000198574	SH2D1B	0.422705	0.00348022	16870	41.4
ENSG00000134294	SLC38A2	0.390519	0.00348022	14585	38.31
ENSG00000134884	ARGLU1	0.384908	0.00348022	26464	37.63
ENSG00000188021	UBQLN2	0.391858	0.00348759	4229	44.3
ENSG00000163430	FSTL1	0.388096	0.00348759	58700	43.79
ENSG00000103111	MON1B	0.428398	0.00349288	11563	49.32
ENSG00000017483	SLC38A5	0.381175	0.0035013	11723	54.9
ENSG00000039650	PNKP	0.392527	0.00350488	18469	59.53
ENSG00000183918	SH2D1A	0.390065	0.00350866	145329	38.98
ENSG00000125734	GPR108	0.402484	0.00350948	7689	60.38
ENSG00000166188	ZNF319	0.375582	0.00350948	5785	60.06
ENSG00000010671	BTK	0.389018	0.00351012	41349	43.18
ENSG00000156256	USP16	0.376282	0.00351012	29859	38.76
ENSG00000123636	BAZ2B	0.388126	0.00352536	297590	36.16
ENSG00000119004	CYP20A1	0.391344	0.00352829	67049	42.27
ENSG00000223609	HBD	0.391081	0.00354014	10979	38.32
ENSG00000125971	DYNLRB1	0.377136	0.00354014	24549	48.33
ENSG00000095059	DHPS	0.437739	0.00354214	6163	54.72
ENSG00000168395	ING5	0.376996	0.00354297	42393	51.69
ENSG00000170027	YWHAG	0.390222	0.00354699	32192	44.52
ENSG00000134283	PPHLN1	0.371595	0.00355854	221268	39.77
ENSG00000185404	SP140L	0.370651	0.00357515	76548	38.73
ENSG00000186416	NKRF	0.383172	0.00358225	18106	42.93
ENSG00000178209	PLEC	0.389579	0.00359469	61587	63.62
ENSG00000169057	MECP2	0.380057	0.00361244	115530	46.41
ENSG00000149243	KLHL35	0.377007	0.00361244	8235	54.7
ENSG00000169976	SF3B5	0.363427	0.0036189	689	56.52
ENSG00000171163	ZNF692	0.388098	0.00364606	9138	54.21
ENSG00000107438	PDLIM1	0.396129	0.00364698	53440	43.73
ENSG00000116017	ARID3A	0.406083	0.00364812	50158	58.94
ENSG00000079950	STX7	0.37744	0.00365739	67331	37.41
ENSG00000204852	TCTN1	0.366718	0.00368993	35403	44.42
ENSG00000135932	CAB39	0.380907	0.00369101	108233	40.78
ENSG00000152492	CCDC50	0.394884	0.00370891	69574	36.59
ENSG00000120727	PAIP2	0.37647	0.00370891	28133	43.58
ENSG00000138639	ARHGAP24	0.415266	0.00371361	527518	36.75
ENSG00000135074	ADAM19	0.40911	0.00371793	180241	44.66
ENSG00000159917	ZNF235	0.372545	0.00371793	76317	39.47
ENSG00000167996	FTH1	0.437673	0.00372249	7916	50.4
ENSG00000196576	PLXNB2	0.405181	0.00372496	32667	64.97
ENSG00000119707	RBM25	0.371163	0.00372943	65367	40.67
ENSG00000101310	SEC23B	0.38948	0.00374185	53895	42.97
ENSG00000159713	TPPP3	0.391903	0.00375436	3709	61.24
ENSG00000186818	LILRB4	0.373678	0.00376702	26470	47.12
ENSG00000126822	PLEKHG3	0.391157	0.00377075	46147	52.94
ENSG00000147475	ERLIN2	0.386665	0.00377834	21821	44.09
ENSG00000171180	OR2M4	0.396971	0.00378448	13262	37.35
ENSG00000143774	GUK1	0.360703	0.00378448	9022	61.76
ENSG00000178028	DMAP1	0.37999	0.0038014	7226	52.33
ENSG00000125304	TM9SF2	0.375583	0.00380747	117737	40.68
ENSG00000033627	ATP6V0A1	0.463797	0.00381786	63767	45.47
ENSG00000137501	SYTL2	0.401499	0.00382003	116935	40.22
ENSG00000100422	CERK	0.38862	0.00382003	53842	51.43
ENSG00000116663	FBXO6	0.39619	0.0038239	10154	55.13
ENSG00000182552	RWDD4	0.356413	0.00385476	19568	40.25
ENSG00000228049	POLR2J2	0.402841	0.00386681	6261	53.42
ENSG00000180549	FUT7	0.387587	0.00386844	1914	66.27
ENSG00000139679	LPAR6	0.408967	0.00387319	55137	36.98
ENSG00000100243	CYB5R3	0.392792	0.00387993	31552	55.85
ENSG00000115415	STAT1	0.37353	0.00390416	112500	38.26
ENSG00000136840	ST6GALNAC4	0.362749	0.00390886	9155	56.64
ENSG00000178021	TSPYL6	0.362608	0.00390886	3051	48.79
ENSG00000134070	IRAK2	0.399298	0.00390971	78826	48.88
ENSG00000165516	KLHDC2	0.383132	0.00391481	18255	40.47
ENSG00000132819	RBM38	0.380939	0.00391903	17937	59.97
ENSG00000125384	PTGER2	0.413747	0.0039363	14293	42.21
ENSG00000038002	AGA	0.412402	0.00394094	11663	39.69
ENSG00000051523	CYBA	0.371728	0.00394885	7765	61.63
ENSG00000120896	SORBS3	0.40461	0.00395537	30802	55.84
ENSG00000142188	TMEM50B	0.349907	0.00395594	47489	43.33
ENSG00000272886	DCP1A	0.407599	0.00396264	64157	41.18
ENSG00000197858	GPAA1	0.371213	0.00396264	3626	64.3
ENSG00000140280	LYSMD2	0.38966	0.00396585	28574	41.49
ENSG00000079308	TNS1	0.373206	0.00396585	234394	52.84
ENSG00000125910	S1PR4	0.359137	0.00396585	7986	62.76
ENSG00000147894	C9orf72	0.373311	0.00397319	38226	36.96
ENSG00000164031	DNAJB14	0.379564	0.00398556	50370	34.7
ENSG00000173674	EIF1AX	0.389224	0.00398773	17313	38.56
ENSG00000005812	FBXL3	0.384617	0.00398773	34597	38.36
ENSG00000185187	SIGIRR	0.382988	0.00398773	11739	65.22
ENSG00000130254	SAFB2	0.381857	0.00398773	37047	49.34
ENSG00000152749	GPR180	0.387153	0.0040047	32804	36.55
ENSG00000108691	CCL2	0.365243	0.0040047	1985	45.97
ENSG00000172164	SNTB1	0.403383	0.00400699	277528	40.4
ENSG00000139514	SLC7A1	0.391002	0.00402947	86274	47.44
ENSG00000166037	CEP57	0.384173	0.00407326	42728	37.69
ENSG00000171033	PKIA	0.383396	0.00407595	88927	34.68
ENSG00000110330	BIRC2	0.386029	0.00408415	31459	38.86
ENSG00000187024	PTRH1	0.371804	0.00408434	34525	53.92
ENSG00000230308	TRIM39	0.36318	0.00409306	17256	44.32
ENSG00000130827	PLXNA3	0.380089	0.00409915	19498	60.44
ENSG00000113194	FAF2	0.36741	0.00409915	62446	42.96
ENSG00000198612	COPS8	0.384761	0.0040995	14592	38.3
ENSG00000168591	TMUB2	0.38276	0.0041059	4959	52.72
ENSG00000167100	SAMD14	0.361062	0.00410649	19842	55.35
ENSG00000136371	MTHFS	0.397419	0.0041094	63794	40.35
ENSG00000091640	SPAG7	0.393527	0.00411025	8591	51.59
ENSG00000188290	HES4	0.404184	0.0041282	1210	74.32
ENSG00000131061	ZNF341	0.409909	0.0041313	60612	49.23
ENSG00000166582	CENPV	0.3855	0.00413158	11122	48.01
ENSG00000006007	GDE1	0.389363	0.00414637	20430	40.14
ENSG00000187474	FPR3	0.383765	0.00418115	31033	42.76
ENSG00000024862	CCDC28A	0.364848	0.0041813	19810	39.18
ENSG00000097046	CDC7	0.375948	0.00418355	24913	36.66
ENSG00000048162	NOP16	0.391658	0.00418875	4989	49.26
ENSG00000099995	SF3A1	0.408844	0.00420133	24931	49.02
ENSG00000166171	DPCD	0.374824	0.00420133	39102	50.18
ENSG00000169714	CNBP	0.364259	0.00420133	16095	42.65
ENSG00000124486	USP9X	0.35975	0.00420739	151134	38.54
ENSG00000148841	ITPRIP	0.406163	0.00420863	28767	52.5
ENSG00000135636	DYSF	0.394198	0.00422681	233046	49.64
ENSG00000167106	FAM102A	0.389739	0.00425463	40407	55.9
ENSG00000068097	HEATR6	0.371788	0.004256	37914	40.88
ENSG00000121297	TSHZ3	0.403982	0.00425622	199457	44.22
ENSG00000214212	C19orf38	0.359879	0.00425622	33215	49.77
ENSG00000180340	FZD2	0.408834	0.00426214	3778	55.78
ENSG00000198839	ZNF277	0.399677	0.00426214	137239	37.35
ENSG00000070214	SLC44A1	0.390269	0.00428755	194549	38.86
ENSG00000110848	CD69	0.402229	0.0042904	8415	35.34
ENSG00000129465	RIPK3	0.399606	0.00429514	3997	55.85
ENSG00000064763	FAR2	0.38044	0.00429637	191877	38.9
ENSG00000124942	AHNAK	0.374916	0.00429676	122693	50.05
ENSG00000172733	PURG	0.359257	0.00429676	37913	36.48
ENSG00000131446	MGAT1	0.390428	0.0043051	30870	50.9
ENSG00000132294	EFR3A	0.391964	0.00431115	109549	35.32
ENSG00000072518	MARK2	0.371279	0.00431788	72091	49.65
ENSG00000162419	GMEB1	0.387539	0.0043259	50621	45.96
ENSG00000134516	DOCK2	0.38648	0.0043259	446114	43.39
ENSG00000175782	SLC35E3	0.373071	0.0043259	47839	43.4
ENSG00000133961	NUMB	0.379794	0.0043383	183510	40.48
ENSG00000146676	PURB	0.377762	0.00434558	9231	41.41
ENSG00000096746	HNRNPH3	0.376953	0.00435005	12017	39.82
ENSG00000142166	IFNAR1	0.400633	0.00435158	35435	41.33
ENSG00000085721	RRN3	0.386666	0.00435301	34278	42.08
ENSG00000177971	IMP3	0.418839	0.00435426	9621	52.2
ENSG00000064225	ST3GAL6	0.381546	0.00435438	88965	38.88
ENSG00000122299	ZC3H7A	0.36217	0.00435666	46672	42.76
ENSG00000105379	ETFB	0.350052	0.00437346	21219	51.45
ENSG00000155229	MMS19	0.361886	0.00437469	40470	44.91
ENSG00000130300	PLVAP	0.355069	0.00437469	25892	51.71
ENSG00000103507	BCKDK	0.384707	0.00437563	6684	57.82
ENSG00000169871	TRIM56	0.377772	0.00437563	12486	53.9
ENSG00000123505	AMD1	0.379165	0.00438202	24109	41.39
ENSG00000197746	PSAP	0.387282	0.0043909	35027	47.68
ENSG00000117586	TNFSF4	0.391832	0.0043934	23600	39.89
ENSG00000133460	SLC2A11	0.369783	0.00439452	29606	50.84
ENSG00000178075	GRAMD1C	0.366925	0.00439452	118992	39.58
ENSG00000120742	SERP1	0.380206	0.00441956	61230	38.84
ENSG00000149573	MPZL2	0.382359	0.00445331	11120	38.82
ENSG00000178988	MRFAP1L1	0.387013	0.00446442	2164	44.76
ENSG00000144848	ATG3	0.395205	0.00447166	29536	36.32
ENSG00000182578	CSF1R	0.396634	0.00452124	60081	48.1
ENSG00000143183	TMCO1	0.383405	0.00454201	103462	39.88
ENSG00000134697	GNL2	0.370638	0.00454201	29121	42.78
ENSG00000128739	SNRPN	0.369684	0.00454201	155086	41.92
ENSG00000072818	ACAP1	0.370127	0.00454552	14948	54.55
ENSG00000162645	GBP2	0.364575	0.00455699	44324	38
ENSG00000145649	GZMA	0.401297	0.00457179	7606	39.31
ENSG00000141505	ASGR1	0.371892	0.00458166	6133	55.95
ENSG00000110047	EHD1	0.36281	0.00458166	36654	54.84
ENSG00000133641	C12orf29	0.380841	0.00459151	16314	36.21
ENSG00000141084	RANBP10	0.36607	0.00459153	83582	49.73
ENSG00000167536	DHRS13	0.375724	0.00461579	5298	54.99
ENSG00000144579	CTDSP1	0.395436	0.00463331	7685	63.19
ENSG00000111696	NT5DC3	0.368545	0.00463331	70781	43.11
ENSG00000148606	POLR3A	0.384613	0.0046338	60264	44.69
ENSG00000198890	PRMT6	0.383042	0.00463495	10962	39.33
ENSG00000026103	FAS	0.36479	0.00463721	26528	37.94
ENSG00000129667	RHBDF2	0.370797	0.00463889	30899	57.78
ENSG00000003393	ALS2	0.372406	0.00464942	80689	37.99
ENSG00000241839	PLEKHO2	0.432227	0.00465228	26119	53.96
ENSG00000132514	CLEC10A	0.388555	0.00467009	5770	53.21
ENSG00000197771	MCMBP	0.366964	0.00467009	63152	41.74
ENSG00000138772	ANXA3	0.368532	0.00467103	58704	39.9
ENSG00000100100	PIK3IP1	0.368882	0.00467865	10940	51.26
ENSG00000234883	MIR155HG	0.367461	0.00470687	13259	37.7
ENSG00000118855	MFSD1	0.370405	0.00471446	97521	40.83
ENSG00000167984	NLRC3	0.394021	0.00471719	38370	51.01
ENSG00000131771	PPP1R1B	0.378938	0.00472099	9886	57.94
ENSG00000154188	ANGPT1	0.354489	0.00473223	248573	36.05
ENSG00000137216	TMEM63B	0.349385	0.00473223	28605	54.28
ENSG00000213780	GTF2H4	0.358665	0.00474774	5899	51.2
ENSG00000146247	PHIP	0.3855	0.00476664	143835	34.28
ENSG00000198945	L3MBTL3	0.367262	0.00476917	127750	38.41
ENSG00000078114	NEBL	0.364358	0.00478092	394214	39.04
ENSG00000181027	FKRP	0.382492	0.00478199	30942	51.13
ENSG00000198959	TGM2	0.36481	0.00479356	39193	52.67
ENSG00000115468	EFHD1	0.355943	0.00479706	76723	48.71
ENSG00000010322	NISCH	0.360318	0.00481508	37950	53.28
ENSG00000138134	STAMBPL1	0.371135	0.00481682	95419	39.34
ENSG00000075975	MKRN2	0.358725	0.00482927	26626	45.07
ENSG00000120318	ARAP3	0.415248	0.00483994	28829	51.43
ENSG00000159674	SPON2	0.403171	0.00483994	42030	53.74
ENSG00000140287	HDC	0.365738	0.00483994	24018	46.39
ENSG00000138814	PPP3CA	0.349567	0.00484054	324869	35.79
ENSG00000153944	MSI2	0.37342	0.00484795	428838	47.5
ENSG00000169019	COMMD8	0.373313	0.00484795	12915	36.36
ENSG00000243449	C4orf48	0.359292	0.00485755	1977	69.21
ENSG00000114062	UBE3A	0.378149	0.00485775	105323	36.2
ENSG00000071889	FAM3A	0.363498	0.00486705	10083	55.32
ENSG00000140471	LINS1	0.364113	0.00487134	43861	40.18
ENSG00000134758	RNF138	0.373132	0.00487604	39687	40.1
ENSG00000121552	CSTA	0.380424	0.00487604	16721	41.8
ENSG00000158715	SLC45A3	0.362075	0.00487604	22658	54.44
ENSG00000179950	PUF60	0.345549	0.00487753	13008	61.8
ENSG00000145491	ROPN1L	0.378055	0.00490039	30505	49.76
ENSG00000113658	SMAD5	0.388565	0.00494078	55902	37.17
ENSG00000115216	NRBP1	0.352561	0.00494078	14469	48.61
ENSG00000112394	SLC16A10	0.397227	0.00496225	143691	40.2
ENSG00000132274	TRIM22	0.377857	0.0049623	47392	38.58
ENSG00000151332	MBIP	0.343991	0.0049623	22073	35.22
ENSG00000173473	SMARCC1	0.363953	0.00496429	196837	41.6
ENSG00000049239	H6PD	0.375748	0.00496811	36563	52.29
ENSG00000157593	SLC35B2	0.380667	0.00499601	3794	58.08
ENSG00000075914	EXOSC7	0.452344	0.00500174	60825	46.87
ENSG00000042753	AP2S1	0.383178	0.00501586	12710	52.84
ENSG00000164830	OXR1	0.391042	0.00504076	393218	36.58
ENSG00000100106	TRIOBP	0.384092	0.00504076	79508	54.36
ENSG00000151729	SLC25A4	0.366817	0.00504076	7116	46.85
ENSG00000111364	DDX55	0.379117	0.00504083	18866	45.84
ENSG00000135341	MAP3K7	0.385124	0.00504557	73499	35.82
ENSG00000121691	CAT	0.359195	0.0050789	33126	40.59
ENSG00000163931	TKT	0.408317	0.00509321	31340	54.36
ENSG00000133393	FOPNL	0.384336	0.00509783	22906	41.69
ENSG00000139055	ERP27	0.379696	0.00511731	24498	38.33
ENSG00000160785	SLC25A44	0.394181	0.00512943	18864	48.29
ENSG00000099219	ERMP1	0.375523	0.00512943	68041	39
ENSG00000147130	ZMYM3	0.376288	0.00513008	15522	53.76
ENSG00000152291	TGOLN2	0.375542	0.00513008	10276	47.55
ENSG00000130529	TRPM4	0.346595	0.00515039	54095	50.3
ENSG00000090674	MCOLN1	0.369862	0.00515044	11385	57.01
ENSG00000188677	PARVB	0.373111	0.00517062	173738	50.79
ENSG00000111880	RNGTT	0.371318	0.00518483	353721	36.63
ENSG00000117335	CD46	0.374626	0.00519146	43459	38.22
ENSG00000100583	SAMD15	0.357237	0.00519376	14808	44.51
ENSG00000134765	DSC1	0.385788	0.00520069	33620	35.2
ENSG00000115137	DNAJC27	0.355624	0.00520069	28458	40.71
ENSG00000177455	CD19	0.356534	0.00520882	7377	56.52
ENSG00000116984	MTR	0.339715	0.00520882	125986	40.64
ENSG00000128656	CHN1	0.367078	0.00521946	206572	37.23
ENSG00000197540	GZMM	0.381429	0.00522076	5890	60.74
ENSG00000095564	BTAF1	0.364852	0.00522363	106555	37.37
ENSG00000258227	CLEC5A	0.357597	0.00522363	19650	40.03
ENSG00000124107	SLPI	0.370279	0.00522961	2325	51.29
ENSG00000172057	ORMDL3	0.371631	0.00523307	6560	57.09
ENSG00000101445	PPP1R16B	0.395339	0.00524413	117327	47.52
ENSG00000140153	WDR20	0.380389	0.00524413	85344	45.46
ENSG00000101162	TUBB1	0.362101	0.00524959	7225	44.08
ENSG00000177700	POLR2L	0.389487	0.00525352	5173	61.02
ENSG00000103197	TSC2	0.384999	0.00525352	41524	59.93
ENSG00000154217	PITPNC1	0.370024	0.00530404	319980	44.62
ENSG00000166947	EPB42	0.360939	0.00531261	23898	50.06
ENSG00000101773	RBBP8	0.366514	0.00532271	228227	37.83
ENSG00000117009	KMO	0.347135	0.00535164	63508	38
ENSG00000122958	VPS26A	0.365279	0.0053698	50900	39.83
ENSG00000129187	DCTD	0.39733	0.00537931	27876	46.1
ENSG00000227816	TAP1	0.377889	0.00537931	8769	50.44
ENSG00000174123	TLR10	0.362097	0.00537931	10752	38.76
ENSG00000168461	RAB31	0.357418	0.00538337	154276	43.6
ENSG00000172175	MALT1	0.389765	0.00539463	83012	38.93
ENSG00000149313	AASDHPPT	0.387336	0.00539463	23198	36.56
ENSG00000189403	HMGB1	0.375164	0.00539463	160893	41.99
ENSG00000035862	TIMP2	0.380361	0.00542068	72410	52.6
ENSG00000126458	RRAS	0.347096	0.00545271	4851	59.05
ENSG00000088448	ANKRD10	0.353326	0.00545779	36529	40
ENSG00000109736	MFSD10	0.371005	0.00545834	4273	67.43
ENSG00000119711	ALDH6A1	0.365703	0.00549403	27645	43.41
ENSG00000123240	OPTN	0.39509	0.00550266	38859	42.4
ENSG00000163312	HELQ	0.358056	0.00550992	48512	38.46
ENSG00000106404	CLDN15	0.364536	0.00551836	6728	59.59
ENSG00000130640	TUBGCP2	0.375151	0.00553176	33707	55.72
ENSG00000141367	CLTC	0.342657	0.00555899	77267	38.54
ENSG00000091490	SEL1L3	0.370378	0.00556428	116327	43.64
ENSG00000188321	ZNF559	0.3815	0.00556799	27390	40.31
ENSG00000080371	RAB21	0.365588	0.00556799	45423	37.14
ENSG00000100014	SPECC1L	0.351535	0.005572	146922	42.29
ENSG00000138442	WDR12	0.374252	0.00557798	140537	39.19
ENSG00000102034	ELF4	0.381078	0.00558441	46761	51.68
ENSG00000070540	WIPI1	0.391896	0.00559427	36565	46.58
ENSG00000138750	NUP54	0.396005	0.00559476	33785	36.75
ENSG00000105677	TMEM147	0.36659	0.00559476	1926	58.54
ENSG00000068079	IFI35	0.374124	0.00560274	7716	50.91
ENSG00000090863	GLG1	0.364717	0.00562692	159717	42.38
ENSG00000115084	SLC35F5	0.380793	0.00569851	51682	36.65
ENSG00000126756	UXT	0.347204	0.00576002	7384	45.02
ENSG00000116815	CD58	0.359259	0.00579257	56505	41.62
ENSG00000133703	KRAS	0.395011	0.00579745	45690	36.42
ENSG00000239713	APOBEC3G	0.356473	0.00580432	10676	54.63
ENSG00000109762	SNX25	0.361472	0.00580566	165948	41.36
ENSG00000185885	IFITM1	0.349564	0.00581415	1766	57.05
ENSG00000171291	ZNF439	0.358811	0.00581933	35024	43.96
ENSG00000087903	RFX2	0.356528	0.00581933	206408	47.54
ENSG00000130595	TNNT3	0.387754	0.00585667	19003	61.19
ENSG00000117298	ECE1	0.370077	0.00586912	128325	52.21
ENSG00000118960	HS1BP3	0.36058	0.00588648	90682	52.47
ENSG00000132313	MRPL35	0.365927	0.00588714	14435	40.87
ENSG00000090372	STRN4	0.388878	0.00589336	27483	57.35
ENSG00000138363	ATIC	0.420403	0.00589753	37817	41.05
ENSG00000143924	EML4	0.360783	0.00589753	163195	38.02
ENSG00000170265	ZNF282	0.35276	0.00589753	30692	51.83
ENSG00000115738	ID2	0.401563	0.00593284	5616	49.24
ENSG00000172469	MANEA	0.381117	0.00593284	31917	33.81
ENSG00000205269	TMEM170B	0.369297	0.00594304	45775	37.06
ENSG00000160255	ITGB2	0.379402	0.00595997	46036	57.45
ENSG00000015475	BID	0.37365	0.00596867	40632	52.51
[truncated: 2,432 more rows]

## Sheet: ST-4a
Supplementary table 4a: List of Ageing associated (n=265) available for OATS analysis
Foot notes: source: GenAge
List of Ageing associated genes overlapping with OATS (n=265)	FDR significant/non significant in OATS
AGPAT2	FDR significant in OATS
AIFM1	FDR significant in OATS
AKT1	FDR significant in OATS
ATM	FDR significant in OATS
BCL2	FDR significant in OATS
BDNF	FDR significant in OATS
BMI1	FDR significant in OATS
BSCL2	FDR significant in OATS
BUB3	FDR significant in OATS
CAT	FDR significant in OATS
CDKN1A	FDR significant in OATS
CDKN2B	FDR significant in OATS
CEBPA	FDR significant in OATS
CREB1	FDR significant in OATS
CSNK1E	FDR significant in OATS
DBN1	FDR significant in OATS
DDIT3	FDR significant in OATS
DGAT1	FDR significant in OATS
EEF1A1	FDR significant in OATS
EEF2	FDR significant in OATS
EIF5A2	FDR significant in OATS
ERBB2	FDR significant in OATS
ERCC1	FDR significant in OATS
ERCC5	FDR significant in OATS
FAS	FDR significant in OATS
FGF23	FDR significant in OATS
FOS	FDR significant in OATS
FOXO3	FDR significant in OATS
GPX4	FDR significant in OATS
GRN	FDR significant in OATS
GSR	FDR significant in OATS
GSS	FDR significant in OATS
HIF1A	FDR significant in OATS
HMGB1	FDR significant in OATS
HMGB2	FDR significant in OATS
HSF1	FDR significant in OATS
HSPA1A	FDR significant in OATS
HTT	FDR significant in OATS
IGFBP3	FDR significant in OATS
IL7R	FDR significant in OATS
IRS2	FDR significant in OATS
JUN	FDR significant in OATS
JUND	FDR significant in OATS
LMNA	FDR significant in OATS
MAPK3	FDR significant in OATS
MAPK9	FDR significant in OATS
MAX	FDR significant in OATS
MDM2	FDR significant in OATS
MIF	FDR significant in OATS
MSRA	FDR significant in OATS
MTOR	FDR significant in OATS
MXI1	FDR significant in OATS
MYC	FDR significant in OATS
NFE2L2	FDR significant in OATS
NFKB2	FDR significant in OATS
NR3C1	FDR significant in OATS
NRG1	FDR significant in OATS
NUDT1	FDR significant in OATS
PCMT1	FDR significant in OATS
PDGFRB	FDR significant in OATS
PIK3R1	FDR significant in OATS
PLCG2	FDR significant in OATS
PPP1CA	FDR significant in OATS
PRDX1	FDR significant in OATS
PRKCA	FDR significant in OATS
PRKCD	FDR significant in OATS
PTGS2	FDR significant in OATS
PTK2	FDR significant in OATS
RPA1	FDR significant in OATS
SHC1	FDR significant in OATS
SOD2	FDR significant in OATS
SP1	FDR significant in OATS
STK11	FDR significant in OATS
SUN1	FDR significant in OATS
TNF	FDR significant in OATS
TRAP1	FDR significant in OATS
UBB	FDR significant in OATS
UCP2	FDR significant in OATS
UCP3	FDR significant in OATS
ZMPSTE24	FDR significant in OATS
A2M	FDR non-significant in OATS
ABL1	FDR non-significant in OATS
ADCY5	FDR non-significant in OATS
AGTR1	FDR non-significant in OATS
APEX1	FDR non-significant in OATS
APOC3	FDR non-significant in OATS
APP	FDR non-significant in OATS
APTX	FDR non-significant in OATS
AR	FDR non-significant in OATS
ARHGAP1	FDR non-significant in OATS
ARNTL	FDR non-significant in OATS
ATF2	FDR non-significant in OATS
ATR	FDR non-significant in OATS
BAX	FDR non-significant in OATS
BLM	FDR non-significant in OATS
BRCA1	FDR non-significant in OATS
C1QA	FDR non-significant in OATS
CACNA1A	FDR non-significant in OATS
CCNA2	FDR non-significant in OATS
CDC42	FDR non-significant in OATS
CDK1	FDR non-significant in OATS
CDKN2A	FDR non-significant in OATS
CEBPB	FDR non-significant in OATS
CETP	FDR non-significant in OATS
CHEK2	FDR non-significant in OATS
CLOCK	FDR non-significant in OATS
CLU	FDR non-significant in OATS
CNR1	FDR non-significant in OATS
COQ7	FDR non-significant in OATS
CREBBP	FDR non-significant in OATS
CTF1	FDR non-significant in OATS
CTGF	FDR non-significant in OATS
CTNNB1	FDR non-significant in OATS
E2F1	FDR non-significant in OATS
EFEMP1	FDR non-significant in OATS
EGF	FDR non-significant in OATS
EGFR	FDR non-significant in OATS
EGR1	FDR non-significant in OATS
ELN	FDR non-significant in OATS
EMD	FDR non-significant in OATS
EP300	FDR non-significant in OATS
EPOR	FDR non-significant in OATS
EPS8	FDR non-significant in OATS
ERCC2	FDR non-significant in OATS
ERCC3	FDR non-significant in OATS
ERCC4	FDR non-significant in OATS
ERCC6	FDR non-significant in OATS
ERCC8	FDR non-significant in OATS
ESR1	FDR non-significant in OATS
FGF21	FDR non-significant in OATS
FGFR1	FDR non-significant in OATS
FOXM1	FDR non-significant in OATS
FOXO1	FDR non-significant in OATS
FOXO4	FDR non-significant in OATS
GCLC	FDR non-significant in OATS
GCLM	FDR non-significant in OATS
GDF11	FDR non-significant in OATS
GHRHR	FDR non-significant in OATS
GPX1	FDR non-significant in OATS
GRB2	FDR non-significant in OATS
GSK3A	FDR non-significant in OATS
GSK3B	FDR non-significant in OATS
GSTA4	FDR non-significant in OATS
GTF2H2	FDR non-significant in OATS
H2AFX	FDR non-significant in OATS
HBP1	FDR non-significant in OATS
HDAC1	FDR non-significant in OATS
HDAC2	FDR non-significant in OATS
HDAC3	FDR non-significant in OATS
HELLS	FDR non-significant in OATS
HIC1	FDR non-significant in OATS
HOXB7	FDR non-significant in OATS
HOXC4	FDR non-significant in OATS
HSP90AA1	FDR non-significant in OATS
HSPA8	FDR non-significant in OATS
HSPD1	FDR non-significant in OATS
HTRA2	FDR non-significant in OATS
IGF1	FDR non-significant in OATS
IGF1R	FDR non-significant in OATS
IGF2	FDR non-significant in OATS
IGFBP2	FDR non-significant in OATS
IKBKB	FDR non-significant in OATS
IL2RG	FDR non-significant in OATS
IL6	FDR non-significant in OATS
IL7	FDR non-significant in OATS
INSR	FDR non-significant in OATS
IRS1	FDR non-significant in OATS
JAK2	FDR non-significant in OATS
KCNA3	FDR non-significant in OATS
KL	FDR non-significant in OATS
LEP	FDR non-significant in OATS
LEPR	FDR non-significant in OATS
LMNB1	FDR non-significant in OATS
LRP2	FDR non-significant in OATS
MAP3K5	FDR non-significant in OATS
MAPK14	FDR non-significant in OATS
MAPK8	FDR non-significant in OATS
MAPT	FDR non-significant in OATS
MED1	FDR non-significant in OATS
MLH1	FDR non-significant in OATS
MXD1	FDR non-significant in OATS
NBN	FDR non-significant in OATS
NCOR1	FDR non-significant in OATS
NCOR2	FDR non-significant in OATS
NFKB1	FDR non-significant in OATS
NFKBIA	FDR non-significant in OATS
NGFR	FDR non-significant in OATS
NOG	FDR non-significant in OATS
PAPPA	FDR non-significant in OATS
PCK1	FDR non-significant in OATS
PCNA	FDR non-significant in OATS
PDGFB	FDR non-significant in OATS
PDGFRA	FDR non-significant in OATS
PDPK1	FDR non-significant in OATS
PIK3CA	FDR non-significant in OATS
PIK3CB	FDR non-significant in OATS
PIN1	FDR non-significant in OATS
PLAU	FDR non-significant in OATS
PMCH	FDR non-significant in OATS
PML	FDR non-significant in OATS
POLA1	FDR non-significant in OATS
POLB	FDR non-significant in OATS
POLD1	FDR non-significant in OATS
POLG	FDR non-significant in OATS
PON1	FDR non-significant in OATS
PPARA	FDR non-significant in OATS
PPARG	FDR non-significant in OATS
PPARGC1A	FDR non-significant in OATS
PPM1D	FDR non-significant in OATS
PRKDC	FDR non-significant in OATS
PROP1	FDR non-significant in OATS
PSEN1	FDR non-significant in OATS
PTK2B	FDR non-significant in OATS
PTPN1	FDR non-significant in OATS
PYCR1	FDR non-significant in OATS
RAD51	FDR non-significant in OATS
RAD52	FDR non-significant in OATS
RAE1	FDR non-significant in OATS
RB1	FDR non-significant in OATS
RECQL4	FDR non-significant in OATS
RET	FDR non-significant in OATS
RGN	FDR non-significant in OATS
RICTOR	FDR non-significant in OATS
SDHC	FDR non-significant in OATS
SERPINE1	FDR non-significant in OATS
SIN3A	FDR non-significant in OATS
SIRT3	FDR non-significant in OATS
SIRT6	FDR non-significant in OATS
SIRT7	FDR non-significant in OATS
SLC13A1	FDR non-significant in OATS
SOCS2	FDR non-significant in OATS
SQSTM1	FDR non-significant in OATS
SST	FDR non-significant in OATS
SSTR3	FDR non-significant in OATS
STAT3	FDR non-significant in OATS
STAT5A	FDR non-significant in OATS
STAT5B	FDR non-significant in OATS
STUB1	FDR non-significant in OATS
SUMO1	FDR non-significant in OATS
TAF1	FDR non-significant in OATS
TBP	FDR non-significant in OATS
TCF3	FDR non-significant in OATS
TERC	FDR non-significant in OATS
TERF1	FDR non-significant in OATS
TERF2	FDR non-significant in OATS
TFAP2A	FDR non-significant in OATS
TOP1	FDR non-significant in OATS
TOP2A	FDR non-significant in OATS
TOP2B	FDR non-significant in OATS
TOP3B	FDR non-significant in OATS
TP53	FDR non-significant in OATS
TP53BP1	FDR non-significant in OATS
TP63	FDR non-significant in OATS
TPP2	FDR non-significant in OATS
TRPV1	FDR non-significant in OATS
UBE2I	FDR non-significant in OATS
UCHL1	FDR non-significant in OATS
UCP1	FDR non-significant in OATS
VCP	FDR non-significant in OATS
VEGFA	FDR non-significant in OATS
WRN	FDR non-significant in OATS
XPA	FDR non-significant in OATS
XRCC5	FDR non-significant in OATS
XRCC6	FDR non-significant in OATS
YWHAZ	FDR non-significant in OATS

## Sheet: ST-4b
Supplementary table 4b: List of Longevity related genes (n=225) available for OATS analysis
Foot notes: source: GenAge
List of Longevity genes overlapping with OATS (n=225)	FDR significant/non significant in OATS
LMNA	FDR significant in OATS
MKL1	FDR significant in OATS
OGDH	FDR significant in OATS
UCP3	FDR significant in OATS
LINGO2	FDR significant in OATS
LYPLAL1	FDR significant in OATS
PPP2R2B	FDR significant in OATS
ATM	FDR significant in OATS
DOCK8	FDR significant in OATS
FOXO3	FDR significant in OATS
CASP5	FDR significant in OATS
TBXAS1	FDR significant in OATS
EIF4E3	FDR significant in OATS
FHIT	FDR significant in OATS
ADRB2	FDR significant in OATS
LY86	FDR significant in OATS
CCL5	FDR significant in OATS
NR3C1	FDR significant in OATS
TMEM2	FDR significant in OATS
HLA-DRB1	FDR significant in OATS
KLRF1	FDR significant in OATS
DOCK2	FDR significant in OATS
GHRL	FDR significant in OATS
HSPA1A	FDR significant in OATS
PTAR1	FDR significant in OATS
SULT1A1	FDR significant in OATS
GSTT1	FDR significant in OATS
IFNG	FDR significant in OATS
HMOX1	FDR significant in OATS
AKAP10	FDR significant in OATS
HSPA1L	FDR significant in OATS
CYP1B1	FDR significant in OATS
TLR4	FDR significant in OATS
MTR	FDR significant in OATS
TNF	FDR significant in OATS
MEFV	FDR significant in OATS
IRS2	FDR significant in OATS
AKT1	FDR significant in OATS
GSR	FDR significant in OATS
RAD23B	FDR significant in OATS
ADA	FDR significant in OATS
C7orf50	FDR significant in OATS
PARVG	FDR significant in OATS
PPP2R2C	FDR significant in OATS
HPCAL1	FDR significant in OATS
ABCC4	FDR significant in OATS
UCP2	FDR significant in OATS
MT2A	FDR significant in OATS
HP	FDR significant in OATS
MAP3K7	FDR significant in OATS
SOD2	FDR significant in OATS
UBE4B	FDR significant in OATS
CDKN1A	FDR significant in OATS
YWHAG	FDR significant in OATS
TSC1	FDR significant in OATS
SREBF1	FDR significant in OATS
CSF1R	FDR significant in OATS
FAS	FDR significant in OATS
SUMF1	FDR significant in OATS
CDKN2B	FDR significant in OATS
GPC6	FDR significant in OATS
CLYBL	FDR significant in OATS
LY6G6F	FDR significant in OATS
NBEA	FDR significant in OATS
RNF145	FDR significant in OATS
TSC2	FDR significant in OATS
EIF4E	FDR significant in OATS
HIF1A	FDR significant in OATS
LAMTOR2	FDR significant in OATS
LAMTOR3	FDR significant in OATS
MTOR	FDR significant in OATS
NT5DC1	FDR significant in OATS
PRKCA	FDR significant in OATS
PRR5	FDR significant in OATS
PRR5L	FDR significant in OATS
RB1CC1	FDR significant in OATS
RRAGA	FDR significant in OATS
RRAGD	FDR significant in OATS
TMEM151B	FDR significant in OATS
ZBTB20	FDR significant in OATS
SEMA6A	FDR non-significant in OATS
POLDIP3	FDR non-significant in OATS
EGFR	FDR non-significant in OATS
CCDC88C	FDR non-significant in OATS
KL	FDR non-significant in OATS
PCSK1	FDR non-significant in OATS
XDH	FDR non-significant in OATS
DLD	FDR non-significant in OATS
METTL1	FDR non-significant in OATS
F7	FDR non-significant in OATS
AKT3	FDR non-significant in OATS
IL12A	FDR non-significant in OATS
CADM1	FDR non-significant in OATS
ERCC2	FDR non-significant in OATS
RAD52	FDR non-significant in OATS
SIRT3	FDR non-significant in OATS
SOCS2	FDR non-significant in OATS
TOMM40	FDR non-significant in OATS
DCPS	FDR non-significant in OATS
SIRT6	FDR non-significant in OATS
SGK1	FDR non-significant in OATS
SH2D4A	FDR non-significant in OATS
LYN	FDR non-significant in OATS
ZWINT	FDR non-significant in OATS
ESRRG	FDR non-significant in OATS
CARS	FDR non-significant in OATS
C20orf194	FDR non-significant in OATS
CSMD3	FDR non-significant in OATS
TXNRD1	FDR non-significant in OATS
RARB	FDR non-significant in OATS
PAPD5	FDR non-significant in OATS
PPARG	FDR non-significant in OATS
PICALM	FDR non-significant in OATS
WWOX	FDR non-significant in OATS
RUNX3	FDR non-significant in OATS
UCP1	FDR non-significant in OATS
BTBD9	FDR non-significant in OATS
PON1	FDR non-significant in OATS
TTC27	FDR non-significant in OATS
ESR1	FDR non-significant in OATS
APOC3	FDR non-significant in OATS
ACE	FDR non-significant in OATS
SERPINE1	FDR non-significant in OATS
IL6	FDR non-significant in OATS
AGT	FDR non-significant in OATS
HFE	FDR non-significant in OATS
CETP	FDR non-significant in OATS
INSR	FDR non-significant in OATS
IGF2	FDR non-significant in OATS
CPB2	FDR non-significant in OATS
YTHDF2	FDR non-significant in OATS
TERC	FDR non-significant in OATS
CYP19A1	FDR non-significant in OATS
TP53	FDR non-significant in OATS
GHRHR	FDR non-significant in OATS
GHSR	FDR non-significant in OATS
IGF2R	FDR non-significant in OATS
WRN	FDR non-significant in OATS
POLB	FDR non-significant in OATS
MLH1	FDR non-significant in OATS
H2AFX	FDR non-significant in OATS
XRCC5	FDR non-significant in OATS
DRD4	FDR non-significant in OATS
ATRIP	FDR non-significant in OATS
CACNA1C	FDR non-significant in OATS
NLRC5	FDR non-significant in OATS
SSTR3	FDR non-significant in OATS
LOC100631378	FDR non-significant in OATS
TGFA	FDR non-significant in OATS
CLSTN2	FDR non-significant in OATS
FAM19A5	FDR non-significant in OATS
IGF1R	FDR non-significant in OATS
CAMK4	FDR non-significant in OATS
TAS2R16	FDR non-significant in OATS
GSTZ1	FDR non-significant in OATS
GPX1	FDR non-significant in OATS
VEGFA	FDR non-significant in OATS
AGER	FDR non-significant in OATS
HLA-DQB1	FDR non-significant in OATS
EXO1	FDR non-significant in OATS
FOXO1	FDR non-significant in OATS
ADARB1	FDR non-significant in OATS
ADARB2	FDR non-significant in OATS
HSPA14	FDR non-significant in OATS
AGTR1	FDR non-significant in OATS
TTR	FDR non-significant in OATS
NDUFS1	FDR non-significant in OATS
DBT	FDR non-significant in OATS
RHOA	FDR non-significant in OATS
FOXO4	FDR non-significant in OATS
RICTOR	FDR non-significant in OATS
TSFM	FDR non-significant in OATS
RPS6	FDR non-significant in OATS
SLC4A4	FDR non-significant in OATS
SGK3	FDR non-significant in OATS
ULK1	FDR non-significant in OATS
YY1	FDR non-significant in OATS
PROM1	FDR non-significant in OATS
SORCS1	FDR non-significant in OATS
PGPEP1	FDR non-significant in OATS
MYT1L	FDR non-significant in OATS
UBE2H	FDR non-significant in OATS
TNFRSF11A	FDR non-significant in OATS
ATXN7L3B	FDR non-significant in OATS
FGFR1	FDR non-significant in OATS
CHST11	FDR non-significant in OATS
PREX1	FDR non-significant in OATS
ERGIC1	FDR non-significant in OATS
EPB41L4B	FDR non-significant in OATS
XKR6	FDR non-significant in OATS
MYO9B	FDR non-significant in OATS
AIF1	FDR non-significant in OATS
TOX	FDR non-significant in OATS
GBA3	FDR non-significant in OATS
TNFSF8	FDR non-significant in OATS
NAV2	FDR non-significant in OATS
ANGEL1	FDR non-significant in OATS
CAMTA1	FDR non-significant in OATS
KCTD1	FDR non-significant in OATS
CDK14	FDR non-significant in OATS
POT1	FDR non-significant in OATS
PLEKHA7	FDR non-significant in OATS
PIK3CA	FDR non-significant in OATS
KIF13B	FDR non-significant in OATS
ADAMTSL1	FDR non-significant in OATS
AKT1S1	FDR non-significant in OATS
C2	FDR non-significant in OATS
CDKN2C	FDR non-significant in OATS
CTNNA2	FDR non-significant in OATS
DEPTOR	FDR non-significant in OATS
DLGAP5	FDR non-significant in OATS
EIF4B	FDR non-significant in OATS
LRP1B	FDR non-significant in OATS
MAPKAP1	FDR non-significant in OATS
MLST8	FDR non-significant in OATS
NFKB1	FDR non-significant in OATS
PLXNA4	FDR non-significant in OATS
PPARGC1A	FDR non-significant in OATS
RPTOR	FDR non-significant in OATS
RRAGB	FDR non-significant in OATS
RRAGC	FDR non-significant in OATS
SLC6A7	FDR non-significant in OATS
SYNE1	FDR non-significant in OATS
SYT13	FDR non-significant in OATS
TRIM25	FDR non-significant in OATS

## Sheet: ST-4c
Supplementary table 4c: Ageing associated and Longevity overlapping list of genes
Foot notes: source: GenAge
Ageing associated and Longevity overlapping list of genes (n=55)
AKT1
ATM
CDKN1A
CDKN2B
FAS
FOXO3
GSR
HIF1A
HSPA1A
IRS2
LMNA
MTOR
NR3C1
PRKCA
SOD2
TNF
UCP2
UCP3
AGTR1
APOC3
CETP
EGFR
ERCC2
ESR1
FGFR1
FOXO1
FOXO4
GHRHR
GPX1
H2AFX
IGF1R
IGF2
IL6
INSR
KL
MLH1
NFKB1
PIK3CA
POLB
PON1
PPARG
PPARGC1A
RAD52
RICTOR
SERPINE1
SIRT3
SIRT6
SOCS2
SSTR3
TERC
TP53
UCP1
VEGFA
WRN
XRCC5

## Sheet: ST-4d
Supplementary table 4d: Chi-square table for Longevity related genes for OATS and Ouwens et al., 2020
Data set		Longevity genes	Non- longevity genes	Total genes	Fisher's Exact test p-value	OR	95 % CI
OATS	FDR sig	80	4523	4603	7.702e-05	1.77	1.33, 2.35
	Non FDR sig	145	14508	14653
	Total genes	225	19031	19256
Ouwens et al., 2020	FDR sig	43	2288	2331	0.6567	1.08	0.75, 1.53
	Non FDR sig	155	8923	9078
	Total genes	198	11211	11409

## Sheet: ST-4e
Supplementary table 4e: Chi-square table for Ageing associated genes for OATS and Ouwens et al., 2020
Data set		Ageing_associated genes	Non- ageing genes	Total genes	Fisher's Exact test p-value	OR	95 % CI
OATS	FDR sig	80	4523	4603	0.02003	1.38	1.04, 1.81
	Non FDR sig	185	14468	14653
	Total genes	265	18991	19256
Ouwens et al., 2020	FDR sig	44	2287	2331	0.5673	0.89	0.63, 1.25
	Non FDR sig	191	8887	9078
	Total genes	235	11174	11409

## Sheet: ST-5
Supplementary table 5: List of bottom most 460 (bottom 10%) genes with FDR>0.05 and that did not have any heritable transcripts
All Wright results where applicable, were not signficant (except KLRK1)
Gene symbol	Probe ID	h2	Chr	FDR	Available in Wright et al., 2014 results
FRMPD2	ENSG00000170324	3.02e-21	10	1
C15orf34	ENSG00000260339	3.36e-21	15	1
LYSMD1	ENSG00000163155	5.62e-21	1	1	Yes; non-significant
FLJ45079	ENSG00000204283	3.05e-20	17	1
AW296529	NA	3.29e-20	12	1
MYOC	ENSG00000034971	5.35e-20	1	1	Yes; non-significant
BU752765	NA	6.09e-20	3	1
ZAN	ENSG00000146839	6.23e-20	7	1	Yes; non-significant
OR1B1	ENSG00000171484	7.58e-20	9	1	Yes; non-significant
PKDREJ	ENSG00000130943	8.48e-20	22	1	Yes; non-significant
AK095506	NA	1.03e-19	13	1
GABRB2	ENSG00000145864	1.06e-19	5	1	Yes; non-significant
BC040901	ENSG00000245317	1.06e-19	5	1
OR3A2	ENSG00000221882	1.23e-19	17	1	Yes; non-significant
AA705831	NA	1.39e-19	13	1
SLC47A2	ENSG00000180638	1.5e-19	17	1	Yes; non-significant
ZNF582	ENSG00000018869	1.77e-19	19	1	Yes; non-significant
ADRB1	ENSG00000043591	1.85e-19	10	1	Yes; non-significant
ITGA3	ENSG00000005884	2.71e-19	17	1	Yes; non-significant
BQ776066	NA	2.75e-19	10	1
C6orf141	ENSG00000197261	3.05e-19	6	1	Yes; non-significant
RASSF6	ENSG00000169435	3.12e-19	4	1	Yes; non-significant
SCARNA2	ENSG00000270066	4.1e-19	1	1
AKNAD1	ENSG00000162641	4.25e-19	1	1	Yes; non-significant
SPAG5	ENSG00000076382	4.58e-19	17	1	Yes; non-significant
SNX18	ENSG00000178996	4.69e-19	5	1	Yes; non-significant
CAPN7	ENSG00000131375	4.77e-19	3	1	Yes; non-significant
M15530	NA	4.78e-19	16	1
MIR1234	ENSG00000071894	5.46e-19	8	1
LPHN2	ENSG00000215875	5.75e-19	1	1	Yes; non-significant
ANKRD20A5P	ENSG00000215559	8.38e-19	18	1
STK32C	ENSG00000165752	8.48e-19	10	1	Yes; non-significant
HORMAD2	ENSG00000176635	9.5e-19	22	1	Yes; non-significant
SBF1P1	ENSG00000248522	9.76e-19	8	1
ELOVL2	ENSG00000197977	1.01e-18	6	1	Yes; non-significant
IQUB	ENSG00000164675	1.08e-18	7	1	Yes; non-significant
ZNF606	ENSG00000166704	1.16e-18	19	1	Yes; non-significant
LOC100130542	NA	1.17e-18	14	1
EIF2B3	ENSG00000070785	1.27e-18	1	1	Yes; non-significant
RBKS	ENSG00000171174	1.29e-18	2	1	Yes; non-significant
CN291296	ENSG00000143641	1.32e-18	1	1
TMEM48	ENSG00000058804	1.34e-18	1	1	Yes; non-significant
MIR943	ENSG00000185049	1.34e-18	4	1
AA114939	ENSG00000278898	1.35e-18	8	1
A3GALT2	ENSG00000184389	1.43e-18	1	1
LINC01714	ENSG00000227634	1.53e-18	1	1
MEP1B	ENSG00000141434	1.54e-18	18	1	Yes; non-significant
MAS1	ENSG00000130368	1.58e-18	6	1	Yes; non-significant
KIAA1432	ENSG00000107036	1.79e-18	9	1	Yes; non-significant
BG496815	ENSG00000232053	1.86e-18	7	1
UBE2QL1	ENSG00000215218	1.89e-18	5	1	Yes; non-significant
PRR20D	ENSG00000227151	1.89e-18	13	1
PAWR	ENSG00000177425	1.92e-18	12	1	Yes; non-significant
HERC2P2	ENSG00000140181	1.95e-18	15	1
TTTY21	ENSG00000228890	2.04e-18	Y	1
CD252206	NA	2.12e-18	6	1
PRG2	ENSG00000254979	2.36e-18	11	1	Yes; non-significant
OR2T6	ENSG00000198104	2.37e-18	1	1	Yes; non-significant
SLAMF9	ENSG00000162723	2.51e-18	1	1	Yes; non-significant
LOC100129354	ENSG00000236409	2.53e-18	3	1
BU568084	ENSG00000258912	2.55e-18	14	1
LOC100129060	NA	2.65e-18	3	1
CR748318	NA	2.72e-18	4	1
ZIC3	ENSG00000156925	2.84e-18	X	1	Yes; non-significant
DQ581928	ENSG00000279072	3.4e-18	7	1
SCARNA8	ENSG00000251733	3.54e-18	9	1
BM683706	NA	3.63e-18	18	1
POU6F2	ENSG00000106536	3.77e-18	7	1	Yes; non-significant
IMMP1L	ENSG00000148950	3.93e-18	11	1	Yes; non-significant
FAM196B	ENSG00000204767	4.07e-18	5	1
MIR219-2	ENSG00000284185	4.07e-18	9	1
AW452324	NA	4.22e-18	16	1
AK097513	ENSG00000177369	4.25e-18	17	1
CSPG5	ENSG00000114646	4.27e-18	3	1	Yes; non-significant
TNK1	ENSG00000174292	4.58e-18	17	1	Yes; non-significant
CLDN24	ENSG00000185758	4.73e-18	4	1
LOC340094	ENSG00000215231	4.83e-18	5	1
C8orf86	ENSG00000196166	4.88e-18	8	1	Yes; non-significant
DA681010	NA	4.98e-18	2	1
GOLGA8VP	ENSG00000259236	5.2e-18	15	1
MIR1228	ENSG00000123384	5.3e-18	12	1
BC038752	ENSG00000261202	5.53e-18	22	1
HIPK1	ENSG00000163349	6.1e-18	1	1	Yes; non-significant
DCDC2B	ENSG00000222046	6.27e-18	1	1	Yes; non-significant
ARFRP1	ENSG00000101246	6.47e-18	20	1	Yes; non-significant
BQ028043	NA	6.68e-18	8	1
C20orf96	ENSG00000196476	6.83e-18	20	1	Yes; non-significant
TMEM129	ENSG00000168936	7.11e-18	4	1	Yes; non-significant
AI989593	NA	7.12e-18	3	1
CA9	ENSG00000107159	7.13e-18	9	1	Yes; non-significant
FLJ10661	ENSG00000173295	7.18e-18	8	1
XPNPEP3	ENSG00000196236	7.32e-18	22	1	Yes; non-significant
LRRC31	ENSG00000114248	7.42e-18	3	1	Yes; non-significant
LOC285796	ENSG00000281692	7.66e-18	6	1
CHRNA1	ENSG00000138435	7.7e-18	2	1	Yes; non-significant
NFATC4	ENSG00000100968	8.11e-18	14	1	Yes; non-significant
JAM2	ENSG00000154721	8.24e-18	21	1	Yes; non-significant
AI193410	NA	8.41e-18	8	1
STMN3	ENSG00000197457	8.53e-18	20	1	Yes; non-significant
C8orf80	ENSG00000189233	8.6e-18	8	1
DCLK3	ENSG00000163673	9.14e-18	3	1	Yes; non-significant
GAR1	ENSG00000109534	9.78e-18	4	1	Yes; non-significant
AV763264	NA	1e-17	6	1
LOC100133669	ENSG00000282681	1e-17	8	1
ASS1	ENSG00000130707	1.01e-17	9	1
HSPB7	ENSG00000173641	1.02e-17	1	1	Yes; non-significant
PRDM6	ENSG00000061455	1.04e-17	5	1	Yes; non-significant
AV716776	ENSG00000189057	1.05e-17	11	1
PRSS36	ENSG00000178226	1.12e-17	16	1	Yes; non-significant
TAS2R4	ENSG00000127364	1.12e-17	7	1	Yes; non-significant
SUSD4	ENSG00000143502	1.14e-17	1	1	Yes; non-significant
DKFZp434I138	ENSG00000241621	1.16e-17	10	1
OR2L2	ENSG00000203663	1.23e-17	1	1	Yes; non-significant
MRGPRD	ENSG00000172938	1.25e-17	11	1	Yes; non-significant
FLJ46361	ENSG00000176584	1.43e-17	10	1
LOC400558	ENSG00000205015	1.46e-17	16	1
BF514086	NA	1.47e-17	2	1
CCDC177	ENSG00000267909	1.48e-17	14	1
RHPN1	ENSG00000158106	1.53e-17	8	1	Yes; non-significant
SLC13A4	ENSG00000164707	1.6e-17	7	1	Yes; non-significant
RP11-419L10.1	ENSG00000049618	1.62e-17	6	1
AV750156	ENSG00000250244	1.62e-17	5	1
ABCD2	ENSG00000173208	1.63e-17	12	1	Yes; non-significant
CCK	ENSG00000187094	1.63e-17	3	1	Yes; non-significant
MMP14	ENSG00000157227	1.64e-17	14	1	Yes; non-significant
LOC642648	NA	1.67e-17	22	1
MEP1A	ENSG00000230062	1.68e-17	6	1	Yes; non-significant
DQ594410	NA	1.75e-17	6	1
LINC00173	ENSG00000196668	1.8e-17	12	1
PKP4	ENSG00000144283	1.81e-17	2	1	Yes; non-significant
MIR10A	ENSG00000257178	1.83e-17	17	1
TACR2	ENSG00000075073	1.93e-17	10	1	Yes; non-significant
RAI2	ENSG00000131831	1.96e-17	X	1	Yes; non-significant
LOC729338	ENSG00000224786	1.97e-17	4	1
LETM2	ENSG00000165046	2e-17	8	1	Yes; non-significant
FETUB	ENSG00000090512	2.04e-17	3	1	Yes; non-significant
GRPR	ENSG00000126010	2.05e-17	X	1	Yes; non-significant
CA849062	ENSG00000244358	2.11e-17	3	1
CYMP	ENSG00000240194	2.12e-17	1	1
C22orf46	ENSG00000184208	2.13e-17	22	1	Yes; non-significant
LOC653581	ENSG00000277895	2.14e-17	12	1
JAK1	ENSG00000162434	2.19e-17	1	1	Yes; non-significant
FLJ30679	ENSG00000280278	2.2e-17	16	1
STARD7-AS1	ENSG00000204685	2.21e-17	2	1
MIR487A	ENSG00000258861	2.21e-17	14	1
HIPK4	ENSG00000160396	2.24e-17	19	1	Yes; non-significant
AGR2	ENSG00000106541	2.25e-17	7	1	Yes; non-significant
ASB18	ENSG00000182177	2.26e-17	2	1	Yes; non-significant
AW082312	NA	2.27e-17	19	1
LOC91948	ENSG00000251209	2.3e-17	15	1
DA720951	NA	2.31e-17	5	1
APOL1	ENSG00000100342	2.34e-17	22	1	Yes; non-significant
C8orf34	ENSG00000165084	2.54e-17	8	1	Yes; non-significant
BM987531	NA	2.54e-17	16	1
KCNJ8	ENSG00000121361	2.65e-17	12	1	Yes; non-significant
SMPD4	ENSG00000136699	2.65e-17	2	1	Yes; non-significant
PRSS50	ENSG00000206549	2.65e-17	3	1	Yes; non-significant
CHPF	ENSG00000123989	2.69e-17	2	1	Yes; non-significant
C19orf29-AS1	ENSG00000226800	2.71e-17	19	1
DA481142	ENSG00000265282	2.77e-17	17	1
AW081620	NA	2.81e-17	6	1
AI677894	NA	2.85e-17	16	1
VANGL2	ENSG00000162738	2.88e-17	1	1	Yes; non-significant
KL	ENSG00000133116	2.89e-17	13	1	Yes; non-significant
CYP7B1	ENSG00000172817	2.9e-17	8	1	Yes; non-significant
DDX23	ENSG00000257616	2.92e-17	12	1	Yes; non-significant
FLT4	ENSG00000037280	2.92e-17	5	1	Yes; non-significant
DB454962	ENSG00000269364	2.93e-17		1
AW294430	NA	3.03e-17	16	1
MSX1	ENSG00000163132	3.03e-17	4	1	Yes; non-significant
LOC728178	ENSG00000261360	3.03e-17	5	1
AF131813	ENSG00000224911	3.04e-17	17	1
LEPREL4	ENSG00000141696	3.06e-17	17	1	Yes; non-significant
AK023584	ENSG00000146373	3.11e-17	6	1
DEFB1	ENSG00000164825	3.13e-17	8	1	Yes; non-significant
CR597362	ENSG00000138380	3.15e-17	2	1
KIRREL3	ENSG00000149571	3.17e-17	11	1	Yes; non-significant
BC037739	ENSG00000227143	3.18e-17	10	1
C9orf30	ENSG00000263368	3.2e-17	17	1
C1orf140	ENSG00000234754	3.23e-17	1	1
CA429657	NA	3.26e-17	12	1
NNMT	ENSG00000166741	3.31e-17	11	1	Yes; non-significant
THOP1	ENSG00000172009	3.34e-17	19	1	Yes; non-significant
AW297072	ENSG00000247199	3.41e-17	5	1
BU633077	NA	3.46e-17	12	1
UNC80	ENSG00000144406	3.56e-17	2	1	Yes; non-significant
LOC283710	ENSG00000259772	3.58e-17	15	1
BQ227432	ENSG00000187187	3.64e-17	19	1
BCL2A1	ENSG00000140379	3.64e-17	15	1	Yes; non-significant
C20orf54	ENSG00000101276	3.65e-17	20	1
TIMM17B	ENSG00000126768	3.67e-17	X	1	Yes; non-significant
TRAF4	ENSG00000076604	3.88e-17	17	1	Yes; non-significant
KLRK1	ENSG00000255819	3.88e-17	12	1	Yes; Significant
PLA2G2D	ENSG00000117215	3.92e-17	1	1	Yes; non-significant
MIR618	ENSG00000208022	3.97e-17	12	1
ZNF285A	ENSG00000018607	4e-17	19	1
BX106598	NA	4.01e-17	11	1
EG328730	ENSG00000224676	4.06e-17	22	1
ZBTB39	ENSG00000166860	4.09e-17	12	1	Yes; non-significant
ZNF10	ENSG00000256223	4.24e-17	12	1	Yes; non-significant
AW087731	NA	4.25e-17	13	1
OR13A1	ENSG00000256574	4.26e-17	10	1	Yes; non-significant
DKFZp434I2135	ENSG00000181097	4.33e-17	8	1
ZNF585B	ENSG00000245680	4.39e-17	19	1
SOS2	ENSG00000100485	4.39e-17	14	1	Yes; non-significant
AI525756	NA	4.46e-17	7	1
ASTE1	ENSG00000034533	4.48e-17	3	1	Yes; non-significant
CASP10	ENSG00000003400	4.55e-17	2	1	Yes; non-significant
BG195479	NA	4.6e-17	1	1
AI198908	NA	4.63e-17	3	1
BC036237	ENSG00000270835	4.65e-17	21	1
SMAD6	ENSG00000137834	4.68e-17	15	1	Yes; non-significant
LOC121838	ENSG00000233725	4.78e-17	13	1
FKBP9L	ENSG00000176826	4.82e-17	7	1	Yes; non-significant
LRRK2-DT	ENSG00000225342	4.94e-17	12	1
MYO1E	ENSG00000157483	4.95e-17	15	1	Yes; non-significant
BQ774745	NA	4.99e-17	15	1
BG119374	ENSG00000224292	5.08e-17	X	1
ACAP3	ENSG00000131584	5.08e-17	1	1	Yes; non-significant
BX119026	ENSG00000222031	5.11e-17	2	1
AK024625	ENSG00000186409	5.22e-17	1	1
TRIM32	ENSG00000119401	5.22e-17	9	1	Yes; non-significant
BX102511	ENSG00000180613	5.3e-17	4	1
BC032017	ENSG00000259998	5.32e-17	14	1
BASP1P1	ENSG00000230535	5.44e-17	13	1
BG213136	NA	5.49e-17	3	1
KCNS3	ENSG00000170745	5.68e-17	2	1	Yes; non-significant
EIF4A1	ENSG00000161956	5.79e-17	17	1	Yes; non-significant
LOC100506990	ENSG00000253893	5.81e-17	8	1
ARMCX4	ENSG00000196440	5.9e-17	X	1	Yes; non-significant
AK094963	ENSG00000234899	6.06e-17	17	1
BM857452	NA	6.07e-17	14	1
CB241739	NA	6.12e-17	11	1
FJX1	ENSG00000179431	6.33e-17	11	1	Yes; non-significant
SNORD113-6	ENSG00000200215	6.4e-17	14	1
COLEC12	ENSG00000158270	6.48e-17	18	1	Yes; non-significant
BU166084	ENSG00000130640	6.53e-17	10	1
FOXE3	ENSG00000186790	6.54e-17	1	1	Yes; non-significant
AI334326	NA	6.56e-17	6	1
BC037850	ENSG00000258803	6.59e-17	14	1
PAQR9	ENSG00000188582	6.7e-17	3	1	Yes; non-significant
GEMIN7	ENSG00000142252	6.72e-17	19	1	Yes; non-significant
DCD	ENSG00000161634	6.78e-17	12	1	Yes; non-significant
GGT8P	ENSG00000100031	6.89e-17	2	1
OK/SW-CL.36	NA	6.94e-17	4	1
ETV5	ENSG00000244405	7.05e-17	3	1	Yes; non-significant
CARTPT	ENSG00000164326	7.08e-17	5	1	Yes; non-significant
UTS2R	ENSG00000181408	7.11e-17	17	1	Yes; non-significant
SORCS1	ENSG00000108018	7.13e-17	10	1	Yes; non-significant
RAC1	ENSG00000249936	7.25e-17	7	1	Yes; non-significant
AA551223	NA	7.28e-17	6	1
LOC100129831	ENSG00000288156	7.37e-17	19	1
KIAA1462	ENSG00000165757	7.46e-17	10	1	Yes; non-significant
FNDC9	ENSG00000172568	7.49e-17	5	1	Yes; non-significant
RPS6	ENSG00000241352	7.51e-17	12	1
OTOA	ENSG00000257838	7.58e-17	16	1
GPR139	ENSG00000180269	7.7e-17	16	1	Yes; non-significant
SLC17A4	ENSG00000146039	7.71e-17	6	1	Yes; non-significant
BX093283	NA	7.74e-17	13	1
BI761065	NA	7.85e-17	3	1
ST7OT1	ENSG00000227199	7.85e-17	7	1
GSK3A	ENSG00000105723	7.87e-17	19	1	Yes; non-significant
TSPEAR	ENSG00000175894	7.9e-17	21	1	Yes; non-significant
FER1L6-AS1	ENSG00000181171	7.93e-17	8	1	Yes; non-significant
BG201663	NA	7.95e-17	X	1
OR13C4	ENSG00000148136	7.97e-17	9	1	Yes; non-significant
AI674699	ENSG00000277837	8.03e-17	18	1
BX099963	NA	8.11e-17		1
U10515	ENSG00000279755	8.11e-17	5	1
AFAP1L1	ENSG00000157510	8.15e-17	5	1	Yes; non-significant
C16orf74	ENSG00000154102	8.27e-17	16	1	Yes; non-significant
MIR494	ENSG00000207749	8.31e-17	14	1
MPZL3	ENSG00000160588	8.32e-17	11	1	Yes; non-significant
RC3H1	ENSG00000135870	8.4e-17	1	1	Yes; non-significant
BX111971	NA	8.51e-17	13	1
ARL13B	ENSG00000169379	8.54e-17	3	1	Yes; non-significant
BU855480	NA	8.56e-17	11	1
BACE1	ENSG00000186318	8.67e-17	11	1	Yes; non-significant
AK127458	ENSG00000261502	8.73e-17	16	1
CELF5	ENSG00000161082	8.77e-17	19	1	Yes; non-significant
AX746654	NA	8.88e-17	20	1
HQ448626	ENSG00000227913	9.05e-17	6	1
GCK	ENSG00000106633	9.08e-17	7	1	Yes; non-significant
EFCAB1	ENSG00000034239	9.16e-17	8	1	Yes; non-significant
AW995179	NA	9.25e-17	8	1
CXCL12	ENSG00000107562	9.31e-17	10	1	Yes; non-significant
NCCRP1	ENSG00000188505	9.38e-17	19	1	Yes; non-significant
CR593014	ENSG00000222612	9.61e-17	20	1
MIR1227	ENSG00000284129	9.62e-17	19	1
OR6M1	ENSG00000196099	9.65e-17	11	1	Yes; non-significant
AF151801	ENSG00000146574	9.66e-17	7	1
BX111310	NA	9.7e-17	12	1
C1orf96	ENSG00000154429	9.76e-17	1	1
MAFTRR	ENSG00000261390	9.84e-17	16	1
MIRLET7F1	ENSG00000199072	9.97e-17	9	1
AI809874	NA	1.01e-16	2	1
GUCY2F	ENSG00000101890	1.02e-16	X	1	Yes; non-significant
OR5AR1	ENSG00000172459	1.04e-16	11	1	Yes; non-significant
MGAT4C	ENSG00000182050	1.05e-16	12	1	Yes; non-significant
BU742963	NA	1.06e-16	3	1
LZTS2	ENSG00000107816	1.09e-16	10	1	Yes; non-significant
FAM151A	ENSG00000162391	1.1e-16	1	1	Yes; non-significant
AA293893	ENSG00000251276	1.1e-16	7	1
LHX4	ENSG00000121454	1.11e-16	1	1	Yes; non-significant
KLK8	ENSG00000129455	1.11e-16	19	1	Yes; non-significant
FAM190A	ENSG00000184305	1.12e-16	4	1	Yes; non-significant
PPAPDC2	ENSG00000205808	1.12e-16	9	1	Yes; non-significant
LOC728763	ENSG00000226321	1.13e-16	2	1
R35106	ENSG00000237293	1.14e-16	2	1
C21orf93	ENSG00000184274	1.16e-16	21	1
LOC100131195	NA	1.17e-16	10	1
ASB9	ENSG00000102048	1.18e-16	X	1	Yes; non-significant
MIR759	ENSG00000211579	1.18e-16	13	1
ZNF682	ENSG00000197124	1.19e-16	19	1	Yes; non-significant
C1orf172	ENSG00000175707	1.19e-16	1	1	Yes; non-significant
CA425772	ENSG00000234396	1.19e-16	1	1
IGKV2OR22-4	ENSG00000253691	1.2e-16	22	1
BM681626	NA	1.21e-16	15	1
MED15	ENSG00000099917	1.21e-16	22	1	Yes; non-significant
UQCR11	ENSG00000127540	1.22e-16	19	1	Yes; non-significant
USP39	ENSG00000168883	1.24e-16	2	1	Yes; non-significant
BM999001	NA	1.24e-16	1	1
BQ187514	NA	1.25e-16	5	1
LOC100630918	ENSG00000286532	1.26e-16	2	1
TTY1	ENSG00000129845	1.26e-16	Y	1
BX117351	NA	1.27e-16	3	1
BX094636	NA	1.27e-16	5	1
AI871856	NA	1.28e-16	3	1
DRC3	ENSG00000171962	1.28e-16	17	1
CUL3	ENSG00000036257	1.28e-16	2	1	Yes; non-significant
AA933949	NA	1.28e-16	10	1
CPA6	ENSG00000165078	1.29e-16	8	1	Yes; non-significant
SLC1A4	ENSG00000115902	1.29e-16	2	1	Yes; non-significant
BQ184553	NA	1.29e-16	20	1
AW205124	NA	1.3e-16	10	1
C2	ENSG00000235017	1.31e-16	6	1	Yes; non-significant
ANP32E	ENSG00000143401	1.32e-16	1	1	Yes; non-significant
TRIM45	ENSG00000134253	1.32e-16	1	1	Yes; non-significant
BX118761	NA	1.34e-16	20	1
AW449499	NA	1.36e-16	14	1
PCDHB3	ENSG00000113205	1.36e-16	5	1	Yes; non-significant
CDH17	ENSG00000079112	1.37e-16	8	1	Yes; non-significant
ADAMTSL3	ENSG00000156218	1.37e-16	15	1	Yes; non-significant
LOC646324	ENSG00000235770	1.38e-16	2	1
C1orf101	ENSG00000179397	1.38e-16	1	1	Yes; non-significant
EPS8	ENSG00000151491	1.39e-16	12	1	Yes; non-significant
LOC100130987	ENSG00000172613	1.39e-16	11	1
C19orf31	NA	1.39e-16	19	1
RGPD5	ENSG00000015568	1.4e-16	2	1
LRRC18	ENSG00000165383	1.4e-16	10	1	Yes; non-significant
GRM7	ENSG00000196277	1.42e-16	3	1	Yes; non-significant
SERPINA3	ENSG00000196136	1.42e-16	14	1	Yes; non-significant
DA953700	ENSG00000243193	1.42e-16	7	1
PLD4	ENSG00000166428	1.42e-16	14	1	Yes; non-significant
ZNF766	ENSG00000196214	1.43e-16	19	1	Yes; non-significant
TTY10	ENSG00000229236	1.43e-16	Y	1
MIR503	ENSG00000208005	1.44e-16	X	1
DUSP4	ENSG00000120875	1.44e-16	8	1	Yes; non-significant
NAP1L2	ENSG00000186462	1.45e-16	X	1	Yes; non-significant
BQ188349	ENSG00000267423	1.46e-16	19	1
BU684474	ENSG00000141522	1.47e-16	17	1
NYX	ENSG00000188937	1.48e-16	X	1	Yes; non-significant
WDR34	ENSG00000119333	1.49e-16	9	1	Yes; non-significant
RPL23AP64	ENSG00000240970	1.49e-16	11	1
AI200787	NA	1.49e-16	3	1
BX105859	ENSG00000283349	1.49e-16	X	1
LOC100132966	ENSG00000266028	1.5e-16	1	1
CR620587	ENSG00000279923	1.51e-16	5	1
TMEM186	ENSG00000184857	1.51e-16	16	1	Yes; non-significant
MIR496	ENSG00000207961	1.53e-16	14	1
BX092799	NA	1.53e-16	14	1
DA145142	ENSG00000266357	1.54e-16	17	1
BC036795	ENSG00000251535	1.54e-16	4	1
MYOM3	ENSG00000240284	1.57e-16	1	1	Yes; non-significant
C21orf70	ENSG00000160256	1.57e-16	21	1
CHIC1	ENSG00000204116	1.58e-16	X	1	Yes; non-significant
LCORL	ENSG00000178177	1.58e-16	4	1	Yes; non-significant
CRIP3	ENSG00000146215	1.58e-16	6	1	Yes; non-significant
ANKRD18EP	ENSG00000217165	1.59e-16	6	1
PAGE3	ENSG00000204279	1.6e-16	X	1	Yes; non-significant
IGLON5	ENSG00000213642	1.6e-16	19	1
FAM151B	ENSG00000152380	1.61e-16	5	1	Yes; non-significant
SRRM5	ENSG00000226763	1.62e-16	19	1	Yes; non-significant
RHOQ	ENSG00000119729	1.64e-16	2	1	Yes; non-significant
BX116795	ENSG00000113318	1.65e-16	5	1
PACRG	ENSG00000112530	1.66e-16	6	1	Yes; non-significant
KRTAP13-3	ENSG00000240432	1.67e-16	21	1	Yes; non-significant
ATP6V0E1	ENSG00000113732	1.69e-16	5	1	Yes; non-significant
C2orf57	ENSG00000177673	1.69e-16	2	1	Yes; non-significant
MTERFD2	ENSG00000122085	1.7e-16	2	1	Yes; non-significant
GLI3	ENSG00000106571	1.71e-16	7	1	Yes; non-significant
MYO3A	ENSG00000095777	1.71e-16	10	1	Yes; non-significant
C6orf99	ENSG00000203711	1.72e-16	6	1
MARCH11	ENSG00000183654	1.74e-16	5	1	Yes; non-significant
OR52E5	ENSG00000277932	1.75e-16	11	1
HES2	ENSG00000069812	1.75e-16	1	1	Yes; non-significant
DB118119	NA	1.76e-16	1	1
INHBA	ENSG00000122641	1.76e-16	7	1	Yes; non-significant
MIR573	ENSG00000207697	1.77e-16	4	1
BM009483	ENSG00000259424	1.77e-16	15	1
C20orf70	ENSG00000131050	1.78e-16	20	1
C21orf30	ENSG00000160233	1.8e-16	21	1
MIR32	ENSG00000207698	1.81e-16	9	1
C6orf155	ENSG00000233237	1.81e-16	6	1
LOC149134	ENSG00000227953	1.82e-16	1	1
EIF4B	ENSG00000224546	1.82e-16	9	1
DB273080	ENSG00000197361	1.83e-16	15	1
TRAF6	ENSG00000175104	1.83e-16	11	1	Yes; non-significant
KCNJ6	ENSG00000157542	1.83e-16	21	1	Yes; non-significant
RESP18	ENSG00000182698	1.84e-16	2	1	Yes; non-significant
AI859116	NA	1.86e-16	5	1
LOC731282	ENSG00000180346	1.87e-16	4	1
AV30S1	ENSG00000211800	1.87e-16	14	1
BQ709011	ENSG00000133111	1.89e-16	13	1
AK124143	ENSG00000113441	1.89e-16	5	1
MIR1275	ENSG00000221697	1.89e-16	6	1
PDCL	ENSG00000136940	1.91e-16	9	1	Yes; non-significant
CA416767	NA	1.93e-16	10	1
FAM184A	ENSG00000111879	1.94e-16	6	1	Yes; non-significant
LRIT1	ENSG00000148602	1.94e-16	10	1	Yes; non-significant
BQ447249	NA	1.97e-16	7	1
DB201663	ENSG00000253339	2.01e-16	8	1
CR749014	ENSG00000254563	2.01e-16	11	1
SPAG11B	ENSG00000164871	2.01e-16	8	1
KIAA1210	ENSG00000248857	2.02e-16	X	1	Yes; non-significant
ANP32B	ENSG00000136938	2.04e-16	9	1	Yes; non-significant
DB341552	NA	2.05e-16	5	1
SUN3	ENSG00000164744	2.05e-16	7	1	Yes; non-significant
AI792396	NA	2.05e-16	10	1
BX111535	ENSG00000270236	2.05e-16	9	1
WISP2	ENSG00000064205	2.06e-16	20	1	Yes; non-significant
BC030747	NA	2.06e-16	8	1
LOC100128064	ENSG00000239593	2.07e-16	9	1
CACNA1A	ENSG00000141837	2.08e-16	19	1	Yes; non-significant
APOM	ENSG00000206409	2.09e-16	6	1	Yes; non-significant
KRTAP13-2	ENSG00000182816	2.11e-16	21	1	Yes; non-significant
BU617439	NA	2.16e-16	10	1
MIR16-2	ENSG00000198987	2.16e-16	3	1
HAR1B	ENSG00000231133	2.16e-16	20	1
AK093382	ENSG00000262155	2.17e-16	16	1
C2orf52	ENSG00000181798	2.19e-16	2	1
SNHG10	ENSG00000247092	2.2e-16	14	1
TAL1	ENSG00000162367	2.23e-16	1	1	Yes; non-significant
DA924359	ENSG00000265485	2.24e-16	18	1
BM674971	NA	2.24e-16	6	1
ZNF772	ENSG00000197128	2.25e-16	19	1	Yes; non-significant
AI627827	NA	2.26e-16	9	1
SGTB	ENSG00000197860	2.27e-16	5	1	Yes; non-significant
MYH6	ENSG00000197616	2.27e-16	14	1	Yes; non-significant
USP27X	ENSG00000242013	2.27e-16	X	1
OMD	ENSG00000127083	2.28e-16	9	1	Yes; non-significant
BF431296	NA	2.31e-16	8	1
PLXNB3	ENSG00000184343	2.31e-16	X	1	Yes; non-significant
BF510292	NA	2.31e-16	18	1
PRSS56	ENSG00000237412	2.31e-16	2	1
MAGED4	ENSG00000221475	2.35e-16	X	1
LOC375295	ENSG00000163364	2.37e-16	2	1
SNORD88C	ENSG00000167747	2.37e-16	19	1
OR11H6	ENSG00000176219	2.37e-16	14	1	Yes; non-significant
VN1R4	ENSG00000228567	2.38e-16	19	1

[truncated: 5 more sheets: ST-6a, ST-6b, ST-7, ST-8, ST-9]
